# Supplementary material for: Representational Difference Analysis of Transcripts Involved in Jervine Biosynthesis
Source: Life (Basel). 2020 Jun 19;10(6):88. doi: 10.3390/life10060088 (PMC7344996; doi:10.3390/life10060088)
Supplement: Supplementary file 1 [file life-10-00088-s001.xlsx]

## Sheet: Table S1
Table S1. KEGG classification of the unigenes from V. nigrum after cDNA-RDA experiments.
KEGG Classification	Number of unigenes
	CHL-RDA	MeJ-RDA	SQ-RDA
Metabolism
Carbohydrate metabolism	310	261	382
Energy metabolism	156	145	194
Lipid metabolism	108	92	152
Steroid biosynthesis	11	8	14
Nucleotide metabolism	24	27	40
Amino acid metabolism	163	171	220
Metabolism of other amino acids	54	61	75
Glycan biosynthesis and metabolism	21	16	34
Metabolism of cofactors and vitamins	51	74	81
Metabolism of terpenoids and polyketides	25	19	41
Terpenoid backbone biosynthesis	10	3	9
Biosynthesis of other secondary metabolites	76	70	98
Xenobiotics biodegradation and metabolism	30	35	36
Genetic Information Processing
Transcription	40	41	59
Translation	139	126	171
Folding, sorting and degradation	119	127	149
Replication and repair	19	25	19
Environmental Information Processing
Membrane transport	6	8	14
Signal transduction	293	345	363
Signaling molecules and interaction	0	1	2
Cellular Processes
Transport and catabolism	127	125	151
Cell growth and death	107	112	139
Cellular community - eukaryotes	29	29	29
Cellular community - prokaryotes	25	17	28
Cell motility	0	6	7
Organismal Systems
Immune system	94	117	102
Endocrine system	116	94	128
Circulatory system	14	15	17
Digestive system	23	22	28
Excretory system	21	19	18
Nervous system	89	84	74
Sensory system	8	4	3
Development and regeneration	11	18	17
Aging	28	36	39
Environmental adaptation	57	66	81

## Sheet: Table S2
Table S2. Enzymes annotated to terpenoid backbone and sterols biosynthetic pathway with FPKM values.
Enzymes	EC numbers	Unigenes ID in CHL-RDA probe	TPM	FPKM	Unigenes ID in MeJ-RDA probe	TPM	FPKM	Unigenes ID in SQ-RDA probe	TPM	FPKM	Number of all unigenes
MVA Pathway
Acetyl-CoA acetyltransferase (AACT)	2.3.1.9	contig_1740	7.52	18.44	contig_1256	13.19	33.3532	contig_4023	12.3	34.8029	7
		contig_3003	10.62	26.05				contig_4533	1.7	4.82356
		contig_3237	11.58	28.41				contig_2129	32.93	93.2011
Hydroxymethylglutaryl-CoA synthase (HMGS)	2.3.3.10				contig_2571	7.09	17.94	contig_2290	12.65	35.7999	5
					contig_2572	5.01	12.6635	contig_449	141.83	401.466
					contig_2573	8.92	22.5531
Hydroxymethylglutaryl-CoA reductase (HMGR)	1.1.1.34				contig_481	10.29	26.0228	contig_625	8.16	23.1045	4
								contig_2911	18.86	53.387
								contig_4158	2.3	6.49984
Mevalonate kinase (MK)	2.7.1.36	contig_3491	0	0	contig_2352	21.28	53.8199				2
Phosphomevalonate kinase (PMK)	2.7.4.2	contig_2365	7.26	17.81							1
Diphosphomevalonate decarboxylase (MVD)	4.1.1.33	contig_3535	0	0				contig_1924	12.66	35.8232	2
MEP Pathway
1-deoxy-D-xylulose-5-phosphate synthase (DXS)	2.2.1.7	contig_1445	10.16	24.92	contig_458	9.32	23.5629	contig_483	4.22	11.9541	13
		contig_2411	28.99	71.12	contig_611	4.42	11.1702	contig_777	16.7	47.2682
		contig_2652	22.88	56.13	contig_1215	12.27	31.0228	contig_1800	28.15	79.6937
		contig_715	108.97	267.31				contig_3509	14.05	39.7828
		contig_1823	22.96	56.31
		contig_2118	0	0
1-deoxy-D-xylulose-5-phosphate reductoisomerase (DXR/IspC)	1.1.1.267	contig_1655	19.29	47.33	contig_2974	8.47	21.4305				3
		contig_3291	0	0
2-C-methyl-D-erythritol 4-phosphate cytidylyltransferase (CMS/IspD)	2.7.7.60	contig_552	252.18	618.62				contig_2875	9.67	27.3848	2
4-diphosphocytidyl-2-C-methyl-D-erythritol kinase (CMK/IspE)	2.7.1.148										0
2-C-methyl-D-erythritol 2,4-cyclodiphosphate synthase (MCS/IspF)	4.6.1.12							contig_177	22.92	64.8742	1
(E)-4-hydroxy-3-methylbut-2-enyl-diphosphate synthase (HDS/IspG)	1.17.7.1										0
4-hydroxy-3-methylbut-2-enyl diphosphate reductase (HDR/IspH)	1.17.7.4	contig_2338	9.04	22.19							1
cycloartenol synthesis
Isopentenyl-diphosphate delta-isomerase (IPI)	5.3.3.2	contig_2318	29.94	73.44							1
Geranyl diphosphate synthase (DPS)	2.5.1.1				contig_513	23.29	58.9073	contig_3068	9.71	27.4943	3
								contig_4531	6.87	19.4535
Farnesyl diphosphate synthase (FPS)	2.5.1.10				contig_1499	87.78	222.007	contig_2097	8.88	25.1472	6
					contig_2880	7.04	17.8051	contig_4726	1.85	5.24701
								contig_687	133.63	378.25
								contig_778	98.28	278.178
Squalene synthase (SQS)	2.5.1.21				contig_2951	3.44	8.70616	contig_473	180.56	511.071	3
					contig_2368	25.85	65.3763
Squalene monooxygenase (SQE)	1.14.14.17	contig_2367	25.2	61.82	contig_191	96.44	243.922	contig_316	81.54	230.792	8
		contig_339	172.4	422.9	contig_890	1052.8	2662.72	contig_3881	10.96	31.0086
		contig_3086	11.23	27.54
		contig_3542	4.1	10.06
Cycloartenol synthase (CAS)	5.4.99.8	contig_646	11.74	28.8				contig_1980	19.43	54.9886	4
								contig_4118	17.99	50.9154
								contig_1383	51.87	146.814
cholesterol synthesis
Sterol-4alpha-methyl oxidase (SMO)	1.14.18.9							contig_1086	97.92	277.16	1
Sterol-4alpha-carboxylate 3-dehydrogenase (HSD)	1.1.1.-	contig_1214	16.04	39.34	contig_1229	32.61	82.4703	contig_682	197.87	560.069	20
		contig_1290	10.32	25.32	contig_237	291.84	738.101	contig_3930	4.42	12.4974
		contig_491	21.15	51.89	contig_331	95.22	240.821	contig_186	76.4	216.247
		contig_2945	1556.81	3843.51	contig_1643	19.11	48.3281	contig_1999	9.71	27.4943
					contig_3257	31.34	79.2661	contig_3894	6.61	18.7036
					contig_2126	991.38	2507.37	contig_3988	7.33	20.7504
					contig_2132	36.99	93.5713	contig_941	3.68	10.4145
								contig_1125	22.39	63.3734
								contig_4352	4.64	13.1342
3-keto steroid reductase (3-KSR)	1.1.1.-	contig_63	191.89	470.71	contig_1516	1133.7	2867.33	contig_1962	55.77	157.862	7
		contig_2660	58.75	144.11	contig_3596	0	0	contig_4296	4.46	12.6121
		contig_1112	45.91	112.63
Cyclopropyl isomerase (CPI)	5.5.1.9	contig_2919	17.41	42.71				contig_4639	0	0	3
		contig_3106	0	0
Sterol 14-demethylase (CYP51G1)	1.14.14.154	contig_1185	9.31	22.85				contig_1491	31.83	90.0977	2
Delta14-sterol reductase (FK)	1.3.1.70				contig_2661	15.41	38.9807	contig_1658	11.09	31.3862	2
Cholestenol delta-isomerase (HYD1)	5.3.3.5										0
Delta(7)-sterol-C5(6)-desaturase (DWF7)	1.14.19.20				contig_3294	12.32	31.1589	contig_3994	7.59	21.4799	3
					contig_2255	11.02	27.8597
7-dehydrocholesterol reductase (DWF5)	1.3.1.21	contig_1955	31.46	77.16	contig_208	16.87	42.668	contig_1847	89.3	252.77	5
					contig_1569	29.16	73.7463	contig_2555	22.97	65.0203
Delta 24-sterol reductase (DWF1)	1.3.1.72	contig_1942	10.94	26.83	contig_1622	19.33	48.8823	contig_633	53.51	151.452	10
		contig_1121	3.73	9.14	contig_1956	27.61	69.8204	contig_3131	33.57	95.0264
					contig_2708	29.49	74.585	contig_3274	9.37	26.5097
					contig_1907	5.83	14.7544	contig_3384	7.18	20.316

## Sheet: Table S3
Table S3. Annotation of transcripts from subtractive libraries identified as CYP candidates.
No unique cluster	Unigenes ID	Nucleotide sequence	Unigene Length	FPKM	TPM	Blastx E-value	Per. Identity	NR Description	Blastx E-value	Blastx accession (E-value)	Function	Organs blastn E-value	Organs blastn accession (E-value)
1	SQ-RDA_contig_719	CCATGAACAGATCGCATTCATCTCAACATCTTGTAGCCAATTTAGATAGTAGAGGCAGTAGCTATATATGAAATGTTGAAACTAAGAGTTACAACTGCAATGGTTTTATAATGATGGGAAGACCATGTTGTGGTTGCAAAGTGAGGTTGTTAACAGGTGCATGTTCATAGTCAGGGGAAAGAGACCAAGAAAACCTTTGAAGAATTAAAGCCATCACTGTCTTAGCTTCCAACATAGCAAAATTTTGACCAATGCAATCTCTTGGACCCACAGAAAATGCAAGTAGAGCATTTGGGTGCTTTGAGGCCTTAGATACTCCATTTATGAATCTCATTGGATTGAACTCATTTGCATCTTCACCCCAGTATTTTTTACTTCTGTGAATCATTGTTATTGGAA…	435	139.05	49.13	3e-60	91.09%	cytochrome p450 734a6-like protein [Trifolium pratense]	7.91e-38	Sl: CYP734A7	C-26 hydroxylation
	CHL-RDA_contig_1693	CATGAACAGATCGCATTCATCTCAACATCTTGTAGCCAATTTAGATAGTAGAGGCAGTAGCTATATATGAAATGTTGAAACTAAGAGTTACAACTGCAATGGTTTTATAATGATGGGAAGACCATGTTGTGGTTGCAAAGTGAGGTTGTTAACAGGTGCATGTTCATAGTCAGGGGAAAGAGACCAAGAAAACCTTTGAAGAATTAAAGCCATCACTGTCTTAGCTTCCAACATAGCAAAATTTTGACCAATGCAATTTCTTGGACCCACAGAAAATGCAAGTAGAGCATTTGGGTGCTTTGAGGCCTTAGATACTCCATTTATGAATCTCATTGGATTGAACTCATTTGCATCTTCACCCCAGTATTTTTACTTCTGTGAATCATTGTTATTGGAATT…	433	62.84	25.62	2e-49	0.9398		1.24e-31	Sl: CYP734A7	C-26 hydroxylation
	MeJ-RDA_contig_1334	TAGCCAATTTAGATAGTAGAGGCAGTAGCTATATATGAAATGTTGAAACTAAGAGTTACAACTGCAATGGTTTTATAATGATGGGAAGACCATGTTGTGGTTGCAAAGTGAGGTTGTTAACAGGTGCATGTTCATAGTCAGGGGAAAGAGACCAAGAAAACCTTTGAAGAATTAAAGCCATCACTGTCTTAGCTTCCAACATAGCAAAATTTTGACCAATGCAATTTCTTGGACCCACAGAAAATGCAAGTAGAGCATTTGGGTGCTTTGAGGCCTTAGATACTCCATTTATGAATCTCATTGGATTGAACTCATTTGCATCTTCACCCCAGTATTTTTTACTTCTGTGAATCATTGTTATTGGAATTGTGAGACATGTTCCTCTAGGGAT	392	1175.19	69.27	3e-61	0.9208		3.92e-38	Sl: CYP734A7	C-26 hydroxylation
2	SQ-RDA_contig_1837	CATGAACAGATCACCATTCCATCCATATTCCTTAGGCAGAGAATGGAACAAAATGAGGAACAGGCTTGCACTTCAATGGTTTGGCCAAAAACACAGTAACCCTTCCCACTTCTGACATATCAATATCATGACTCTTCCCATCATTAACAACCCAATCATAGCATTGTATCAAACTTGCAAGTGTTGCTTGGATAACAAGCAAAGCAAGTGAAGAACCAGGGCAACTCCTTCTCCCACTACCAAATGGTAAAAGTTGGTAATATTGTCCCCTTACATCAATTTTGCTCTTAGGATCTGTTCATGG	304	90.44	31.95	6e-53	0.9545	cytochrome P450 93A1-like [Trifolium medium]	3.37e-08	Sl: CYP724B2	C-22 hydroxylation	3.27e-09	leaf_contig_48266
	CHL-RDA_contig_2359	ATTCCATCCATATTCCTTAGGCAGAGAATGGAACAAAATGAGGAACAGGCTTGCACTTCAATGGTTTGGCCAAAAACACAGTAACCCTTCCCACTTCTGACATATCAATATCATGACTCTTCCCATCATTAACAACCCAATCATAGCATTGTATCAAACTTGCAAGTGTTGCTTGGATAACAAGCAAAGCAAGTGAAGAACCAGGGCAACTCCTTCTCCCACTACCAAATGGTAAAAGTTGGTAATATTGTCCCCTTACATCAATTTTGCTCTTAGGATCTGTTCATG	288	50.87	20.74	5e-53	0.9545		2.78e-08	Sl: CYP724B2	C-22 hydroxylation	3.09e-09	leaf_contig_48266
	MeJ-RDA_contig_723	CATGAACAGATCACCATTCCATCCATATTCCTTAGGCAGAGAATGGAACAAAATGAGGAACAGGCTTGCACTTCAATGGTTTGGCCAAAAACACAGTAACCCTTCCCACTTCTGACATATCAATATCATGACTCTTCCCATCATTAACAACCCAATCATAGCATTGTATCAAACTTGCAAGTGTTGCTTGGATAACAAGCAAAGCAAGTGAAGAACCAGGGCAACTCCTTCTCCCACTACCAAATGGTAAAAGTTGGTAATATTGTCCCCTTACATCAATTTTGCTCTTAGGATCTGTTCATG	303	85.97	33.91	6e-53	0.9545		3.26e-08	Sl: CYP724B2	C-22 hydroxylation	3.26e-09	leaf_contig_48266
3	SQ-RDA_contig_3853	GTTTTTGTTGTGTTTTTTCTTGTTTTTTCTCTTTTGTTGTTTTTGTTTTTTTGTTTTTGGTTGTGTTTTTTTTTTTCAAGCATAAGACGGCATACGAGATTTCTGCCTGTCTCGTGGGCTCGGAGATGTGGATAAGAGACAGGATCAAAAGGGCGTAGGAAAGGAACATAATCAACCAGATTAAAAGCTCCGGTCAAAACTAATGCATCTTTAACCATTCTCTTCAAATCAAAATTCTCATACTTACTCCGACCCAATATCATCTTATACACAATTTCCTCTACAAGATTGGCTACTACCTCACTAACAGTCACAACCTCACCCACCAAAGCAGCTTTCTCCAAAGACTTTACCAAAACACCCAACTCATGCTTTCTAATAGGACCAAACATATCAACT…	537	5.12	1.81	4e-39	0.7107	cytochrome P450 CYP736A12 [Medicago truncatula]
	MeJ-RDA_contig_2156	CATGAACAGATCAAAAGGGCGTAGGAAAGGAACATAATCAGCCAGATTAAAAGCTCCGGTCAAAACTAATGCATCTTTAACCATTCTCTTCAAATCAAAATTCTCATACTTACTCCGACCCAATATCATCTTATACACAATTTCCTCTACAAGATTGTCTACTACCTCACTAACATTCACAACCTCACCCACCAAAGCAGCTTTCTCCAAAGACTTTACCAAAACACCCAACTCATGCTTTCTAATAGGACCAAACATATCAACTTTGGAAGCACTAAGAAGTTTCAAATTGCAAAGTTTCCTCGCACTACGCCAATACGAACCATACTCACAAAAAGCCATCCCTTTAGAACCATAAGACATGATATCAGATC	374	69.65	27.54	1e-43	0.7459
4	CHL-RDA_contig_263	ATGAACAGATCACGTGCGACAGCCCATACATTGACATGAACATTTGACCCTTTGGGAATATCGTAGCCACCGATTTTGACATTGGCGTTAGCGCGATGTGGGAGCATCAATGGTGTTGGGGGATGCAGCCTTAGAGCCTCCTTGGCTACAGATTGTAAATAAGGGAGGCTTGAGAAGTCAGTTTCAGTCATGACTCTTTCAAAACCAATGACCTTGTCTAGCTCCTCTTGTGCCTTCTGTTGCACTCTTGGGTTCTTTATCAACTCTGCCATGGCCCACTCAACTGATATTGCAGTTGTGTCCATCCCAGCTGTAATCATGTCCCAAAGGAGACCGATGATGGTGTCTTCACTAAGGTCATACTTGTCTTGCAAAGTGAGAAGGGCATCTACAAAATGT…	477	52.65	21.46	6e-104	0.9739	cytochrome p450 98a2-like protein [Trifolium pratense]	1.42e-16	Mt: CYP97B1	C-16 hydroxylation	3.54e-30	leaf_contig_45093
	MeJ-RDA_contig_1967	GCGACAGCCCATACATTGACATGAACATTTGACCCTTTGGGAATATCGTAGCCACCGATTTTGACATTGGCGTTAGCGCGATGTGGGAGCATCAATGGTGTTGGGGGATGCAGCCTTAGAGCCTCCTTGGCTACAGATTGTAAATAAGGGAGGCTTGAGAAGTCAGTTTCAGTCATGACTCTTTCAAAACCAATGACCTTGTCTAGCTCCTCTTGTGCCTTCTGTTGCACTCTTGGGTTCTTTATCAACTCTGCCATGGCCCACTCAACTGATATTGCAGTTGTGTCCATCCCAGCTGTAATCATGTCCCAAAGGAGACCGATGATGGTGTCTTCACTAAGGTCATACTTGTCTTGCAAAGTGAGAAGGGCATCTACAAAATGTTGCTTGGCGCCACCG…	444	112	44.28	3e-99	0.9728		2.09e-16	Mt: CYP97B1	C-16 hydroxylation	3.28e-30	leaf_contig_45093
5	SQ-RDA_contig_1491	CCATGAACAGATCAACTCTGTCTCCGTGTTTCTCCATCAAGTTCTTTTGCTCCTCCTCCACAGCAGAAAGGTACTGTTTGTTACACATGAGATATGCTCCGGTCCAAGTGGAGGTGATTGAACTGGTGTGCTGTCCTGCGAAAAGAGAAGCAATGAGGAGTCCTGTGACTTCACCTTCTGTTGTTGGGCGACCGTCTTTGTATTTTGAGTCAATGAAGCACTGCGGCATGTCGTCCTCTGACCTATTAGCACTTTTACGTGAAGATATGGTGTTGGTAAAGATTTCAGCAAGCTTCTTTCTTGCGTTGTCGCGGCGCCGGTGAGCTGGGATTGGCAGGTATGGGAGAAGAACACAGATCGGAAGCATTCCATTGTCGAGGACATGGAACAAAGCAGAGA…	473	90.1	31.83	2e-93	0.9073	sterol 14-demethylase [Medicago truncatula] CYP51G1	2.48e-10	Gg: CYP88D6	C-11 hydroxylation
	CHL-RDA_contig_1185	CATGAACAGATCAACTCTGTCTCCGTGTTTCTCCATCAAGTTCTTTTGCTCCTCCTCCACAGCAGAAAGGTACTGTTTGTTACACATGAGATATGCTCCGGTCCAAGTGGAGGTGATTGAACTGGTGTGCTGTCCTGCGAAAAGAGAAGCAATGAGGAGTCCTGTGACTTCACCTTCTGTTGTTGGGCGACCGTCTTTGTATTTTGAGTCAATGAAGCACTGCAGCATGTTGTCCTCTGACCTATTAGCACTTTTACGTGAAGATATGATGTTGGTAAAGATTTCAGCAAGCTTCTTTCTTGCGTTGTCGCGGCGCCTGTGAGCTGGGATTGGCAGGTATGGGAGAAGAACACTGATTGGAAGCATTCCATTGTCGAGGTCATGGAACAAAGCAGGAGC…	458	22.85	9.31	3e-80	0.9219		5.2e-12	Gg: CYP88D6	C-11 hydroxylation
6	CHL-RDA_contig_1706	CATAGGGACCCTGAAACATGGAGTGAAGCCACAACTTTCAAGCCTGAAAGGTTTGATAAAAAAGGAGAGTTGGAGAAGATGATTGCATTTGGGATGGGAAGAAGAGCATGTCCTGGAGAAGGCTTGGCTCTTAGAGCAATTAGCATGACTTTGGCATTATTGGTTCAATGCTTTGATTGGAAACGTATAAATGATGAAAAAATTGATATGTCTGAACGAGATGGATTCACTTTGACAAAATTAGTACCATTGAAAGCTATGTGTAAAAC	269	23.34	9.52	3e-55	0.9775	isoflavone 2'-hydroxylase [Medicago truncatula] CYP81E7	7.23e-09	Sl: CYP724B2	C-22 hydroxylation	6.28e-138	stalk_contig_3365
	MeJ-RDA_contig_1600	TCCATGAACAGATCAATGCTTGGGCTATTCATAGGGACCCTGAAACATGGAGTGAAGCCACAACTTTCAAGCCTGAAAGGTTTGATAAAAAAGGAGAGTTGGAGAAGATGATTGCATTTGGGATGGGAAGAAGAGCATGTCCTGGAGAAGGCTTGGCTCTTAGAGCAATTAGCATGACTTTGGCATTATTGGTTCAATGCTTTGATTGGAAACGTATAAATGATGAAAAAATTGATATGTCTGAACGAGATGGATTCACTTTGACAAAGTTAGTACCATTGAAAGCTATGTGTAAAACTCGTCCCGTCGTCAACAAGGTTTTCAAGTAAATTTGTCTAAGGAAAGATAAGGATTTATCTAAGGTTTTCAAGTAATTAATTTGTGCCATAATAATATATC…	429	49.68	19.64	7e-69	0.981		3.04e-09	Gg: CYP88D6	C-11 hydroxylation	0	stalk_contig_3365
7	SQ-RDA_contig_1773	TTCTCGTTGAGCTCATCTTAGGACACTTGCGTTATCTTTTAACAGATGTGCCGCCCCAGCCAAACTCCCCACCTGACAATGCCTTCCGCCCGGATCAGCAACAGAATGGGCAATGGCAGAGCTACTCCATAATCCAAAAATAATGAAAAAAGCAAGAAATGAAGTGATTCAAGTAATTCCCAAATCCAAACAAGTGAAAGAATCAGACATTCCAACACTTCCTTACATCCAAGCAATAGTAAAAGAAACACTTAGACTTCATCCACCTGTACCACTTCTCTTACCTTATATTGCATCAAATGATGTTGAAATCAATGGTTACACAATTCACAAAGGAAACCAAGTGTTAATAAATGCTTGGTCTATTGGAAGAAACCCTGAGTTTTGGGATGATCTGTT…	403	300.19	106.05	2e-46	0.9109	cytochrome P450 family protein [Medicago truncatula]	3.49e-10	Mt: CYP97B1	C-16 hydroxylation	2.78e-05	leaf_contig_2384
	MeJ-RDA_contig_396	GATCAACAACAGAATGGGCAATGGCAGAGCTACTCCATAATCCAAAAATAATGAAAAAAGCAAGAAATGAAGTGATTCAAGTAATTCCCAAATCCAAACAAGTGAAAGAATCAGACATTCCAACACTTCCTTACATCCAAGCAATAGTAAAAGAAACACTTAGACTTCATCCACCTGTACCACTTCTCTTACCTTATATTGCATCAAATGATGTTGAAATCAATGGTTACACAATTCACAAAGGAAACCAAGTGTTAATAAATGCTTGGTCTATTGGAAGAAACCCTGAGTTTTGGGA	298	63.57	25.14	2e-45	0.9286		6.37e-10	Mt: CYP97B1	C-16 hydroxylation	2.02e-05	leaf_contig_2384
8	SQ-RDA_contig_4210	ATCCATATCTTGATACAAAAGCTCGACAATGTGCTTCAACACCCTCTCAGTATGAAATTTTGTAATCTGTCTCAATCTGCTCGACGAAACATCATCTCAGCTCCGTCCATTGGTCTCGGGTGTGGCTGATATGCAACGCCCGCCTCTGGATTCAAGAGCTCCCACCTATAATTGAGGCATACATGATGCAGAAACATCATAATTTGGAGTTTGGCAAACGTGCTGCCTGGACAATAC	237	0	0	9e-23	0.717	ent-kaurenoic acid oxidase 2-like [Asparagus officinalis] CYP88A	3.66e-12	Gg: CYP88D6	C-11 hydroxylation
	CHL-RDA_contig_648	CCATATCTTGATACAAAAGCTCGACAATGTGCTTCAACACCCTCTCAGTATGAAATTTTGTAATCTGTCTCAATCTGCTCGACGAAACATCATCTCAGCTCCATCCATTGGTCTCGGGTGTGGCTGATATGCAACGCCCGCCTCTGGATTCAAGAGCTCCCACCTATAATTGTGCATACATGATGCAGAAACATCATAATTTGGAGTTTGGCAAAGGTGCTGCCTGGACAATACCTCATGCCCGCTCCAAACACCGAATATGTCCCCGGTTTGGGTTTCAAATCATCCCATCTATCTGGGTTGAATTTCAATGGATCGGTGTTCATGGATAGTCGACGTCGGTCGGTTGTTCAT	354	295.62	120.51	2e-29	0.7143		2.59e-16	Gg: CYP88D6	C-11 hydroxylation
9	CHL-RDA_contig_2672	CCATGAACAGATCCACAGGTGAGGATTTTCCCATCTGCCGCTATCCATGTTACATCCGTATATATTTATTGCAATCTCGCTTCCAGCAGGAATATGATATCCTCCCAGTTCGGTATCCTCATGAACATATCTTAGTGGGACAATAGGAACCGGACTGTGCTTCCTCAGAGTTTCATGGAATACAGCCCCCAAGTAAGGAAGCTTAGATAATTGGTCGTCTGAAACCTTTTCATGTCCACATATATTTAGGACCTCCTCATACAGATGATCTGTTCATGGA	280	44.85	18.28	4e-46	0.8046	cytochrome P450 monooxygenase CYP701A16. partial [Glycine max]	7.07e-14	At: CYP734A1, BAS1	C-26 hydroxylation
	MeJ-RDA_contig_2736	TCCATGAACAGATCCACAGGTGAGGATTTTCCCATCTGCCGCTATCCATGTTACATCCGTATATATTTATTGCAATCTCGCTTCCAGCAGGAATATGATATCCTCCCAATTCGGTATCCTCATGAACATATCTTAGTGGGACAATAGGAACTGGACTGTGCTTCCTCAGAGTTTCATGGAATACAGCCCCCAAGTAAGGAAGCTTAGATAATTGGTCGTCTGTAACCTTTTCATGTCCACATATATTTAGGACCTCCTCATACAGACGATCTGTTCATG	279	84.88	33.56	2e-47	0.8161		2.45e-14	At: CYP734A1, BAS1	C-26 hydroxylation
10	SQ-RDA_contig_1468	CCATGAACAGATCGGCGTGTGGAGGAATCAGACATCGAGAAACTCACTTATCTAAAATGTGCCGTCAAAGAGACTTTGCGTCTTCACCCGCCGATTCCCCTTCTCCTCCACGAGACTGCAGAGGACGCCAAGGTTGGTGGTTATTTTGTTCCGAAAGGCTCACGCGTGATGATAAACGTGTGGGCTATAGGAAGAGACAAAGACTCGTGGGAGG	214	147.75	52.2	7e-27	0.9853	cytochrome P450 84A1 [Medicago truncatula]	1.15e-07	At: CYP86A2, unspecific monooxygenase	C-16 hydroxylation	4.96e-05	stalk_contig_3365
	MeJ-RDA_contig_2746	TCGACTATCCATGAACAGATCGGCGTGTGGAGGAATCAGACATCGAGAAACTCACTTATCTAAAATGTGCCGTCAAAGAGACTTTGCGTCTTCACCCGCCGATTCCCCTTCTCCTCCACGAGACTGCAGAGGACGCCAAGGTTGGTGGTTATTTTGTTCCGAAAGGCTCACGCGTGATGATAAACGTGTGGGCTATAGGAAGAGACAAAGACTCGTGGGAGGATCTGTTCAT	232	40.83	16.14	1e-27	0.9855		1.55e-07	At: CYP86A2, unspecific monooxygenase	C-16 hydroxylation	5.39e-05	stalk_contig_3365
11	CHL-RDA_contig_2	CTATCCATGAACCACCGACGTCGACTATCCATGAACAGCACTCTCCAGCCTCTCACCGCAGATCCGTAACTTCGGGAAAAGGATTGGCTCTGAGGACTGGGCACGGGGGTCCTAGCCCTGAACCCGCTGGCTGCCTGCGGACTGCTCGAGCTGCGCTTGTGGCGAGAGCGCGCCGCTGCGTGTTGGTCGGGGGACGGACTCGGAATGACCCTCTCGGGGGCCTTCCTCGGGCGTCGAACAGTTGACTCAGAACTGGTACGGACAAGGGGAATCCGACTGTTTAATTAAAACAAAGCATTGCGATGGTCCAAGCGGATGCTTACGCAATGTGATTTCTGCCCAGTGCTCTGAATGTCAAAGTGAAGAAATTCAATCAAGCGCGGGTAAACGGCGGGAGTA…	863	46843.9	19096	7e-78	80.00%	senescence-associated protein [Gossypium australe]
12	CHL-RDA_contig_1349	AGCACTCTCCAGCCTCTCACCGCAGATCCACGGACAAGATGGTGCTCGATAAAAGGTTGAGCGACGTGGCGAACACCACCCTCCCGATATCCACCGCCTCCCCGGCCTCGCACCGGGCACGCACGTACTCCACCAAGTTTCGAGCCTTCGATTCCCTTAGCCCCCGCCGGTCGTCGAGCTGCCGCGAGGCGAACAGCTGCTTGCTGTAGACCTTCCGGAGGTCGCGCCAGCCCTGGTCCAGCTGGTGGAAGGTCAGCGTGCGCTTTCCGTGGCCAAGGGCCAAGACGGCGTCGGGGAGGGAGCGGCCGCAAAAGTCCTGGTCACGGTTTTTGAGGACTTCACGGGCGACGTTGGGGGAGGAGACCACGACAGTGGTGACGGTCCCGAGCCGGACGGACA…	456	91.8	37.42	4e-27	0.4545	Cytochrome P450 [Vigna unguiculata]	0.05	Sl: CYP734A7	C-26 hydroxylation	0	root_contig_454
13	SQ-RDA_contig_2378	TCCATGAACAGATCTTGGCTTAGCAACAATGGTGGAATGTTTGAGTATGTGCAAACTAAATTGTCCTCCTTTCTCAGAAGTGTCAATCTTAGATTGTCCAGGTGGAGGTAAAAGCTCGAAATTCTGAACGAGACGCCCAATAGTGATACCAAGGATAGGTAAAGCAAGAATAATTCCGGGGCAACTTCTTCTGCCAACACCGAAAGGAAGGTACCTAAAATCGTTTCCATTAGCTTCGACATGAGACTCTTCCTCCAAGAACCTCTCAGGCCTGAATTCCTCCGGCTTTTTCCAGTGAGCCGGGTTGTTTGCTAGCCACCATGCATTGACCAATATCTTGCTCTCGGCCGGGATGTCGAAACCACCAAGCTTTGCATCATGAAGGTTCATGTGTGGGAC…	421	101.23	35.76	8e-174	0.9453	Medicago truncatula cytochrome P450 monooxygenase CYP73A3 (CYP73A3) mRNA. complete cds	6.36e-05	Mt: CYP97B1	C-16 hydroxylation	1.95e-121	stalk_contig_25346
14	CHL-RDA_contig_1943	ACCGCAGATCCCGGGCGGCCTGAGAAGATGATGTCGTAGGCCGGGAAAATGGATTTAAGGGCAGCGGCGGAGGAGATGACAAGGCTGGGCACGGAACCGAGCTGGAGGGACATGAGGGGCCCGTGCTCCGCCGACAACTTCGCTAGGGATCGGTGAGGGAGGGTGCCGAGCTGGTGGAGGTTTCCGATAAACGGGAGCCTCGGCGGTGAAGGGGGCGATGAGTTCTACTTTTTCCTCCATGGAGATGCAGCTTTGGTATTGTTGAAGAGGTAGTAGATTGAGAAGGTGATGAGGATGAAGAGTAGTAGTGGGACAAACAAGATGGAATTAATGTGCTGCATGTTGATCTGTTCAT	355	41.27	16.82	3e-22	0.7143	Cytochrome P450 71A9. partial [Mucuna pruriens]				8.46e-81	stalk_contig_2602
15	SQ-RDA_contig_2941	GTGTCTTTTCCTTTATATAAAAACCATCAATTGTTATATTCTCTCTGCATTCACGAGGGAGTAATAAGGGTGCACCAGGGTAAAGTCTAAAGGTCTCATCCACCACCATATCTAAGTATCTAAACTTGTTCAAATCATTCTCTTCAACCATTCTTTTATTTCCTACTTCATTTTGTATCTCATCTTGAAGCTTTTTCATCACTCTTGGATGTCGTAGAAGTTCCGATAAAGCCCATACAACCGCGGTAGAAGATGTATCAATGGATGCTACAATCATGTATGATAAAATTGCCTTGATGTTATCTCGACCAATGACATGATCTGTTCAT	329	29.25	10.33	4e-50	0.8095	cytochrome P450 CYP736A12 [Medicago truncatula]	5.99e-13	Mt: CYP97B1	C-16 hydroxylation	2.25e-05	leaf_contig_458
16	MeJ-RDA_contig_930	TCCATGAACAGATCTGATGGACATGTTGGTGAGGGAAACAGGGATTTTGTGGACATTTTGCTTTCAGTTCAAAAGAGCAATGCTGCTGGTTTCTCAATTGATGGAACTGCAATTAAGGGTTTGCTACTGGACATGTTTGCTGCAGGTACTGACACTACATACACAGTCCTAGAATGGGCAATGACAGAACTATTAAGACACGAAACTGTGATGCATAAATTGCAAGATGAGGTGAGGAATGTGGTTGGTAACAGAACTCATGTAACTGAGGAGGATTTGGTTAACATGAACTTTTTGAAGGCTGTGATCTGTTCATG	317	67.23	26.58	3e-58	0.9126	cytochrome P450 71A25 [Medicago truncatula]	3.7e-07	Mt: CYP97B1	C-16 hydroxylation
17	CHL-RDA_contig_2149	GTCGACTATCCATGAACAACCACGGCACCATCGTCGTCGCGACCGTGTTCGCGGGGTCGTACCTGAAACCCGCGGCGCGCCAGCAGTTCAACCGGGACTACGGCCTCTTCAACGTCGGGCTCATGGCGGCCCCCTTCGACCTCCCCGGGTTCGCCTTCCGCCGTGCGAGGCTCGCCGTCGAGCGCCTCGCCGGAACCCTCGCCGGCTGCGTTGCCGGAAGCAGGGCCCGGATGGGTGCTGGCGGGGACCCTGCCTGCCTTGTCGATTTCTGGATGCAGGACGAACTCCGTGAGCATTCATCCACGCCCGATCTGC	315	0	0	1e-36	0.7444	cytochrome P450 710A11-like [Phoenix dactylifera]	9.36e-05	At: CYP90B1, DWF4	C-22 hydroxylation
18	SQ-RDA_contig_2569	GGATGAACTCGACATAGTGGTCGGCGACAATGGAGTGGTGGAAGAATCCCATATCCCTGGCCTACGATACCTCGACGCCGTGGTGAAAGAGACGCTTCGCTTTCATCCAGCGGCCCCCCTTTTAATCCCCCATTGCCCGAGCACAACCTGCACCGTTGGCGGCTGTACAATCCCCAAGGGCACCAGGCATGGATTCACCCATAAGACATCTTCAACGTGCTTCATCCATTCATTTTGAAGGAATGAAGCTGCTCCAACGGTGCTTCATTCGTCCCTTCAAAAAAAGCCTTAAGCGGGTTTTGATCTGCGGTGAG	314	8.76	3.09	9e-23	0.7541	Cytochrome P450 76C4 [Morella rubra]	8.68e-06	Mt: CYP97B1	C-16 hydroxylation	2.12e-157	root_contig_471-1
19	CHL-RDA_contig_1258	TCAAAGTCAAAGAAGAAACATGTCAAGTCGAAGTCAAAGTCAAAGAAGAAACGTATTTCACGTCCAAAAACACAAGACTCTGATACAGAGGAGGAGGCACTCTGGCCTGATGATAATGATCAGAATCAAACGAGCTTTTACCCTTTTGCTCCACACGAGACTTCTGTTCTCGTTGAGCTCATCTTAGGACACATGCGTTATCTTTTAACAGATGTGCCTCCCCAGCCACACTCCCCACCTGACAATGTCTTCCGCCCGGATCTGTTCATGGATAGTCGACGTCGTGTTCATGGATAGTCGACGTCGGTCGGTGT	314	839.87	342.37	3e-23	0.6923	uncharacterized protein LOC109794148 [Cajanus cajan]
20	MeJ-RDA_contig_2683	CTTCTGAAGCCACCCTTTCCAGTTGTATTGCAGGACTGTACAACCTTAATGCTTCCAGCAACACCATATTCACCATTTTTAACTTTGATAGCATATCTGCATCAGGAATTTCCATGCCACAAATCTGATGAACCTCTTGTCTAAGTTTATCTCGCCAGTCCTTGTGCAAACTCAATAAAAAGACAGTCCAACTAAGTAAGTTTGAAGTGGTCTCATGACCAGCAAAGAAAAAGGTCTTGCATTCGTCCATGATTTCATTCATCTTCAACTTAGGAATATCAGTTGTTTTTTCTGTATCCATCATTACCC	309	30.65	12.12	2e-43	0.6562	cytochrome p450 734a6-like protein [Trifolium pratense]	6.39e-27	At: CYP734A1, BAS1	C-26 hydroxylation	1.42e-07	leaf_contig_10594
21	MeJ-RDA_contig_1662	CCATGAACAGATCTCACACTCTTCGGTACATTTTCTCTTTACCACAGGTAGTGGTGGGTGCATGCGGAATGCTTCCTTCACCATGGCTCTAATGTAAGGAAGATTTTGAACATCTGATTCATCAACAAGTCTATCTTTTCCCACAACAGAGTCAATCTCCTCTCGAGCTTTCTTCAACACTCTAGGATTGTTGATGAGCTCTGCCAAAGTCCATTCTGTTGCCACAGCGGTGGAGTCCGTCCCTGCTGAGAAGAAATCGACAACAAGTCCCTTGATTTGTTCCTTTGTAATTTTGATCTGTTCA	304	109.06	43.12	3e-58	0.94	isoflavone synthase [Pisum sativum] CYP93C18	6.79e-13	Mt: CYP97B1	C-16 hydroxylation	9.97e-92	stalk_contig_2652
22	CHL-RDA_contig_1930	GGGGGCGGCGGAGAACGACCCGAACTGCAAGTGCACCTCGAACTGCACCTGCTTCCTCGTTAACATGTGGGCTATCGGACGGGACCCGGAAGCTTGGAAAGACGCCGATACCTTCGTCCCCGAGCGTTTTTCGGATAACGACAGCGGCATCGACTACAAAGGGCGTGATTTCGAGTTGATACCGTTCGGCGCCGGGAGGAGAATGTGCCCTGGGCTCCAGCTTGGGGAGCGGATGGTTCACATGATTTTGGCGTCACTACTGCGGTCGTCTGAGTGGAA	279	15	6.12	1e-28	0.6753	cytochrome P450 83B1 [Medicago truncatula]	2.4e-12	St: CYP72A188, PGA2	C-22 hydroxylation	3.39e-116	root_contig_454
23	CHL-RDA_contig_1583	GTTTGAAAGGGATGGCTTTTTGGGAGTATGGTTCGTATTGGCGTAGTGCGAGGAAACTTTGCAATTTGAAACTTCTTAGTGCTTCCAAAGTTGATATGTTTGGTCCTATTAGAAAGCATGAGTTGGGTGTTTTGGTAAAGCCTTTGGAGAAAGCTGCTTTGGTGGGTGACGTTGTGGATGTTAGTGAGGTAGTAGACAATCTTGTAGAGGAAATTGTGTATAAGATGATATTGGGTCGGAGTAAGTATGAGAATTTTGATTTGAAGAGAATGGT	274	7.64	3.11	3e-26	0.7416	cytochrome p450 71a1-like protein [Trifolium pratense]
24	SQ-RDA_contig_3681	ATCCATGAACAGTGCAAACGCATGGTCTCCTTCACGATGGCCTCGATGTAGGCGAGGCGGACAATGTCCCGCTCCTCGACCCAACGGCCGTCCCCGATGACGCGTTCGAGCTCCTCGGCAGCACGGGAGAAGATGTGGGGGTGCTTCAGGAGCTCCGAGATTGCCCATTCCACCGTCACCGCCGAGCTCTCTGTGCCGCCCGCAATCAAGTCCTGACTGAATGCCTTAACGCCGTCGCGGTGAAGTTTGACGTCGGTGTTCATGGA	266	25.84	9.13	4e-36	0.7952	cytochrome P450 71A1-like [Gossypium hirsutum]	1.31e-10	Gg: CYP88D6	C-11 hydroxylation	2.64e-117	leaf_contig_6135
25	MeJ-RDA_contig_3353	TCCATGAACAGTTCTGGTGCATGTAAACGCATGGTTTCTTTAATAACTGATTTCGAGTATTTGAGCTTGTGGAGACTTAGTTCATCCACATACCCTTTCTCGTTATAGACACTTCTTACTTCAACTTGTGCTTTCTTCATTACTTGTGGATTTTTAATCAATTCTGACATTGCCCATTCTAGAATTGTAAATGTGGTGTCACTTCCAGCACAAAATTGTTGCTTTGACTATGGTGTCTGATAAGGGATGTTCGAGATCTGTTCATG	266	0	0	1e-31	0.8955	cytochrome P450 71D9 [Medicago truncatula]	2.45e-11	Mt: CYP97B1	C-16 hydroxylation	0.03	stalk_contig_14731
26	MeJ-RDA_contig_3579	GAACAGATCACTCGAGTTGTATATTTAAGTTTCTTCATGTCTTCAATAGATGGAAATCGGTCACCAAGTACAGAGTCAACCTCTTCTTGGAGCTTGGACATGACACTAGGCTCCTTTGAAAGAAGATAAAAGGTCCAAGTTAAAACAGCGGCTGATGTTTCATGTCCAGCAATGAGCATTGTCATTAAGTCATCACGAAGTTGCTTACTTGTCACATCATCTCCTGACGCCAACAAGAAGTGAAGAATACTTGGATCTGTTCATGG	266	8.9	3.52	1e-46	0.9405	Glycine max cytochrome P450 monooxygenase CYP97C10 (CYP97C10) mRNA. partial cds	1.88e-27	Mt: CYP97B1	C-16 hydroxylation	1.28e-70	leaf_contig_458
27	CHL-RDA_contig_1929	GCGGCCGAGCACGTCGCGGACGCGACCCGGAAGCTTGGAAAGACGCCGATACCTTCGTCCCCGAGCGTTTTTCGGATAACGACAGCGGCATCGACTACAAAGGGCGTGATTTCGAGTTGATACCGTTCGGCGCCGGGAGGAGAATGTGCCCTGGGCTCCAGCTTGGGGAGCGGATGGTTCACATGATTTTGGCGTCACTACTGCGGTCGTTTGAGTGGAAGCTGCCCGACGGGATCTGCGGTGAGAGGCTGGAGTGTTCATGGA	264	396.4	161.59	2e-28	0.641	cytochrome P450 83B1 [Medicago truncatula]	2.9e-12	St: CYP72A188, PGA2	C-22 hydroxylation	2.45e-111	root_contig_454
28	MeJ-RDA_contig_2854	GTACGTGACCCAACAAAATTTTGGGAACTTCAATCCACCCTTGCTAATTCCACCTCTTTGGGCTTTTCAGCTAACTACATCATTGGCAACTTCATAGTCTTCATTAGAGACACAGAACTCTCTCATAAAATCTTCACAAATGTAAAGCCCAACGCTTTTCATCTCGTGGGCCATCCTTTTGGTAAGAAACTCTTTGGTGAACACAATCTTATTTACATGATGGGCCAAGAACACAAGAATCTCCGCCGTCGGATCTGTTCATG	263	45.02	17.8	2e-49	0.907	cytochrome P450 710A11-like [Cicer arietinum]
29	MeJ-RDA_contig_1198	AACGGTAACAGTTCGAAATTGTGCCCTTTGTAGTCAATGCTGCCGTCCGCATCTAAAAACCTCTCGGGGATGGAAGAATCCGCGTCTTTCCAAACGTCCGGGTCCCGCCCGATGGCCCACACGTTGACAAGCACGCGGGCGTGCTTCGGGATTGTGTAGCGCCCTAATTGGACGGTGGACTCCGTCCGGTGGGGGACGAGGAAGGGTACAGGGGCGTGGAGGCGGAGCGTCTCCTTCACGACCGCTTCGAGGTAGGGG	258	36.71	14.52	1e-06	0.8689	Rhodamnia argentea cytochrome P450 71B10-like (LOC115749337), transcript variant X3, mRNA	8.15e-09	Vc: CYP94N1v2	C-26 hydroxylation	7.34e-80	root_contig_454
30	SQ-RDA_contig_1572	CTCCCTCGCCGCGCGAAAGGACTCCACGCGCTTCGAGCTGAAGAGCTTCATGGTGCATCTCTTGCGCGCCTCCCGCCAGTACTGGCCGTAGGGTGCGAAAGTGATGTCGGAGAGGCCGTAAGAGAATTTTTCACCAACGTAGAGGACCGGGCGGCCTGAGAAGGTGATGTCGTAGGCCGGGAAAATGGATTTAAGGGCAGCGGCGGAGGAGATGACAAGGCTGGGCACGGAACCGAGCTGGAGGGACATGAGGGGCC	257	0	0	8e-30	60.00%	cytochrome P450 71A9-like. partial [Quercus suber]				1.95e-131	stalk_contig_2602
31	SQ-RDA_contig_2435	GAACAGATCGGCGTGTGCAGCCTCAGCGACTCCTTCACCACCGCCTGCAGGTACGGAAGCCGGCCCAGGCTCGACTCGCTCACCGCCTCGCCGCCGAGCACGTCCTCCATCTCTCGCCGGAGCTTGTCCTGCACGCCGGGGTAGTTCGCTAGCTCGGCGATGGCCCACTCCATGGACCACAGCGTCGTCTCGATGGCCGCGACATTGATGTTCTCCACAATGTAGCTCACGTTATCGGCCGTGATCTGTTCATG	254	59.53	21.03	3e-36	0.7901	cytochrome P450 CYP73A100-like [Ananas comosus]	4.4e-08	Mt: CYP97B1	C-16 hydroxylation	2.68e-123	stalk_contig_991
32	SQ-RDA_contig_4630	GGATGGTAAATGGGATTACAGTGGGAATGACTTCAATTATTTCCCTTTTGGCTCTGGAAGAAGGATTTGTGCCGGAATAGCAATGGCTGAGAGAACAGTTTTGTATTTTGTAGCCACGCTTGTGCACTTGTTTGATTGGACAGTACCTCAAGGAGAAAAGTTGGAGGTGTCGGAGAAATTTGGTATTGTTCTAAAAAAGAAGACACCTCTGCTTGCCATACCCACACCACGACTATCCAAACCAGATCTGTTC	253	16.3	5.76	3e-47	0.8452	Cytochrome P450 76C1 [Glycine soja]	1.11e-08	At: CYP90B1, DWF4	C-22 hydroxylation	0.000206	stalk_contig_2652
33	MeJ-RDA_contig_2373	GTTCAAGATTTAGATGGTCGTGATGCTGATACTACAGTCAAAGCTACGTGTATGGCACTAATTCTAGCGGGTACAGGCGCAATGTTTCTTTGATAATGGCTTGGAGATACTCTAACTTTGTCAAATCTGATTTTATTGCCATCTTTTCCATACCAATTTGTGTATCTAATTCTTTAATCGCTTTGTTTAGGACTTCACGATCGTTAAGAAATAAAGATAGAGTCCAAGTCAATGTTACTGCGGTAGTGTC	250	0	0	8e-23	0.7869	cytochrome P450 CYP82D47 [Medicago truncatula]	9.23e-10	Mt: CYP97B1	C-16 hydroxylation
34	MeJ-RDA_contig_1473	ATGAACAGATCACGGCCGATAACGTGAGCTACATTGTGGAGAACATCAATGTCGCGGCCATCGAGACGACGCTGTGGTCCATGGAGTGGGCCATCGCCGAGCTAGCGAACCACCCCGGCGTGCAGGACAAGCTCCGGCGAGAGATGGAGGACGTGCTCGGCGGCGAGGCGGTGAGCGAGTCGAGCCTGGGCCGGCTTCCGTACCTGCAGGCGGTGGTGAAGGAGTCGCTGAGGCTGCACACGCCGATC	248	210.07	83.06	1e-36	0.8025	Cytochrome P450 CYP73A100 [Ananas comosus]	2.17e-08	Mt: CYP97B1	C-16 hydroxylation	6.15e-125	stalk_contig_991
35	SQ-RDA_contig_4452	CTCACCGCAGATCAAAGAAACTCTTCGCCTTCACATCCCGGTTCCCTTATTAGTCCCTCGGAAATCGATGGAAGATATCAAACTAGATGGCTATGACATTGCAGCTGGTACACACATATTAGTTAATGCTTGGGCAATTGCAAGAGACTCTTCAAGTTGGGAACAACCTCTAGAGTTTAAACCAGAAAGGTTTATGAATAGTTCGATAGATTATAAAGGATTGGATTTTGAACTGATCTG	240	17.18	6.07	1e-43	0.9079	cytochrome P450 family 71 protein. partial [Medicago truncatula]	2.05e-11	Vc: CYP94N1v2	C-26 hydroxylation	0.00829	stalk_contig_14038
36	MeJ-RDA_contig_3392	CGACTATCCATTAACAGATCAAAAACATTGGAATGATGCTTTGAGTTTTAAGCCAGAGAGATTTGAAACAGAAGGGGAAGTGAACAAATTGATGGCATTTGGGTTAGGAAGAAGGGCTTGTCCTGGATTAAGCTTGGCCCTACGTATAGTGGGCATTACTGTGGGCTTGTTGGTCCAATGCTTTGAATGGGAAAGAGAGAGTGAAGAAAAACTTGATATGATGGAGGATAAAG	233	0	0	4e-33	0.7778	cytochrome P450 monooxygenase [Cicer arietinum]	8.39e-11	Sl: CYP724B2	C-22 hydroxylation	4.44e-25	stalk_contig_3365
37	SQ-RDA_contig_1936	CCATGAACAGATCAGCTGGCAGCTTGAAATTTGATGGCCTGATAAAATAGGAGCCCAACTACAGTCACGGCTTTCCTCTGAGGGAATAGCATTCTTCATCCAGGTTGAACATACTCCTTTGTGAATTCTGCCAGTCGGAGTTGGACCTTCTACCAGGGCACAAGTTACATGTACCCTTTGTGGGGCAAGCCTAGGAGAGGATGAAATAGAATAATAACGAGGCTGTAAAC	230	17.93	6.33	1e-36	0.9677	NADPH--cytochrome P450 reductase [Medicago truncatula]
38	MeJ-RDA_contig_2750	CATGAACAGATCAGACACATCCTCCAACACAATTGAGTTTGTAATGGCAGAAATGATGAACAAACCAGAAGTGATGAGGAAGGTTCAAGAGGAATTAGAAACTGTGGTTGGAAATGATAACTTAGTAGAAGAGTCTGATATTCACAAGCTACCCTACTTGCATGCAGTGATGAAAGAAACACTTCGTTTACACCCAGCACTTCCACTTTTAGTCCCTCACTGCCCAAGT	229	51.48	20.35	6e-40	0.9211	cytochrome P450 monooxygenase CYP706A12 [Medicago truncatula]	2.54e-08	Mt: CYP97B1	C-16 hydroxylation
39	SQ-RDA_contig_1903	TCCATGAACAGATCGTCTGTATGAGGAGGTCCTAAATATATGTGGACATGAAAAGGTTACAGACGACCAATTATCTAAGCTTCCTTACTTGGGGGCTGTATTCCATGAAACTCTGAGGAAGCACAGTCCAGTTCCTATTGTCCCACTAAGATATGTTCATGAGGATTCCGAATTGGGAGGATATCATATTCCTGCTGGAAGCGAGATTGCAATAAATATATACGG	225	61.1	21.59	4e-36	0.8451	cytochrome P450 monooxygenase CYP701A16. partial [Glycine max]	1.87e-12	At: CYP734A1, BAS1	C-26 hydroxylation
40	CHL-RDA_contig_1964	CATGAACAGATCCTCCCACGAGTCTTTGTCTCTTCCTATAGCCCACACGTTTATCATCACGCGTGAGCCTCTCGGAACAAAATAACCACCAACCTTGGCGTCCTCTGCAGTCTCGTGGAGGAGAAGGGGAATCGGCGGGTGAAGACGCAAAGTCTCTTTGACGGCACATTTTAGATAGGTGAGTTTCTCGATGTCTGATTCCTCCACACGCTGATCTGTTCATGG	225	65.12	26.54	8e-27	0.9565	cytochrome P450 84A1 [Medicago truncatula]	9.39e-08	At: CYP86A2, unspecific monooxygenase	C-16 hydroxylation	0.03	root_contig_8479
41	SQ-RDA_contig_4161	TCCATGAACAGATCCCGTTTGGCCACGCACGGCGAAGATGCCCCGGGGAGGGCCTGGCGGTTAGGCTGGTGGGGCCCGCGCTCGGTGCGCTGCTACAGTGCTTTGAGTGGGAGAGGGTCGGGGGAGTGGAGGTCGACATGAGTGAGGGCCCGGGGCTCACCATGCCCAAGGCCCGGCCGTTGGAGGCCATGTTCATGCCACGTGGAGACATGATCTGTTCATGG	224	24.55	8.67	9e-27	0.75	cytochrome P450 81D1-like [Phoenix dactylifera]	5.47e-05	Ml: CYP87D16	C-16 hydroxylation	3.75e-32	stalk_contig_567
42	CHL-RDA_contig_783	CCATGAACAGATCACTCATGGCCGCTTCCAGCAGTAACTGCATCAAATCCTTTTCTGATGAGCATTCTCGCTTACGTTCCTCCACTAACTCCCATATCACTGACTCTATCTCGCTCTCCAAACTGCTTATCTCATTTTCCTTCTTTGTTCGAAATTTCAGTTTCTCCAGGAAGCCGCTCTGTCGAAAAAGGAAGCCATGGTTGGACATGGTCTGTTCATCGA	222	47.14	19.22	3e-18	0.8986	cytochrome P450 714A1 [Medicago truncatula]
43	CHL-RDA_contig_3050	CTATCCATGAACGATCAACGACGATGGGGGGTTGAAGCACGTGAGCCCGTTCAAGTTCCCGGTGTCTCTTGCAGGGCCGAGGGTGTGTTTGGGGAAGGAGACGGCGTACGTGCAGATGAAGGCTGTGATTGCAACTGTTTTGGAGGGTTTTGATGCCAATTGGGCGGAGGAGGATGAGAAGAAGATGGAGTACGAGTTCCTCCAGGCGCTGCTGCCCATC	220	0	0	2e-11	0.6957	cytochrome P450 94B3 [Prunus persica]	9.27e-15	Vc: CYP94N1v2	C-26 hydroxylation	1.12e-95	leaf_contig_707
44	CHL-RDA_contig_2089	GAAGAGGCAGAAAGAATACTAGGTTTGTCACCAGACACCTATTTCTCTGTCCATACCGACGACGAAGATGGGAAACCTCTTGGTGGAAGCTCCTTGCCTCCTCCTTTCCCACCATGTACTTTAAGAACAGCACTTACTAAATATGCAGATGTTTTGGGTTCACTTAAAAAGTCTGCCTTGCTTGCCTTAGCTGCTCATGCATCTGATCTGTTCA	214	48.9	19.93	1e-15	0.9804	NADPH-cytochrome P450 reductase-like [Trifolium medium]
45	MeJ-RDA_contig_2568	CTACGGCCCCCTCCTCCTCCTCCGCTTCGGCTCCCGCCGAGTCCTCGCCGTATCCTCCGCCGCAGTCGCCGCCGAAATATTCACCGCCAACGACACCGCCTTCGCCAACCGCCCGCGGCTCCTCACCAGCAAGTACCTCAGCTACGACTACCAAACCCTAATCGCCGCCAGCTACGGCCCCCACTGGCGCCACCCCCGCCGGATCTGTTCATG	213	22.24	8.79	2e-19	0.6286	Cytochrome P450 81E8 like [Actinidia chinensis var. chinensis]				1.02e-32	stalk_contig_567
46	SQ-RDA_contig_3453	GTAAGCAACTTCGTGATGACTTAATGACAATGCTCATTGCTGGACATGAAACATCAGCCGCTGTTTTAACTTGGACCTTTTATCTTCTTTCAAAGGAGCCTAGTGTCATGTCCGAGCTCCAAGAAGAGGTTGACTCTGTACTTGGTGACCGATTTCCATCTATTGAAGACATGAAGAAACTTAAATATACAACACGAGTGATCTGTTCATGG	212	19.45	6.87	2e-35	0.9701	cytochrome P450 monooxygenase CYP97A10. partial [Medicago truncatula]	1.62e-24	Mt: CYP97B1	C-16 hydroxylation	1.95e-54	leaf_contig_458
47	SQ-RDA_contig_2310	AACACACTCAATTAGGAGGATACAACATTCCTGCCGGGACCGATATTACCGTCAACCAGTATGCGTGCAACATGGACGACAAGGACTGGGATGAGCCGAAAAGTTGGAACCCGGAGAGGCTCATGTCGTGCAAGTACGACCCCGCGGACATGTACAAGACGATGGCTTTCGGTGGGGGGAAGAGGGTCTGCGCGGGATCTGCGGTGA	207	26.56	9.38	2e-33	0.8154	ent-kaurene oxidase. chloroplastic [Dendrobium catenatum] CYP701	7.11e-10	Mt: CYP97B1	C-16 hydroxylation	1.67e-23	root_contig_13759
48	SQ-RDA_contig_3964	ATCCATGAACAGCTTGGAGGAGGTATCTTCAACTCAGATGGTGACACGTGGCTGTTCCAGCGTAAAACCGCCGCACTAGAATTCACCACCCGTACCCTACGACAAGCCATGGCTCGTTGGGTTAGTAGAGCCATAAAGTTTCGTTTCTGTCCTATATTAGCCACGGCTCAGGAAGAAAAAAACCCGGTTGATCTGTTCATGG	202	40.83	14.43	2e-34	0.9219	cytochrome P450 86A2-like [Trifolium medium]	1.05e-33	At: CYP86A2, unspecific monooxygenase	C-16 hydroxylation	8.42e-21	stalk_contig_5333
49	SQ-RDA_contig_174	TTTCTCTGTCCATACCGACGACGAAGATGGGAAACCTCTTGGTGGAAGCTCCTTGCCTCCTCCTTTCCCACCATGTACTTTAAGAACAGCACTTACTAAATATGCAGATGTTTTGGGTTCACCTAAAAAGTCTGCCTTGCTTGCCTTAGCTGCTCATGCATCTGATCTGTTCATGGATAGTCGACGTCGGTACGGAAGAG	200	75.61	26.71	3e-09	0.8594	NADPH-cytochrome P450 reductase-like [Trifolium medium]

## Sheet: Table S4
Table S4. Reference genes used for selection of candidates catalyzing stages in synthesis of jervine.
Gene name	Sequence	Sequence length	Function	Species	Nucleotide Seq Nr	Protein Seq Nr
CYP90G1v3	ATGACTCCATTAGTTGTTCTCTTCTTTCTGTTCCCTACACTACTAGTGTTGGTGGTTGCAGCATTTGGGCAGCTAGCAGGCAAGGATGATGGGTGGAGGAAGAGGGGGCTGAGGCTCCCACCGGGCACCATGGGTTGGCCGCTCGTCGGAGAAACCCTGTCCTTCGGAAAGATCCACCCCAGCACTTCCATCGGAGACTACCTCGAGGAGCACATCCACAAGTACGGAAAGATTTTCAAGGCGAACTTGTTCGCATCTCAGGCGGTGGTTTCGGTGGACGCGGAGCTGAACCGGTTCGTGATGCTGAATGACGGGCGGCTGTTCGAGCCGTGCACCCCGAAGGGGGTGCTGGACATCCTGGGGCACGCGACGCCGATGGCGTTGTCGGGTGATCTGCAC…	1464	C-22 oxidation	Veratrum californicum	KJ869260.1	AJT59566.1
CYP90B27	ATGGCGATGGAGCTCTTATTGTTGATCCCTGCGTTTATCGTCGCCATCATCATCTTCTTCAGCTTCAAGTCGACAAACGGGACGTCGACAAAACCGCTGAAACTCCCGCCGGGCCAAATGGGTTGGCCTTTCATCGGCCACACCATACCCTTCATGCAGCCCCACTCCTCCGCATCCCTCGGTCCCTACATCGACCTCAACACCGCCAGGTATGGGACTATATTTCGGATGAACTTGTTGGCGAAACCGACGATTGTGTCGGCCGACCCCGAGTTCAACCGGTACATACTGCAGAACGAGGGCCGGCTTTTCGAGAACAGCTGCCCGACGAGCATCGCGGAGATCATGGGCCGTTGGTCGATGCTCGCGCTCACCGGAGACGTTCACCGCGAGATGCGG…	1454	C-22 hydroxylation	Veratrum californicum	KJ869252.1	AJT59558.1
CYP90B1, DWF4	AACAAAAGTAATGAACACGGAGAAACAAAAGCCATGAAGCTCATTGGTTAGGTTTAAGCTTAATAAGAAGATTTTATTAAATTTTAATGACGATGATAACAATTATATTTTCTGACTTCTTTAAAACCCCCTCTTACAAACAGAAGCTCCCTTTTTCAGTAGAAGTCCGATTCCCAATCTTAAAGACAAAGCCATTAGAAAGAGAAAGTGAGTGAGAGAGAGAGAGAAACTAGCTCCATGTTCGAAACAGAGCATCATACTCTCTTACCTCTTCTTCTTCTCCCATCGCTTTTGTCTCTTCTTCTCTTCTTGATTCTCTTGAAGAGAAGAAATAGAAAAACCAGATTCAATCTACCTCCGGGTAAATCCGGTTGGCCATTTCTTGGTGAAACCATCGGT…	2092	C-22 hydroxylation	Arabidopsis thaliana	NM_114926.4	NP_190635.1
CYP90B1, DWF4	AACAAAAGTAATGAACACGGAGAAACAAAAGCCATGAAGCTCATTGGTTAGGTTTAAGCTTAATAAGAAGATTTTATTAAATTTTAATGACGATGATAACAATTATATTTTCTGACTTCTTTAAAACCCCCTCTTACAAACAGAAGCTCCCTTTTTCAGTAGAAGTCCGATTCCCAATCTTAAAGACAAAGCCATTAGAAAGAGAAAGTGAGTGAGAGAGAGAGAGAAACTAGCTCCATGTTCGAAACAGAGCATCATACTCTCTTACCTCTTCTTCTTCTCCCATCGCTTTTGTCTCTTCTTCTCTTCTTGATTCTCTTGAAGAGAAGAAATAGAAAAACCAGATTCAATCTACCTCCGGGTAAATCCGGTTGGCCATTTCTTGGTGAAACCATCGGT…	2844	C-22 hydroxylation	Arabidopsis thaliana	NM_001339479.1	NP_001327730.1
CYP90B2	ATGGCCGCCATGATGGCGTCCATAACCAGCGAGCTGCTCTTCTTTCTCCCCTTCATCCTCCTTGCCCTGCTCACGTTCTACACCACCACCGTGGCCAAATGCCACGGCGGGCACTGGTGGCGAGGTGGGACGACGCCGGCGAAGAGGAAGCGGATGAACCTGCCGCCCGGCGCCGCCGGGTGGCCGCTCGTCGGCGAGACGTTCGGCTACCTCCGCGCCCACCCCGCCACCTCCGTCGGCCGCTTCATGGAGCAGCACATCGCACGGTACGGGAAGATATACCGGTCGAGCCTGTTCGGGGAGCGGACGGTGGTGTCGGCGGACGCGGGGCTCAACCGGTACATCCTGCAGAACGAGGGGAGGCTGTTCGAGTGCAGCTACCCGCGCAGCATCGGCGGC…	1521	C-22 hydroxylation	Oryza sativa	osa:4332134	Q5CCK3.1
CYP724B	ATGGTGGGAGGAGAGCTTGTGCTGGCTGCTCTGGTGATCCTGCTTGCTTTGCTGCTGACCCTGGTGCTGAGCCACTTCCTGCCTTTGCTCCTGAATCCCAAGGCTCCCAAGGGAAGCTTTGGGTGGCCTCTCCTTGGTGAGACGCTGAGGTTCCTCAGTCCTCATGCTAGCAACACCCTGGGCAGCTTCCTGGAGGATCACTGCTCCAGGTATGGGAGGGTGTTTAAGTCCCATCTGTTCTGCACCCCCACCATAGTGTCCTGTGACCAGGAGCTGAACCACTTCATCCTTCAGAATGAGGAGAGGCTGTTTCAGTGCAGCTACCCCAGGCCAATTCATGGCATTCTGGGCAAGTCCTCCATGTTAGTGGTCCTAGGGGAGGACCACAAGAGGCTCAGG…	1443	C-22 hydroxylation	Oryza sativa	osa:4336116	osa:4336116
CYP90B3	ATGTCTGACTTAGAGTTTTTTCTTTTTCTTATTCCTCCAATCTTAGCAGTACTTATAATTCTTAATCTATTCAAAAGAAAACACAACTTTCAAAATCTTCCACCAGGGGATATGGGTTGGCCTTTTCTTGGTGAAACTATTGGTTATTTGAGACCTTATTCAGCTACTACTATTGGAGATTTCATGCAAGATCATATTTCTAGGTATGGGAAAATTTTCAAGTCAAATTTGTTTGGAGAGCCAACAATAGTTTCAGCAGATGCAGGGCTAAACAGATACATTCTGCAGAATGAAGGGAGATTATTTGAGTGTAATTATCCAAGAAGTATAGGTGGGATACTTGGTAAATGGTCTATGTTAGTTCAAGTTGGACAAATGCATAGAGATATGAGGATGATT…	1476	C-22 hydroxylation	Solanum lycopersicum	sly:101256342	sly:101256342
CYP72A186, GAME7	ATGGACGAAATTCAAATATTAGTAAGAGTGTGTTGTTCTGCCATAGCAATTGCTCTGTTTGTGTGTCTGTGGAAAGTACTAAATTGGGTTTGGCTCAATCCGAAGAAGTTGGAGAATTTGTTGAGGAAACAAGGGCTAAATGGGAACTCTTACAAAATATTGTATGGGGATTTGAATGATTTTATTGGAATGATTAGGGAAGCTAGTTCAAAACCTATGAATTTGTCTGATGATATAGCTCCAAGATTGGTGCCTTTCTTTCTTGAGACCACCAAGAAATATGGGAAAAAATGTTTTATATGGTTGGGTCCAAAACCACAAGTAATAATCATGGACCCTGAGCTTATTAAGGAAGTACTCTCGAAAACCTATTTGTATCAAAAGCCCGGTGGAAATCCA…	1560	C-22 hydroxylation	Solanum lycopersicum	NM_001365978.1	NP_001352907.1
CYP724B2	ATGGGTGAAGAAGGTAGTCTTTTGATAATTGTTATCACCCTAGTTTTTAGTTTTGTAATTGGCATAACATTAAACCATTTTTGGCCTTTGTTCTTCAATAATTATGGTACTACTCTTCATGTTATTCCCAAGGGCACTTTTGGATGGCCTTTACTTGGTGAAACCCTTTCCTTTTTGAAGCCTCATCCTTCTAATTCTATTGGTACTTTCCTTCAACAACATTGTTCTAGGTATGGGAAAGTGTTCAAGTCACATTTATTTTTCTCCCCAACAGTGGTGTCATGTGACCAAGACCTTAATTACTTCATATTACAAAACGAAGATAAGTTATTTCAGTGTAGTTATCCAAAGCCAATTCATGGTATACTTGGCAAAGTTTCATTGCTTGTGGCTGTTGGC…	1443	C-22 hydroxylation	Solanum lycopersicum	NM_001279143.1	NP_001266072.1
CYP72A188, PGA2	ATGGGTATTGCAGTTTTCATTGCTTTGGCCGTATGTTTGCCTTTCAGTTTTTGGTGCCTAAAATTGCTCTACTTTGTATGGTGGCGTCCCAAAACAGTAGAAAATGAACTGCGGCAGCAAGGAATATATGGGCGTCCCTATAGATTTCTATTTGGAAATCTAAAGGAGATGATAGAGATGAATAAAATAGCCAAGTCTAAACCCATGCCATTGCACCACGATTTCACACCTCGACTTAATCCATTGTTCTATGAACTGGCCACCACTTACAAGAAACTTTACTTGTTTTGGCTAGGACCGATACCTCGATTAACCATTTTGGATCCCAAGTTAATTAAGGAAGTACTGTCAAACAAATCGGGTGAGTTCAGAAAACCAAACATCAGCGCTTTCCTGAAG…	1554	C-22 hydroxylation	Solanum tuberosum	AB839753.1	BAV14872.1
CYP94N1v2	ATGGATCTACCCTCCGCCTCAGCCGCCGTCGCCGCCGCTACCGCTGCCGTAATCTTCCTCCTCACTATCTACCTCCTCCCGAAGAAAAAATCTCCGGCGTCGACCGGAAAGAACGGATCCACATCCCTGGAGAGCTACCCAGTAATCGGCAACCTCCCCCACTTCGTCAAGAACCGCAACCGCTTCCTCGACTGGGTGGCGGAAATAATATCCCAGAGCCCCACCGGCACCGTCATCGCCGCCCCCTTGGTCTTCACCTCCAACCCCGAGAACGTCGAGCACACCGCCAAGTCCCGCTTCGACGCCTACGCCCGCGGCCCCGCCGCCACCGCCGTCCTCCACGACTTCCTCGGCAGCGGCATCCTCAACGTCGACGGCGACAGCTGGCGGGCCCAGCGG…	1545	C-26 hydroxylation	Veratrum californicum	KJ869255.1	AJT59561.1
CYP734A1	ATGGCCGCGCTGCTGGGCATCCTCCTCGCGGCCTTCCTCGCCGCCGCCGCCGTCCTTTTTGCGCTCCGCCTGCTCCACTCCTTCCTGTGGGTCCCGCGCCGCCTGGAGCGCCGGTTCCGCCGGCAGGGCATCCGGGGCCCGCCGCGCCGCCCGCTCTCCGGCAACGCCGCCGGCTACCGCGACCTGCTCGCCGCCGCCCAGTCCGCGCCGCTCGCGTCCTTCCACCACGCCGTCGTGGCCCGCGTCGCGCCGCACCACCGCGAGTGGCCCGAGCGGTACGGCCGCCCGTTCGTGTTCTGGCTCGGGCCCCGCCCGCGGCTGGTGGTCTCCGACCCGGAGGTCGTGAAGGCCGTGCTGACCGACACCACGGGGACCTTCGGAAAGGCTGGCCCCGGCGGC…	1533	C-26 hydroxylation	Oryza sativa	osa:4338753	osa:4338753
CYP88B1, GAME4	ATGGATTTCTACAATTTAGCCTTGTTCTTCATAGCTTTAATACTTGGAATTTTCACATTTTATGCCATATTAATGAGAATAAATGGTTGGTATTATGCAATCAAATTTTGTTCAAACAAATATAACATCCCAAATGGTTATATGGGTTTGCCATATTTTGGTAACACACTTTCTTACTTCAAAGCTTCAATGTGTGGTGATCCAAAATCATTCATTGATTTCTTTGCTACTAGGTTTGGAGAAGGAGGAATGTATAGGGCATACATATTTGGGAAGCCAACAATTATGGTGACAAAGCCAGAAATAATTAGAAAAGTTTTGATGGATGAAGAGTATCTTGAAAGAGGTTTGCCTAATTATATGAAAAAATTAATTGGATTAACAACTTCGATAGAAGAA…	1464	C-26 hydroxylation	Solanum lycopersicum	NM_001365974.1	NP_001352903.1
CYP734A1, BAS1	ATGGAGGAAGAAAGTAGCAGCTGGTTCATTCCAAAGGTTCTTGTTCTGTCTGTAATCTTAAGTCTTGTAATAGTGAAGGGTATGTCTCTGTTATGGTGGAGACCAAGAAAGATTGAAGAACATTTCTCTAAACAAGGAATTCGAGGTCCTCCTTATCATTTCTTCATCGGAAATGTTAAAGAACTTGTTGGAATGATGCTTAAAGCTTCTTCTCATCCTATGCCTTTCTCTCACAATATTCTTCCTAGAGTTCTCTCTTTTTACCATCACTGGAGAAAAATCTACGGTGCTACATTTCTGGTTTGGTTCGGTCCAACTTTCCGGTTAACGGTAGCCGATCCTGATTTGATCAGAGAGATCTTCTCTAAGTCTGAGTTCTACGAGAAGAATGAAGCTCAC…	1563	C-26 hydroxylation	Arabidopsis thaliana	NM_128228.4	NP_180239.1
CYP734A7	ATGGAAGGATTTTGCTTTCAATGGTTATGTGTTATTCTATTTTTGTATGTGTTACTGTTGTGTATACAGAAAGCATTTGTTCATCTTTGGTGGACACCAAAAATAATTCAAAAACACTTCAAGAAGCAAGGTATCACAGGTCCTAAATACCATTTTCTCTTTGGTAACCTCAAAGAAATTGCAAGTTTCACTACTCCATCTTGGCCTTCCACTTTTACCTCTCATGACATTCTTCCCAATGTTCTCCCCTTCTACCATCATTGGAAGAAAATCTATGGTTCAATATTTGTTATATGGTTTGGACCAACGGCTCGTGTCACCATTTCTGATCCAGCTTTAATTAGGGATATATTCGTCCTGAAATCAGATAATTTTGAGAAAAATGAGTCACCAGCCCTT…	1548	C-26 hydroxylation	Solanum lycopersicum	NM_001247011.2	NP_001233940.1
CYP72A208, GAME8, PGA1	ATGAGTTACATTATTCTTTTCCCACTTATTCTCACAAACATAATCATCTTTTTATTATTCAATTCATCTTCAGCTGCAAATTCCATGTACAATGTCCAAACTTATGGAGCCAACTCCGATGGAAAATCGGATTCATCCAACGCGTTCGTTAGTGCATGGACTGCAGCGTGTGCATCTACTAGCGCGGCCACTATTTACGTCCCAAAGGGAAGTTATCTATTGAACAATGTATATTTCTTTGGCCAATCGTGCAAGAGTAATGACATAACGATACATATTGAAGGCACACTTATAGCTCCTTCTGATTATAACGTTATTGGTAAATCTGGTAACTGGATTAAATTTGAACGAGTCAATGGAGTTTCCATCGTTGGTGGAACACTAGATGGACAAGGTACG…	1194	C-26 hydroxylation	Solanum lycopersicum	NC_015449.3	NP_001307785.1
CYP87D16	CCTACTTATTCTAGAGAGAGGGAGGTAGAGAGAGAGGGGGAGGGAGGGAGGATGTGGGTAGTGGGATTAATTGGTGTGGCTGTGGTAACAATATTGATAACTCAGTATGTATACAAATGGAGAAATCCAAAGACTGTGGGTGTTCTGCCACCTGGTTCAATGGGTCTGCCTTTGATCGGGGAGACTCTTCAACTTCTCAGCCGTAATCCATCCTTGGATCTTCATCCTTTCATCAAGAGCAGAATCCAAAGATATGGGCAGATATTCGCGACCAATATCGTAGGTCGACCCATAATAGTAACCGCTGATCCGCAGCTCAATAATTACCTTTTCCAACAAGAAGGAAGAGCAGTAGAACTGTGGTACTTGGACAGCTTTCAAAAGCTATTTAACTTAGAA…	1596	C-16 hydroxylation	Maesa lanceolata	KF318735.1	AHF22090.1
CYP716A111	ATGGGCATAAATCGACTAAACCTATCGACTTTACTATTATACAAGTATACAACTATGGAGCTTATCTTTTCCATGTTTTTCCTCCTTGTAGTTCTCTTTCTTTCCACTCTCTTGTTCTTCTTCAATAGAAGTAAACGGGAATCGTGTAGGAGCAGTTTGAAGCTCCCACCAGGGCAATGGGGATGGCCAATCATTGGTGAAAGTCTTGAATACCTTAATAGTGGACTTAGAGGTGTCCCGGAAAAGTTTGTTCAAGAAAGAATGAAAAAGTTCTCTACTGCAATCTTTAAAACTTCATTACTAATGGAGCCGACAGCAGTTGTATGTGGCCCAGGAGGAAACAAGCTCTTATTTGCGAATGAAGATAAACTTGTTACGACTTGGTTTCCTAGTACAATC…	1488	C-16 hydroxylation	Aquilegia coerulea	KY047600.1	APG38190.1
CYP716Y1	ATGGAACTTTCTATCACTCTGATGCTTATTTTCTCAACAACCATCTTCTTTATATTTCGTAATGTGTACAACCATCTCATCTCTAAACACAAAAACTATCCCCCTGGAAGTATGGGCTTGCCTTACATTGGCGAAACACTTAGTTTCGCGAGATACATCACCAAAGGAGTCCCTGAAAAATTCGTAATAGAAAGACAAAAGAAATATTCAACAACAATATTTAAGACCTCCTTGTTCGGAGAAAACATGGTGGTGTTGGGCAGTGCAGAGGGCAACAAATTTATTTTTGGAAGCGAGGAGAAGTATTTACGAGTGTGGTTTCCAAGTTCTGTGGACAAAGTGTTCAAAAAATCTCATAAGAGAACGTCGCAGGAAGAAGCTATTAGGTTGCGCAAAAAC…	1580	C-16 hydroxylation	Bupleurum falcatum	KC963423.1	AHF45909.1
CYP716A141	ATGGATTCCCTCTTCATCATCATCTCTTTGGTAATCGTCATTTTGACCACAATCTTCATCCTCTCCAATCTTCTCTCCAAGAAAACAATACTATTACCAGGAAAGACAGGCTTGCCTCTCATAGGAGAAAGCATCGATTACTTCAACAAGCTCAGGACTGGAATCAATGAGAAATTCGTGATGGAAAGGAAGCTAAAATATGCTTCCGACGTCTTCAAGACATCGATCCTTGGAGAGAACATGGCGTTTCTCACCGGGCCGGAGGGAAACAAGTTCTTGTTCTCCAACGAGAACAAATTGGTTCAAGTGTGGTGGCCGAGCTCGGTCGACAGCATTATCAAGAAATCTCATAACAAATCAGCCCAAGCTGAATCGGCCAAGGTCCGCGTGTTGCTCCCA…	1446	C-16 hydroxylation	Platycodon grandiflorus	LC209200.1	BAX04008.1
CYP97B1	ATGGTTGCCGTCGCTATCTCCACCGTCACTCTCACCGGTGTCAATCTTCACACCAGATTTCACTCCTCTCGCTTTTCTTCTCATTCCAAACGCTCTTCTTCTACCATCAGATGTCAAGCGGTTAATGGTGATAAGAAGAAACAAAGTAGCAGTAGTAGTAGCAGAAATGTGTTTGACAACGCCAGCAATCTCTTAACAAACTTGTTAAGCGGTGGAAGTTTAGGGAATATGCCTATAGCTGAAGGTGCTGTCACCGATTTGTTTGATCGACCTCTCTTTTTCTCACTATATGATTGGTTCTTAGAGCATGGCTCTGTGTATAAACTTGCGTTTGGGCCAAAAGCATTTGTTGTTGTATCCGATCCCATCGTTGCAAGACATATTCTACGAGAAAATGCC…	1725	C16-hydroxylation	Medicago truncatula	XM_003610926.3	XP_003610974.1
CYP86A2, unspecific monooxygenase	ATGGATGTCTCCAACACGATGCTCCTTGTAGCTGTTGTTGCAGCTTACTGGCTATGGTTCCAGCGGATCTCAAGGTGGCTAAAGGGTCCACGTGTTTGGCCAGTTTTGGGCAGTCTTCCGGGTCTGATCGAGCAGCGTGACCGTATGCACGACTGGATCACTGAGAACCTCCGTGCGTGTGGCGGCACTTATCAGACATGTATCTGCGCCGTACCTTTCTTGGCAAAAAAGCAAGGTCTCGTGACCGTCACGTGCGATCCCAAGAACATCGAACACATGCTCAAGACCAGGTTCGACAACTACCCTAAAGGTCCTACGTGGCAAGCCGTGTTCCATGACTTCCTCGGCCAAGGTATCTTCAACTCCGACGGTGACACTTGGCTCTTCCAGCGTAAAACC…	1662	C-16 hydroxylation	Arabidopsis thaliana	NC_003075.7	NP_191946.1
16DOX_Sl	AAAAAATATTTGTTTTTAAAATGTGTAATTTTTAGTGGCATGCTCTAAAAAAAAATAAAATTATCTGAGCATCAGTTTTGGTTATGCAATTTCCTTCCCTATAAATGGCCCTCCATATCTCAAATGAGATATCAAACAATTTGCAGAAGTAGTAGTATTAACATTTAGAAGATAACTTTGTTTCCCAGATTGATTGTCAATGGCGGATCTTCTCTCGAACTGGTCAAGCACATTAGAAGCAGTTCCTAAAAGTCATTGCATCCCAGAGCATGAAAGACCATCAGATCCAGTTGAAATTGGCGACAGTATTCCAGTCATTGATTTGGGAAAAGCTAATGGTGAAGAACGAAGTGTTGTTGTTAAAGATCTGTTGAAAGCTTTTGAAGAATATGGGTTTTT…	1375	C-16 hydroxylation	Solanum lycopersicum	LC222744.1	BBD17782.1
CYP87D18	ATGTGGACTGTCGTGCTCGGTTTGGCGACGCTGTTTGTCGCCTACTACATCCATTGGATTAACAAATGGAGAGATTCCAAGTTCAACGGAGTTCTGCCGCCGGGCACCATGGGTTTGCCGCTCATCGGAGAGACGATTCAACTGAGTCGACCCAGTGACTCCCTCGACGTTCACCCTTTCATCCAGAAAAAAGTTGAAAGATACGGGCCGATCTTCAAAACATGTCTGGCCGGAAGGCCGGTGGTGGTGTCGGCGGACGCAGAGTTCAACAACTACATAATGCTGCAGGAAGGAAGAGCAGTGGAAATGTGGTATTTGGATACGCTCTCCAAATTTTTCGGCCTCGACACCGAGTGGCTCAAAGCTCTGGGCCTCATCCACAAGTACATCAGAAGCATT…	1000	C-11 hydroxylation	Siraitia grosvenorii	HQ128571.1	AEM42986.1
CYP88D6	ATGGAAGTACACTGGGTTTGCATGTCCGCTGCCACTTTGTTGGTATGCTACATTTTTGGAAGCAAGTTTGTGAGGAATTTGAATGGGTGGTATTATGATGTAAAACTAAGAAGGAAAGAACACCCACTACCCCCAGGTGACATGGGATGGCCTCTTATCGGCAATCTATTGTCCTTCATCAAAGATTTCTCATCGGGTCACCCTGATTCATTCATCAACAACCTTGTTCTCAAATATGGACGAAGTGGTATCTACAAGACTCACTTGTTTGGGAATCCAAGCATCATTGCTTGTGAGCCTCAGATGTGTAGGCGAGTGCTCACTGATGATGTGAACTTTAAGCTTGGTTATCCAAAATCTATCAAAGAGTTGGCACGATGTAGACCCATGATTGATGTC…	1000	C-11 hydroxylation	Glycyrrhiza glabra	KP851192.1	AKM97308.1
CYP716A47, PPDS-2	TTAGGTGATACGGCGGCAGCAATGGTGTTGTTTTTCTCCCTATCTCTTCTTCTCCTTCCCCTATTATTATTGTTTGCCTATTTTTCTTATACAAAACGCATCCCCCAGAAAGAAAATGATTCAAAAGCTCCCCTCCCCCCAGGTCAAACAGGTTGGCCTTTGATAGGCGAAACTCTTAATTATTTATCTTGTGTCAAAAGTGGGGTTTCTGAAAATTTTGTGAAATATAGGAAGGAAAAGTATTCCCCCAAAGTTTTCAGGACATCACTTTTAGGAGAACCGATGGCAATCTTGTGTGGGCCGGAGGGCAACAAATTCCTCTACTCAACGGAAAAAAAGCTAGTCCAAGTTTGGTTCCCGAGCAGTGTTGAAAAGATGTTCCCCAGATCTCATGGCGAA…	1551	C-12 hydroxylation	Panax ginseng	JN604537.1	AEY75213.1
GABAT2	ATGTTCTCAAGGCAAGCTACAGCAAGAATGTATCCTATGATGCATCCTTGCAGGCGTTTGCACAAGTCTTGCAGCTCTTTTTTCAGATCGATGAGCTCAGAGACGTCTTTGCAAACTGAAACGACTGAAGATAACGGATTTAAGGGGCACGATATGCTTGCTCCATTCACTGCTGGATGGCAGAGTAATGACCTGCACCCTCTTGTCATAGACAAGTCAGAGGGATCTTATGTTTATGACATCAAAGGGAAGAAATATCTCGATGCTCTTGCTGGATTATGGTGTACATCTTTAGGTGGAAATGAGCCTCGTCTTGTAGCTGCTGCAACTGAACAAATGAATAAATTGCCATTTTACCACTCCTTTTGGAATCGAACAACGAAACCTTCTTTGGACCTT…	1503	transamination	Veratrum californicum	KJ869265.1	AJT59571.1

## Sheet: Table S5
Table S5. Annotation of transcripts from organs libraries identified as CYP candidates.
No unique cluster	Unigenes ID	Nucleotide sequence	Unigene Length	FPKM	Blastx E-value	Blastx accession (E-value)	Function
1	stalk_contig_678	GCCGACAACTCCTATAACCATTTATTTCACATAACCCCATAAATTACGACCATATCCTCTTGACATGCAAGCACACAAACCCAAAACCAACCATGAAAGAAATCAGTCCCCGAGTTTTTCGAGGGGGCGAACTTTGATCGGTAAACGCTTGGGAAAGCCGAGGAACGGGAAGGACACAGGGTAATCGTGCTCCGCCAGCTCCCACCGGTACTTCTGGACGAGGTGGTGAAGGAATACGGCGATCTCCAGCTTCGCCAGCTCGGCGCCGGGGCAAAGCCGGGGCCCGCCGCTGAATGACATGATTGACATCACGTTGCTGTTCTTGGTATTTCCAGCCAAAATCGCCTGCCACCTCCACGGATCGTACCGCTGTGGGTCATCGTAGATCGAGGAGTCAAG…	1625	0	0	Vc: cyp90B27	C-22 hydroxylation
2	root_contig_641	AACAATCTCCTCATCTCAACTCACTCAAGAGACAGAGAGAGAGAGAGCTGGCTCCAGCCATGGCGATGGAGCTCCTCTTGCTGATCCCTGCGTTGATCGTCGCCATCATCATCTTCTTCAGCTTCAAGTCGACAAACGGGACGTCTACCAAACCGCTGAAACTCCCGCCGGGCCAAATGGGTTGGCCTTTCATCGGCTACACCATCCCCTTCATGCAGCCCCACTCCTCTGCGTCCCTCGGCCCCTACATCGACCTCAACACCGCTAGGTATGGGACCATCTTTCGGATGAACTTGTTGGCGAAACCGACGATTGTGTCGGCGGATCCGGAGTTCAACCGGTACATACTGCAGAACGAGGGCCGGCTTTTCGAGAACAGCTGCCCGACGAGCATCGCGG…	1615	0	0	Vc: cyp90B27	C-22 hydroxylation
3	6_stalk_contig_540	TGGTGGGGGTGACTGCTAGAGGGGGAGGGAGAGTGGTGGTGCTCCTGACGGCTGCGGGCTCAGCTCCATGAGATTCAAGCCATTCTTAGAGAGAGAGAGGAATGATTTGAGAGAGAGAGAGAGGGAGAGAGATGGCTCCTGTAGTTGTTCTCTTCTCTCTGTTGGCTACACTACTAGTGTTAGTAGGTTCAGCCTTTTGGCTGCGAGCAAGCAAGGATGAGAGCTGGAAGAATAGGGGGTTGAGGCTCCCACCGGGCACCATGGGTTGGCCTCTCATCGGTGAAACCCTGTCCTTCTTAAAGATCCACCCTAGTAATTCCCTCGGCGACTACCTCGAAGAGCGCATCAAGATGTACGGGAAGATTTTCAAGGCGAACTTGTTGGGGTCGCAGACGGTGG…	1786	4.55	0	Vc: CYP90G1v3	C-22 oxidation
4	6_root_contig_510	GGCTTCAAGCAGGCATGGGCATTCAAAGCATTCTCACAATGTATCTAACATGAGACATTATTGAGTTACAGGCTCTTGAATCCAAACATATAGAAAGCTACATACCACACACAGATCATCAAAACTCAAGGAGAGAGCATTGAGAGAGAGAGAACAACAAACATGAACTTTATTGAGCCTTTTGGAGGGTCCTATTGGAGGAGTGAAAGCCGGCGAACCTTGATGGGTAGGCCCTTGGGGAACTCGGGGAAAGGGGACGCTACGGGATTGTCGGGCTCTGCCAGCTCCCAGTCGAAGTTGAGCACGAGATGGTGAAGAAACACAACAATCTCCAACTTGGCGAGTTGTAGCCCCGCGCAATTGCGCAATCCCAAACCAAAAGGCATGTAGTTATCGTTC…	1786	18.94	0	Vc: CYP90G1v3	C-22 oxidation
5	leaf_contig_707	AAAAATTCAAAAATTTTCAAGATCTGTTTGTGTGAGAGAGAATGGAGTTCATCTCATTCCTCACCCATTCAATCCTCGTCCTCACAGTCCTCTTCGCCCTCTACGCCATCGTCGAGAGAAAATCCAACCCGTCGACCTCCAAGAAGAAGAATAAGGAGGACGGGAACCAGCTGCTTATGGACTGGACCGCTGGGCTGGTGCTGGCGAGCCCGACGAACACGGTGTCTCTCCCGTCCATGGTCATGACATCCAACCCGTTGAATTTGGAGCACGTGCTGAAAACCAACTTCGGAAACTACCCCAAGGGGGAATACTACCAGACGGCGCCGCTGGTTGAACTCCTCGGCCACGGGCTCTTCAATGTGGACGGCGAGAATTGGAAGTCTCAGCGAAGGACGG…	1645	13.66	5.05e-138	Vc: CYP94N1v2	C-26 hydroxylation
6	stalk_contig_3163	CCGGAATGGATCTACCCTCCGCCACCTCCGCCGCCGTCGCCGCCGCCGTAATCATCCTCCTCACTGTCTACCTCCTCCCGAAGAAAAAATCTCCGGCGTCGACCGGGAACAGCGGATCGACATCCCTGAAGAGCTACCCAATAATCGGCAACCTCCCCCACTTCGTCAAGAACCGCAACCGCTTCCTCGACTGGGTGGCGGAGATCATCGCCCTCAGCCCCACCGACACCGTCATCGCCGCCCCCCTGGTCTTCACCGCCAACCCCGACAACGTCGAGCACACCGCCAAGTCCCGCTTCGACACCTACTCCCGCGGCCCCGCCGCCACCGCCGTCCTCCACGACTTCCTCGGCAGCGGCATCCTCAACGTCGACGGCGACGGCTGGCGGGCCCAGCGGA…	707	0	3.55e-136	Vc: CYP94N1v2	C-26 hydroxylation
7	5_root_contig_682	TTATGTTTAAAAAAGTTGTTTGCAAGTTGTTGATATGAATATATGTCTGAATGACGTGTTTTGGGGATTAATTTCCTCAATTTGGATTGTACCTCTAATATATTCATCTAACTGCTGACTTTAGAATTGGTTGTGCTCGAAATGTTATGAATTGATTAACAAGCCCAATTATTCTCTAAGATAATTCGTTGCAGGGAGACTTCAATCATGATATCATGAAGGACTTGCTCGGCGACGGAATCTTCGCCGTCGACGGCGAGAAATGGCGACACCAGAGGAAGACCGCGAGCTACGAATTCACCGCTAAGGTCTTGCGTGATTACAGTGGTCAGGTCTTTAGGAGCAAAGTTACCGAACTCGCAGAAATCATTGCAAAGGCTTCACGAAACAACGAAATGA…	1573	8.1	3.02e-92	At: CYP86A2. unspecific monooxygenase	C-16 hydroxylation
8	5_stalk_contig_703	GAGGATTTGGTCGCTAGCGGTTCATCAATTTATTATGTTTAAAAAAGTTGTTTGCAAGTTGTTGATATGAATATATGTCTGAATGACGTGTTTTGGGGATTAATTTCCTCAATTTGGATTGTACCTCTAATATATTCATCTAACTGCTGACTTTAGAATTGGTTGTGCTCGAAATGTTATGAATTGATTAACAAGCCCAATTATTCTCTAAGATAATTCGTTGCAGGGAGACTTCAATCATGATATCATGAAGGACTTGCTCGGCGACGGAATCTTCGCCGTCGACGGCGAGAAATGGCGACACCAGAGGAAGACCGCGAGCTACGAATTCACCGCTAAGGTCTTGCGTGATTACAGTGGTCAGGTCTTTAGGAGCAAAGTTACCGAACTCGCAGAAAT…	1605	0	4.13e-92	At: CYP86A2. unspecific monooxygenase	C-16 hydroxylation
9	stalk_contig_5333	GGGCGGAGGAGGAGTTCCTGCAGGTCGACGTAGGACGCGGGGCGGCAGCTGGCGGCGAGGGGTCGGAGGGGGCGGGTCTTGATGGAGCGGTTGGCCCAGCGGGCCATCGCCTGGCGGAGGGTGCGGGTGGTGAACTCGAGCGCTGCGGTCTTGCGCTGGAGGAGCCAGGTGTCGCCGTCGGAGTTGAAGATGCCCTGGCCGAGGAGGTCGTGGAAGGCGGACTGCCACTGGGGGCCTTTCGGGTAGTTGTCGAAGCGGGTGCGGAGGACGTGCTCGAGGTTGCGGGGGTTGCAGGTGACGGTGACGAGCCCCTGGCGCCAGGCGAGGAAGGGGACCGGGAGGATGCAGGTCTGGTAGGTGGCGGCGTGGCCGGTGGCGCTGAGGTTGTCCGCGATCCAG…	507	0	1.7e-77	At: CYP86A2. unspecific monooxygenase	C-16 hydroxylation
10	root_contig_3955	GGGTGGACTCGGTGGCGCGGTCGAACGCCACGGCGAACGAATTGTCGGGGAGGTCCGGGGCGAGGGTCTCCGGGTCTTTACCGAAGGTGAGGCCGCAGATGTTGTCGAAGGTCAGGCGGAGGAGGAGGTCCTGGATGTCGACCGGCGAGGAGGCGGAGGAGAGGATGGGGAGGAGGCGGAGATGGATGGAGCGGTGGACCCACCGGGACATAGCGGTGCGGAGCGTGCGGGTGGTGAACTCGAGGGCGGCGGTCTTCCGCTGGAGGAGCCAGGACTCGCCGTCGGAATTGAAGATGCCGTCGCCGAGGAGGTCGAGGAAGACGGCGTGCCACGTGGGGCCCTTGGGGTAGTTGTCGAAGCGGGACTTGAGGACGTGCTCGAGATTGCGGGGGTCCGCGG…	547	0	1.47e-99	At: CYP86A2. unspecific monooxygenase	C-16 hydroxylation
11	leaf_contig_489	TGTGTCTTTGACCTTCTCTACAAGCAAGTAGTTCAACATTCATTGCTCCTCCTCCCATCTAAACCCATCACGAAGAACTACTCCATGGACATGGAGCTTCAATCCTTCACTCTTGCATCCGTAGTACCAGCTTCACTGCTGTTGCTGCTCGCCGTCGTCGTCGCTAGCCGGCTTTTCTCCAAGGGGCAAAAGCGGAATTATCCGCCAATCGCGGGAACCGTCTTCCACCAACTGAAGAACCTCCACCGGTTTGTCCAGTTTCAGACCGACCTCTCCCGCCGCTACAAGACCTTCAGGATGCTCACCCCCTCCCGCAACTACATCTACACCGTCGATCCCGCCAACGTCGAGTACATCCTACGGACCAACTTTGCAAACTACGGGAAGGGGGACTTCAAC…	1941	25.98	2.5e-98	At: CYP86A2. unspecific monooxygenase	C-16 hydroxylation
12	stalk_contig_554	CAAGCAAGTAGTTCAACATTCATTGCTCCTCCTCCCATCTAAACCCATCACGAAGAACTACTCCATGGACATGGAGCTTCAATCCTTCACTCTTGCATCCGTAGTACCAGCTTCACTGCTGTTGCTGCTCGCCGTCGTCGTCGCTAGCCGGCTTTTCTCCAAGGGGCAAAAGCGGAATTATCCGCCAATCGCGGGAACCGTCTTCCACCAACTGAAGAACCTCCACCGGTTTGTCCAGTTTCAGACCGACCTCTCCCGCCGCTACAAGACCTTCAGGATGCTCACCCCCTCCCGCAACTACATCTACACCGTCGATCCCGCCAACGTCGAGTACATCCTACGGACCAACTTTGCAAACTACGGGAAGGGGGACTTCAATCATGATATCATGAAGGACTT…	1768	0	2.71e-98	At: CYP86A2. unspecific monooxygenase	C-16 hydroxylation
13	leaf_contig_433	TGTGTCTTTGACCTTCTCTACAAGCAAGTAGTTCAACATTCATTGCTCCTCCTCCCATCTAAACCCATCACGAAGAACTACTCCATGGACATGGAGCTTCAATCCTTCACTCTTGCATCCGTAGTACCAGCTTCACTGCTGTTGCTGCTCGCCGTCGTCGTCGCTAGCCGGCTTTTCTCCAAGGGGCAAAAGCGGAATTATCCGCCAATCGCGGGAACCGTCTTCCACCAACTGAAGAACCTCCACCGGTTTGTCCAGTTTCAGACCGACCTCTCCCGCCGCTACAAGACCTTCAGGATGCTCACCCCCTCCCGCAACTACATCTACACCGTCGATCCCGCCAACGTCGAGTACATCCTACGGACCAACTTTGCAAACTACGGGAAGGGGGACTTCAAC…	2035	25.98	2.22e-81	At: CYP86A2. unspecific monooxygenase	C-16 hydroxylation
14	leaf_contig_564	GAACTGTATTGATTGCTCCGTTGCCCACATTTGTCCGATTTGAAGGAAGATCAGGCGAACGAAGCCCGAGACTCCGACTCGACTCGACGGTGGTGGTGGTGGTTCAATGGTTTCGTGGAGCCCGAGCTGGGTGGCGGCAGTGGCCCTCGCGGCGGTCGCGGTGGCGGTTTGGAGGGCGGCGGAGTTGCTGTGGTGGAAGCCACGGCGGCTGGAGCGGGCTCTCCGGGCTCAGGGCCTCCGCGGTACGCCCTACCGCTTCCTCAATGGGGACCTCAAACTGACCGCTCGGCTCACCAAAGAGGCACGAGCGGAGCCCATCGATCCGCCGTCGCACCGCATCCTTCCTCGTGTCCTCCCCCTCATCTATCACTCCATCGAACAGCACGGTAAAATTTCATT…	1803	6.13	0	Sl: CYP72A186. GAME7	C-22 hydroxylation
15	leaf_contig_608	TAAAAGGAGAGAAAGCGCGATTGGTAAGTAAGGGATCGATATGGGTTTGTGGTTCGAAGTATCAGCGGCGGCGGCGGTGGGGTTGTTGGCCGTATGGGTTTGGAGGGTGGCGGAGGCGATGTGGTGGCGGCCGCGGCGGCTGGAGCGAGCATTGAGGGCGGAGGGGCTGAGTGGGACCCCATACCGACTGTTCTACGGGGACCTCAGAGAGGAGGCACGGCTAAGGACGGAGGCGTGGTCGCATCCAATCACCACCGATGATCACTCCTCTTACCACCGCATCGCCCCTCGCGTTGCTCCCTTCCTCCATCGCGCCATGGAGCAGCACGGTAAAATATCATTCACTTGGTTCGGGCCTCATCCGAGAGTGACGATCATGGACCCCGAGCTGATAAGGGA…	1756	18.45	1.4e-170	Sl: CYP72A186. GAME7	C-22 hydroxylation
16	leaf_contig_458	TCTCTCTCTCTCTCTCTCTCTTTGAAGATGATAGCAGCAGATGTACCAGTAAATTGTGACTTTAATCTTTAGTTTTCGAGCCAACTGCCGAATATTACAACAAACAATTGATCAGATTCGAGCAGGAGAAACTTCACTTTGTTGCCCACTCTCAGTAACGTTGCTTCTGACAGTTGAAGCTTCAGACTGGCACAGGCTTTCTGGTTGATCACCGTCAACAATCAATACATTCTTCATCTCTAGTGACGGAATCACAGGAGGCTTAGTTCTACGAGTGACTGTCATCACTAAACCCTCCGTAGTGTGAATGGTTGCTCCCGTAGTCATCTCCACCTCAAATGAAGCAAACATATCCCCGACACACTTCCGTGGGCCACCACCAAATGGTAAATAACTGAA…	1998	5.46	3.19e-145	Mt: CYP97B43	b-hydroxylation
17	root_contig_1023	TTCTAATTCAATATTACAGATACAAAACCACTTCTCTATATATATAGTATATATATCAAGAGACAAGAACTAGCTCAAGATGGTAGATGACATTGTTTACCTTTTATCCCTTTACAAGAACAAGACTAGAGTTTATTCAAGATTATCTGAGCACCATATTGTGGCTGAATGGTTAGAACAGTGTGGGGGGCGTGAGTGTAGGATGGTGATGGCTCGAAAGAGAAATGCTGGAGGATCGTCGCGAGCCCGAGCTTGGCTTCCATCATGGCGAAGCTCTGACCGATGCAGATTCGCGGGCCCCACCCAAAGGCGAAGAAGGCGCCTTGGCTCTTCGATGCCTTCGAGACCCCCTCTGAGAACCTCTCGGGCTTGAACTCGCTGGCGTCCTCGCCCCAGAAT…	1280	25.62	6.04e-144	Sl: CYP72A186. GAME7	C-22 hydroxylation
18	leaf_contig_2741	TTCTCGAGGACTTCCTCGGTCGCGGAATATTCAATGCCGACGGGAAGCTCTGGCAGGCCCAGCGCAAGCCCGCCGCCCTCGCATTCGCCTCCCGCTCCCTCCGCGACTACGCCCTCAAAACCGTTCGCGCCGAGATCAATTCCCGCCTTTTGCCGCTCCTCAAAAATGCCGCCGCTGTCGGAGTCGTCGTCGACTTGCAGGACGTGCTCGAACGGTTCGCGTTCGACAACGTGTGCAAAGTCGCGTTCGGCGTCGACCCCGCCTGCCTCAGTTCCGGCGAAGAGGAGGTGGGGGCTCCTCCTCTGCTCTTCTCTGGCTTCGCGGAATCCTTCCGCGACGCCGCCAACCTTAGCGCCGGGAGGTTCCGGTATGCCGTCCCGCGTCTATGGAAGGCGAAGC…	879	7.28	9.74e-95	Vc: CYP94N1v2	C-26 hydroxylation
19	root_contig_4383	GGAACGGATGAGACCGGTGAAAAAGACCTGTTAGGGTTTGTCCTCGAGCAGTCGAACCTCGACACCGAGCAGTTCGGCGATCTCCTGTTGGGTTTGTTGTTTGGTGGCCATGAGACCTCAGCTACGGCAATCACTTTGGTCATTTATTTCCTTCACGACTGTCCTAAAGCCGTTCAACAACTTCGGGAAGAACACATGGAAATCGTTAGGATGAAGAAGCAAAGAGGAGAGTGTGCTGGACTAACATGGGATGACTATAAAAGGATGGAGTTCAGCCAATGTGTGGTGAGTGAGACCCTTCGGTTGGGCAACATTATCAAGTTCGTTCATCGCAAGGCGATTACTGACATCCATTTCAAAGGGTATGATATCCCGAGCGGGTGGAGTGTGATCCCGGTC…	511	0	6.78e-90	Vc: CYP90G1v3	C-22 oxidation
20	1_stalk_contig_4229	TTGAGAGAGATGGTTGGGCTCATGGTGGAGTCCTCCTCCAAGCCAATGTTGCCTCAGAACTCACACAACATCCTCCCAAGGGTCCTCTCCTTCTACCACCATTGGAAGAAGATCTATGGCTCGACGTTTCTCCTCTGGTTCGGGCCCACCGCCCGGCTTGCCGTAGCCGACCCCGACCTTATCCGTGAGATCTTCGTGTCTCGATCCGACGCTTTCGACCGCTACGAGTCCCACCCGCTGGTCCGGCAGCTCGAGGGCGAGGGCCTCGTCAGCCTCCGCGGCGAGAAATGGGCCCACCACCGGAAGCTCCTATCCCCCACCTTCCACATGGACAACCTCAAACTGCTGATACCGCACATCGGGAGGACGGTGATAGAGATGGCGGGGAAGTGGGCGGCG…	587	0	3.58e-86	At: CYP734A1. BAS1	C-26 hydroxylation
21	leaf_contig_4222	GATCTCTTTGGGTTGCCAAGTGATTTCTTTGAATAATTCATCGAAATCATTGAATTCCAGATGCCTACATCATCTCCATCTCATTTGGCAGGGCCCTGACCCTAATTTGTAGTCCTTTAGGGAACTTGATGACCGGTATGCTCACAGGATGGTCAGGCTCTACGGACTCCCACTCATAGTTCAGTATGAGATGGTGAAGAAATACAGTCATCTCCAACTTGGCGAGCTCAGATCCCGGGCAAATCCGGGCTCCTCCACTGAACGGTGTGAAGTTGTCGCTCTTCTTTATCCCAGATGAGCACATCCATCTCCATGGATTGAAATGCTGGGGGTCCTCAAACAAGAAGGGGTCCATATGTACCGCCCTGAAGTGGGGAATGACAATGCATCCTCGAGGAA…	679	0	4.85e-78	Os: CYP90B2	C-22 hydroxylation
22	stalk_contig_4816	GCCACCGGTGGTGGAAGCGACATCCTTTCCCACTTCATCGCGGCGGAGGACGGAGACCACTCCGACGAGTTCCTCCGCGACGTCATCATCAGCTTCGTCCTCGCCGGCAGGGACACCACCTCCACCACGATGACGTGGTTCCTCTGGAACCTCGCATCCCACCCGTCCGTCAAGGAGAAAATCCGGGACGAGATTAGAGGCGTAAGATTGAAGCACGGGAATCCGAACGGTCCGTTTTCGCTGGACGAGATCCGGGACATGGTTTACCTCCATGCGGCGGTGACGGAGACGCTGCGGCTGTACCCGATCGTGCCGCTGCATATGCGCACGTGCGCTTCGGACGACGTGCTTCCCGACGGCACGACGGTTAAGGCGGGGTGGGCGATGGCGCACAACGTG…	541	0	6.51e-66	Vc: CYP94N1v2	C-26 hydroxylation
23	leaf_contig_1655	AAGGGAGTTTTTTTTGGCCCTCTGCTGATTTTTTTAGTGATCGCATATATGGGCTCTCTGAATTCCATAAATTGGGATTTATATTTAATGTTGCAGGTGAAGAAAGAGGACATACTTTCAAGATTTCTTATGGAAAGGGAGAAAGACCCCGAAAACATGAGCCTAAAGTACTTAAGGGACATAATCCTAAACTTTCTGATAGCAGGGAGGGACACAACAGCAGGCACCCTCTCATGGTTCTTCTACATGATGTGCAAGCATCCTCATATACAAGAAAAAACCGTGAAAGAGGTAAGAGAAGCTACGGGAACTGGAACGATGACCGGTGATTTCACGGCCTCGAGCTTAACCGAGGACGCGCTGAACGAGATGCAGTACCTCCACGCAGTGCTCACCGAG…	1146	25.98	2.38e-59	Vc: CYP94N1v2	C-26 hydroxylation
24	stalk_contig_9430	GGAGCGCGCGGACTGGCTGGAGGAGCCGCTGGGGTTCGAGGAGCTGGAGCGGCTGGTGTACCTGAAGGCGGCGCTGGCGGAGACGCTGAGGCTGTACCCGTCGGTGCCGGAGGACTCGAAGTACGTGGTGGCGGACGACGTGCTGCCGGACGGGACGGCGGTCCCGGCGGGGTCGGCGATCACGTACTCGATCTACTCGGTGGGGAGGATGGAGGAGATCTGGGGCGCGGACTGCCTGGAGTTCAGGCCGGAGAGGTGGCTGGCGGAGGACGGGGGGCGGTTCGAGCCGGGGCACGACGTGTACCGGTTCGTGGCGTTCAACGCCGGGCCGAGGACGTTCTTGGGGAAGGATCTGTCGTACTTTC	365	0	5.37e-59	At: CYP86A2. unspecific monooxygenase	C-16 hydroxylation
25	3_leaf_contig_20959	CACAAATGAAAAAGAAAATGAGTTGGATCTAGAAGCAGAATTTTCAAATCTAGCCCTTGACATTATTGGGCTGGGTGTGTTCAATTATGACTTTGGATCTGTCACAAAAGAATCACCTGTGATTAAGGCAGTTTATGGGACTCTTTTTGAAGCTGAACATAGGTCAACTTTTTATATTCCCTATTGGAACCTCCCTTTTACAAGATGGATAGTTCCAAGGCAGCGTAAGTTCCGCAATGATCTCAAGGTTATCAATGATTGCCTTGATGAACTCATAAAAAATGCCAAGGAAACACGCCAGG	302	0	5.23e-58	Mt: CYP97B52	b-hydroxylation
26	leaf_contig_22787	GTTTATAAACTTGCATTTGGACCAAAATCATTTGTTGTTGTATCTGATCCTGTGGTTGCGAGACATATCCTTCGAGAAAATACATTTTCTTATGACAAGGGAGTTCTTGCCGATATCCTGGAACCAATAATGGGAAAAGGGCTTATACCTGCAGATCTTGAAACTTGGAAGCAAAGGAGGAGAGTTATTGCACCTGGTTTTCATTCTTTGTTCTTGGAAGCAATGGTCAAGGTATTCTCCTCTTGTTCTGAAAGAACGGTTTCAAAGTTTGAGAGGCTTATTGAAAAAGAAAA	293	0	6.39e-58	Mt: CYP97B51	b-hydroxylation
27	stalk_contig_6773	TGATCCATGGAGATGGCAGACTGGTTCTACGAGCAAAGCTTTGAACGACAACTACATGCCTTTTGGTTTGGGCCACCGCAATTGCGCTGGCCTACAACTCGCCAAGTTGGAGATTGTTGTGTTTCTTCACCATCTCGTGCTCAACTTCGACTGGGAGCTGGCAGAGCCCGACCATCCCGTAGCGTCCCCGTTCCCCGAGTTCCCCAAGGGCCTACCCATCAAGGTTCGCCGCCTTTCGCTCCTCCAATAGAACGTAACCCTCCAAATTGCCCAATAAATTAAGTCCATGTTTTTAAGTCTCTATGTGTGTGTGTGTACATGTATGTAGCTTCTATATGTATCAATGTATGGATTCAAGTATAGTCTGCAACTCAATAATGTCACATGTGAGATAGATTG…	440	0	4.13e-54	Vc: CYP90G1v3	C-22 oxidation
28	3_stalk_contig_4266	CATAAAAAATGCCAAGGAAACACGCCAGGAAACTGATGTTGAGAAACTTCAACAAAGAGATTACTCAAGCTTGGAGGATGCAAGCCTACTGCGGTTTCTTGTTGATATGAGGGGAGTTGATGTTGATGACCGTCAGCTTAGGGATGATCTCATGACCATGCTTATCGCTGGACATGAAACAACTGCCTTTTTATATTCCCTATTGGAACCTCCCTTTTACAAGATGGATAGTTCCAAGGCAGCGTAAGTTCCGCAATGATCTCAAGGTTATCAATGATTGCCTTGATGAACTCATAAAAAATGCCAAGGAAACACGCCAGGAAACTGATGTTGAGAAACTTCAACAAAGAGATTACTCAAGCTTGGAGGATGCAAGCCTACTGCGGTTTCTTGTTGATA…	584	0	2.93e-46	Mt: CYP97B33	b-hydroxylation
29	1_leaf_contig_10594	GGTCGCGGGTGGGGACGTCACGTGAGCCGCAGACCCGGAGGACCTCGTCACGTGCCCGATCCTGCCAGTCCGGGTGCATGGCCAGCAGCACCGTGGTCCACGTCAGCAGGTTGGAGGTGGTCTGCTTGCCGGCGAAGAAGAAGGTCTTGCACTCCTCCACGATGTCGTGCACGGTGATCGGCGGCGGCGGCGGCGTCATTCTGATCCTTGCCGGCGGCGTTTATCATGAGGCCGAGGAGGTCCTTGGTCGGCGCCGCCTCGTCGGGGATCTCCCTTCGGGCGGCGATGAGGCGGACGAGGTTCCGGTTGATGGCCTTGTCGAGCCTCCAGCAGCTCGTGTTCCGCTTAGTGGGGAAAAAGCGGTACCCGGGGATGAAGACCTTGCGGAAGGCCTCGCCG…	414	0	7.77e-45	At: CYP734A1. BAS1	C-26 hydroxylation
30	root_contig_19134	CTGATATCTTTATTTCGGTATACAACCTTCACCGATCACCGTATTGTTGGGACCGACCTCATGAATTCGAGCCGGAGAGGTTTCTAGTTCCGAAAGAGAGCGGAGGCATTGATGGATGGTCGGGCTTCGATCCAAGCCGAAGCCCCGGTGCAATGTATCCGAATGAGATAATTGCAGATTTCGCCTTCCTTCCTTTTGGCGGTGGGGCCCGAAAGTGCGTTGGG	224	0	1.07e-44	Mt: CYP97B8	b-hydroxylation
31	stalk_contig_2294	GTCTTCCATGCTATCATCTTGGGTTTGGACTTCTCTTATGTCCCCTCTCCTCTTTGATACAACCTCGGTTACAAAACCGTCGACCACTTTTCGCGCTAAGGCTAATTTTTTCTCCTCACCTATTCTCATCCATCTCAAACACTTCCACCAAACATTCGGTACCGTGTACCGGAAAAACACAGCGGTCATCGCGTCGTCCATTGCCTTCGCGAAGGGAATGCTCCCGGGCTTAGCTGAGAGGCAACCCGGGTCGACCCCGAAAACCAAATTACATGTTAGATCGAAGGTTAGGCTAAGTAGCACACATTGCAAATCGACCACCTCTTTTCGGTCGGCGATTTGGGCTAAAAGAGGGATGAGGCCCTTCGAAACCTTGTAGCGGCTAGAGTCGGCCACGAT…	861	17.93	1.13e-44	At: CYP86A2. unspecific monooxygenase	C-16 hydroxylation
32	root_contig_1159	GTTACCAACTATGAAACCAAGCCGGTCCAGAAACGTCAAGGCCCTCTGAGCTCTCTCTCCCTCTCTCTCTCCGGCGTGCGGGTAGCAAAGGAAGCGTCTTGTTTAAGAAAGGGTGCTTGCAGAGCATGTAGAAAAACCAGGACAGCGTGTTCGCCGAAGTGTCTTTCCCCGCTATCAAGAAGTTGAGGATTATGTCCCTCAGGTACCGATTATTCATAAGCTCCGGGTCTTCCTCGCTCGCTACTATGAACCGTGACAGTATATCATCTTTGCCATCTTCAGTCCCTCCCTTCATCTGTTTCCTCTTGCGTTCGATCAGTTGGAAAACGAAGTCATCGATGACTTTGATGTTCCTCTTGAGCTGGGCCTCCTGCCCGATGTTGAACCGCCGCTTGWGTT…	1192	32.59	4.57e-44	Vc: CYP94N1v2	C-26 hydroxylation
33	leaf_contig_1507	GTTACCAACTATGAAACCAAGCCGGTCCAGAAACGTCAAGGCCCTCTGAGCTCTCTCTCCCTCTCTCTCTCCGGCGTGCGGGTAGCAAAGGAAGCGTCTTGTTTAAGAAAGGGTGCTTGCAGAGCATGTAGAAAAACCAGGACAGCGTGTTCGCCGAAGTGTCTTTCCCCGCTATCAAGAAGTTGAGGATTATGTCCCTCAGGTACCGATTATTCATAAGCTCCGGGTCTTCCTCGCTCGCTACTATGAACCGTGACAGTATATCATCTTTGCCATCTTCAGTCCCTCCCTTCATCTGTTTCCTCTTGCGTTCGATCAGTTGGAAAACGAAGTCATCGATGACTTTGATGTTCCTCTTGAGCTGGGCCTCCTGCCCGATGTTGAACCGCCGCTTGTGTT…	1192	9.78	8.3e-44	Vc: CYP94N1v2	C-26 hydroxylation
34	leaf_contig_11823	GAATTTAAGTGTGCATAAACTCCCGCGGCCAGGGGGGAAACACCGGATACCGGAACGGGCTGTCCGGCCTAAACGCCCCATTCTCCTCCAACCACCGCTCCGGCTTATACTCACCGCACCCCTCCCCCCAAATCTCCTCCATCCTCCCCATTGCATACGCGCTATAGCTCACCAACCATCCTTTTCCGACCCGGGTTCCGTCGGGCAGCACGTCGTCGGCCTCGCACGATGTCGAGTCGATCGGCACCGGTGGGTACAGCCTCATCGACTCCGAGATCGCCGCATGGAGGTAATTCATCTCCCTCAGCTCGTCGAAGCTGAACTCATCGCTATCGTAATTACGCAATCTGCGGATCGAGTCGATTTCCGCGCTTATTCTCTCCTCGACGTCGG	393	0	1.84e-43	Vc: CYP94N1v2	C-26 hydroxylation
35	root_contig_8686	GGGGACTCGGCATTGCCTGAGGAAAAAAAAACTCATATCCTCCTCAGCAGAATATGGGCACCATATTGAGGCTGGAGGGTGAGCAGCACCATGGGGGCATGAACATAACACGGTGAAATCGAGAGCTCAAACCGCTGGATTATCATGGCGAGCGCAACCTTTGCCTCGACGAGTGCCAGGTTCTGGCCGACGCACACATTAGGACCCGCCCCAAAGGGAAGGTAGGACCCAGGACGATGACCGGCGGGGTCCGTGAACCTCGAGGGGTCGAATCCTTCGGCGTTGGGGCCCCACAATCCGGCATCGTGATGGACGGCGATCATGGGCA	328	0	5.83e-43	Os: CYP734A1	C-26 hydroxylation
36	root_contig_6187	TGCATTACCTCCACGCGGCGATATTAGAGTCGATGAGGCTCTACCCGCCGGTGCCCATCAACTCGGTGTCGTGCCACGAGGAAGACGTGTTGCCGGACGGGACCTCGGTGGGGAAAGGATGGTTCGTGGGGTACAGTGGATACGCCATGGGGAGGATGGAGGAGATATGGGGGAAAGATTGCAAGGATTACAAGCCGGAGCGGTGGTTGACGGAGGACGGGGTTTTCCAGCACGAGAGCCCGTCCCGTTATCCGATTGTCCACGCGGTGCCGAGGGGGTGGTTACGAACGGAGATGGCATATATACTGATGAAGTCGCTCGACCCGAGCGACATCGCACAGTTCGAGGTTGATACGGGCGGACAGGGACACACCCCACCGCCCCGCACAGACGCCATTT…	403	0	7.25e-42	Vc: CYP94N1v2	C-26 hydroxylation
37	root_contig_8070	GGACACAACTGCGAACTTCTTGACATGGGCAATCCTTCTCCTGGCTATGCATCAAGAATGGCAGAGTAAGGTGCGAGACGAAGTAACATCTGTTTGCGGTAATCATGAGCCTCCTACTGCAGAGGATTTGAGCAAATTTAAAATAGTAAGCATGGTGCTTAAAGAAACCCTCCGGCTGTACCCTCCTGCGGTGGCTTTTAACAGGGTGGCTTCGAGGGACGTCATGCTCGGAGCTCTCCAAGTCCTTTCCGGGACCCAACTCTACATGCCCATGATCGCCGTCCATCACGTTGCAGGATTGTGGGGCCCAAACGCTGAAGGATTCAACCCCTCGAGGTTACC	342	0	7.04e-41	Os: CYP734A1	C-26 hydroxylation
38	root_contig_12676	ATCTTTTCCTACAGGACGTTTTTGCGATCTGGACTGGTAGCACCTTCCAACCAGAAGGGATCAGATATTCTTTGAATCTCACATCCTTGAGAGCCTTTCTATGAACAAATTTGACAATGTTTCCACACCTCAAGGCCTCATTGATCACGCATTGAGTGAATTCCATCCTTTTGTAATCTTCTAAGCTCAAGCCCTCATCATTCTGCTTATAGTCCCTTATAGCTTGATGCTCTAACTTGAGTTGATGTAGAGCAGGTGGAGAGAGGCCAAGGAA	274	0	6.4e-38	Os: CYP724B	C-22 hydroxylation
39	root_contig_9061	CTCGTCGACGATGGGCCCAAGGTCCCTCCGGCCCACGTCCATCAGCAGCCCGTGCTTCATGAACAGCGTCAGCGACATCTTCTGCTCGACGCGGTGCCCGGCGGCCACCGCCAGCCGGTGCCGGAGCAGCACGGCGGCGGCCACCGACTTCATCTGCAGGTACGCGAGGTCCTTCCCGAGGCACACCCTCGGCCCGGCGTTGAACGCCACGAACCGGAACTGGTCCTTCGCCTCGAACCGGCTCCGGTCCGGCGACATCCACCGGTCCGGCCGGAACTCGGCGGCGTCGGGGCCCCACACCGCCTCCGACCGCCCCGTGG	320	0	1.62e-36	At: CYP86A2. unspecific monooxygenase	C-16 hydroxylation
40	leaf_contig_46058	GGGCATCGAAGTTCATGAAATGGGCTCAAGTTGGAGAGGCAGGCCTTGTTGGAACTCCACATATGGGTAGGCCATGGGGGTGTCTTCACCTTCTAGTCTCCATCTGAATTTGTGAACAAGATGGTGGAGGAAGAATGCAGTCTCTACTTTGGCAAGCTCAGATCCAGGGCAAAGCCTTGGCCCACCACCAAAAGGAGTAAACTTCTTGCATGATGTAGGA	220	0	3.56e-36	Os: CYP724B	C-22 hydroxylation
41	leaf_contig_11185	GTTCACGGACGTAATTCCGTTCGCATGGCGGGTGAAGAAGTGGCTCGACGTCGGCTCGGAGAGGAGGCTCCGGCGATCGATTTCGGTTGTCCGTGCCTTCGCCGCGAAGATCATTCGGTCGAGAAGGGAGAGACCTATGAACGGCGCCGGAGACCTCCTATCGAGGTTCTCGTCGAGCGACGAGAACGCGGAAGAAGAAGTCCTTCGGGACAATATCATCAATTTCATCCTCGCCGGCCGAGAGACCACGTCGTCCGCGCTCACCTGGTTCTTCTGGCTCCTCTCTACGAGACCGGAGGTCGAAGAGAGGATACTCGCGGAGGTCCGATCGATCCGCGAGGCCAATTACAATCACGAATTCGGGTTCGACGAGCTGAGAGAGATGCATTACCTCCACGC…	404	0	7.19e-36	Vc: CYP94N1v2	C-26 hydroxylation
42	stalk_contig_6436	GGGTGATTAGCTTGCGGAAGGAGCGGTTGTTGAATTCGAGGGCGGCGGCGTTGCGGTGGCGTTGCCAGGTCTCTCCGTCGGAGTTGAAGATGCCGTGGCCGAGGAGGTCTTCGAGGATTGCGGCCGAGCGGTCGCCGATCAGGTAATTGTCGAATTTGGTCCGCACCATGTGCTCCACGTTGTGAGGGTTGGCCGTGACGATCATGGGGGGCTGCCCGGGGGTCAGGAGGGTCACGGTGTGGGTCGGATGCTGCGAGAGGATCTCAGTCATCCATTCGAGGAACCGGTGTCGGTTCTTGAGGAACTGCGGGAGGGTCCCGAGCAGCGGGTAGGGTTTAAGGACTGGTGGTGACCCGGATTGAGGTTTTTCGCGGAAGAATATGAAGGTGATGATTAGGA…	453	0	9.99e-36	Vc: CYP94N1v2	C-26 hydroxylation
43	stalk_contig_11546	GAAGAACTCTAGGCCCGGATGGGCGTCAAGTAGACGGGGACTCCGTGCTTGGGCCTCAGAGTTAGGACGTTAACGGGGGCGTGCCTGTAATTCTTCGAGATGGCGAAGGAGAAACTCGAGAGCAGCATCGCGAGGACGACCTTGGCCTCCATCATGGCGTAGGCCTGCCCGACGCAGTTGCGGGGCCCGGCCGCGAATGGGAGGAAGTGCCGGGTGAGCGCGAAAGACCTCGTCGCGAACCTCTCCGGGTTGAACTCGTTGGCGTCCTTCCCCCATATCGCCTCGTCGTGATGGATGGCGAGCACCAGGATCCATACCAAAAACCCCTT	329	0	3.17e-34	Sl: CYP72A186. GAME7	C-22 hydroxylation
44	stalk_contig_14038	GAATGCTGGAGGGCAGACCATCACCCCCCAACCTGATGGAATTGTATATCCATTAACTTTGATATCTTTCATTGCTTTCCTGAATATCGCTGGCACGATGTTGGCTAACCGGACTGTTTCATTGATAACTTGAAATGTGAAAGTCATAGATTTATATTCACTCCACGTGATTCCCGAATCTGGATTCTCTCGATTTCTGATAATCTCTTCATGCTCCGCCGTTAGCTCCTCCAACGCTCTAGGGTTCTCCGTAAGGAATTTAATTGCGGCGGTAAGAGCCAACGATGTGGTCTCGAAGCT	300	0	3.63e-34	Ml: CYP87D16	C-16 hydroxylation
45	leaf_contig_1141	GTATAACAAAGAGCTAGAGATGGGGTTAGCGTTGGTGGCCTTGGCCATGATAACACTTAGCACAGCCCTTTGGTGGGTGGTGGAGCACCTCATCTTGAGGCCGTACATCATCGCCAAAGGGCTGAGGGCGCAGGGATTGGACGGTCCTGATTACAAGCTGTGGTCAGGGAACCTTAATGAGATCAGGAGTTTGAAGAAGGAAGCTAGAGAGAGAATCATGGAGATAAACTCTCATGACTTCACGCCCAGAATCCAGCCGCAATACCACAAATGGTTATCTCACTATGGAGGCACTTTCTTATATTGGTTTGGCCCCCAACCGAGGATTTTCATTAGTGACCCTGAGATGGTTAAGCAAGTACTCTCAAACAAATTTGGGTTCTACACGAAAAATAAGGT…	1357	36.21	3.19e-32	St: CYP72A188. PGA2	C-22 hydroxylation
46	leaf_contig_6888	TGCGCCACAGAGCTCACCCTGTTGCGGTTCATCATGCCCCCCTTCGTGTGGAAGCCGATGCGGATCCTCGGCGTCGGGTCGGAGAAACGGCTCAAGGCGGCCATTCAGACCGTGCACGAGTTCGCCGACAGGACGGTTTCCGACCGTCGCGCTGAGATCGGGGACCTACCGGTCCCGACCCGGCGGTGCGACTTGCTTTCCCGGCTCATGAGCGCAACCGAGACTTCCAACAAGTTCCTGAAGGACTTCTGCATCAGCTTCATCCTCGCCGGGAGGGATACGAGCTCGGTTGCGCTCACGTGGTTCTTCTGGCTGCTGCACGTGCACCCGAGGGTGGAGGACCGGATCGTGGAGGAGATATCCGCGATCGTCGGCTCGCGCGTCCCTGATACGGTGACA…	516	0	4.82e-31	At: CYP86A2. unspecific monooxygenase	C-16 hydroxylation
47	leaf_contig_2879	GGTTACCAAACAACCCCTAAGTAATCGTAAAACTCCAACATACTCAACTACTCAACCTTTACCTCGCAGACTTTGTTGTTGGCCGGAACGGACACTTCAGCCGTCACAATCGAATGGGCGATGTCACTCCTCCTCAACAATCCCGACTCATTGAAGAAAGCGCAGGCCGAGATCGACGCCAATGTCAGAAACAACCGCCTCCTACAAGAGTCGGATCTCTCGAACCTCCCCTACCTCAACTCCATCATCACCGAGACACTCCGGCTCTACCCTGTTGGCCCACTCCTAGTTCCCCACGAGTCATCCGAGGACTGCATCGTATCCGGCTACCACGTCTCGCACGGCACGATACTTTTGGTCAACGTGTACGACATCCACAGGGACCCCAATCTGTGGGTG…	854	35.95	8.3e-31	Mt: CYP97B48	b-hydroxylation
48	stalk_contig_16837	CGTTTCGACGTGTATGTTCCACTCTGGGGCGCCGGACTTTAGAAACGGCGTTTCGGACGCCGTTACCGTTCCGTTAAAGTGGGCGGAGGCAGCGGCCGGAAAATGACGGGCGCGCCGTGCTGCGGGTAGAGTAGCATCAGGACCGTCGGCGCGTGAACGTACGACGGCGATGGGCGGAACGAGAAGCGCTGGAGGAGGATGGCGACGGTGAGCTTGGCCTCGAGGAGGGCCAGGTTCTGGCCGATGCACATCCGGGCGCCGAGCCCGAAGGGGATGAAGGCGG	283	0	1.3e-30	At: CYP734A1. BAS1	C-26 hydroxylation
49	root_contig_9899	GCAGAAATTAACCAGTAAATCACTAGCTCTTGGGTTCGATCCAAACAGGAAGCCCTTGGGAAGGAAAAGGCACAGGATCCCTTCGAAAGGAGTCGTCTTTGGAGGACAAGTTCCAGCGGAATTGTGTGACCAAGTGGTGCATCGCGACGAGCACTTCGATCCTCGAGAACTCATTCCCCGGGCAAATTCGTGGGCCCGCCCCGAACGCCATGAAGGAAAATGGCGGGTGCGGCGTTTGGCTGTCGAACCGTTTCGGATCGAACCTCGACGGGTCAGGGAAAATATCCGCATCCATGTGTGTAAT	304	0	2.51e-30	Ac: CYP716A111	C-16 hydroxylation
50	leaf_contig_14936	TTTGTTGTTTGTTTTGTTGTTGGTCTTGTTGTTTGATTTTTGTTTTTTTTTTTGTAGAAGAGGATGGGTTATGAGTTGTGAGGACGGGACTGGAGTTTAGACGTGGCCTTCCGATCTGTCAACTTAAAATTGTTACCATGATTTTGTACGAGGTATTAAGGTTATACCCACCTGCAATTTACTTCTACCGAGATCTTCAAAAGGATTTGAAACTTGGAAACCTTTCGCTACCTGGAGGAACACAAATTTCCCTACCAATACTTTTGATTCACCAAGATCATGATATATGGGGTGATGATGCAAAGGAGTTCAAACCTGAAAGGTTTGCTGAAGGATTTGCAAAAGCAACAAA	352	0	5.5e-30	Sl: CYP72A186. GAME7	C-22 hydroxylation
51	leaf_contig_811	CGATCATCGGCCACCTCCACCTCTTAAAGAAGCCCCTCCACCACGCCCTCGCCCGAATCTCCGCCCGATACGGCCCCGTCCTCCTCCTCAAATTCGGCGCCCGCCCCGTCCTCGTCGTTAATTCCGCCGCCGTCGCCGAGGAGTGCTTTACGAAGAACGACGTGGCCTTCGCCAACCGCCCCCAACTACCGACCCGTGGGCACATCACTTACAACTACAACACCCTCGGGGCCGCCAACTACGGTCCCCACTGGCGCAACATCCGCCGCATCTCCACCATCGAGCTCCTCTCCTCCCACCGCCTCAACTCCTTCACCGATCTTCGGGCCCGCGAGGTGGGCCTCATGGTCGGTCGCCTCTTTCGAGAGTCCGCGGCGGGCCCCGCAGAGGTGGAGCTGA…	1567	35.95	8.36e-30	Mt: CYP97B37	b-hydroxylation
52	2_leaf_contig_1875	TGTGTCTTTGACCTTCTCTACAAGCAAGTAGTTCAACATTCATTGCTCCTCCTCCCATCTAAACCCATCACGAAGAACTACTCCATGGACATGGAGCTTCAATCCTTCACTCTTGCATCCGTAGTACCAGCTTCACTGCTGTTGCTGCTCGCCGTCGTCGTCGCTAGCCGGCTTTTCTCCAAGGGGCAAAAGCGGAATTATCCGCCAATCGCGGGAACCGTCTTCCACCAACTGAAGAACCTCCACCGGTTTGTCCAGTTTCAGACCGACCTCTCCCGCCGCTACAAGACCTTCAGGATGCTCACCCCCTCCCGCAACTACATCTACACCGTCGATCCCGCCAACGTCGAGTACATCCTACGGACCAACTTTGCAAACTACGGGAAGGGGGACTTCAAC…	1079	25.98	8.95e-30	At: CYP86A2. unspecific monooxygenase	C-16 hydroxylation
53	2_root_contig_1411	CTTGTGTCTTTGACCTTCTCTACAAGCAAGTAGTTCAACATTCATTGCTCCTCCTCCCATCTAAACCCATCACGAAGAACTACTCCATGGACATGGAGCTTCAATCCTTCACTCTTGCATCCGTAGTACCAGCTTCACTGCTGTTGCTGCTCGCCGTCGTCGTCGCTAGCCGGCTTTTCTCCAAGGGGCAAAAGCGGAATTATCCGCCAATCGCGGGAACCGTCTTCCACCAACTGAAGAACCTCCACCGGTTTGTCCAGTTTCAGACCGACCTCTCCCGCCGCTACAAGACCTTCAGGATGCTCACCCCCTCCCGCAACTACATCTACACCGTCGATCCCGCCAACGTCGAGTACATCCTACGGACCAACTTTGCAAACTACGGGAAGGGGGACTTCA…	1081	0	8.95e-30	At: CYP86A2. unspecific monooxygenase	C-16 hydroxylation
54	stalk_contig_18106	GGTCATTGTAAGTGTAAGCATTTCTCTTTGAAGTTCAAAAACTCTTTTTCCTTCTTCAAAGCTACTTCCAAATCCAGCACGAGCTAAGACATCACTTGAAACATTTTGGACAAAGGGCCATACATCTAACTCACAAGGCCCATTGGATGAAGATACTACTTTGTCCAATTTGTTGATCATATCATCACATGATATGCAAAATATTGGTATCAACATCTTCATGTTCTCAACATAGAATGCTGGGCTGACAATTTTTCTGTGTTTGGCCCATTTATC	276	0	2.39e-29	Sl: CYP72A186. GAME7	C-22 hydroxylation
55	stalk_contig_7624	GTGAGGCGCAGAGCAGTACTTCCATCTTTGCTTAAGAAGTTTTTATCTTTAATGGTAGACAAGGTGTTTTGCACATGTGCTTTAAGGCTGGTGGGAAAGCTTAAGCCATATGCTATGAATGGTGCTGCTGTGAACATGGAGGAGAACTTTTCTCAGTTAACTTTAGATGTAATAGGTCTGGCCTTGTTTAACTACAATTTTGATTCGCTTACATCAGATAGTCCGGTTATTGATGCAGTTTACACTGCACTGAAAGAGGCAGAGGCTCGCGCTACGGACATTTTACCATACTGGAAGATTAATTTTCTATGCAAGATTATACCAAGGCAGATAAAAGCTGAGCGAGCAGTTACTATAATTAGGAAAACAGTTGAAGAACTTATCAAAAAGTGCCAAGAG…	410	0	4.8e-29	Mt: CYP97B28	b-hydroxylation
56	stalk_contig_3465	GGACTTTGTACCGTTGATGAGTGGCTCAACCTCGGTGGGGGGAAGAAGAGGTTATCGAGCCTGCACAGCTCGATGGATCAATTCTTTCAGGGGCTTATCGAGGAGCATAGGATAAAGACGGACGAAATTGAGGAGGCTGCGAAAAAGGAAAAGACGGTGATCGGAGTTATGTTGTCCATGCAGAACTCCGATCCCGGGTACTACACCGACGATGTCATCAAGGGACTCATATCCACTTTGTTGTTGGCCGGAACGGACACTTCAGCCGTCACAATCGAATGGGCGATGTCACTCCTCCTCAACAATCCCGACTCATTGAAGAAAGCGCAGGCCGAGATCGACGCCAATGTCAGAAACAACCGCCTCCTACAAGAGTCGGACCTCTCGAACCTCCCCTAC…	666	0	6.8e-29	Mt: CYP97B27	b-hydroxylation
57	leaf_contig_7156	TTTCACCATGAACCATGTCAAAGCACTTCTACTGGACATGGTGATCGGAGGGACGGACACCTTGTCGACCACTATGGAGTGGGCGATGGCGGAGATGTTGGACAAGCCCGAGATCATGCAGAAGGCGCAAGAGGAGCTCGACCGAGTGGTGGGGAGGGACGCGGTCGTCGAAGAGCACCACTTCCCTAAGCTCCACTACCTCTCCTTCGTGATCAAAGAGGTGCTCCGCCTCCACCCGACCCTCCCCCTTTTGGTCCCGCATTGCCCGAACTCCTCCACCACCGTCGGCGGCTACGACATCCCCAAGGGCGCCCGCGTCTTCGTCAACGTGTGGGCCATCCATAGGGACCCTTCGGTATGGAAGGATCCCTTGGCTTTCAAACCCGAGAGGTTCGCGGG…	506	16.35	6.81e-29	Mt: CYP97B38	b-hydroxylation
58	stalk_contig_1362	AGGTACTATAATTTTGTTTTTATGTAAATTTGGATCGTGACATGGAACTAGGGTGGTGACGGGGACGCGAGGAGGTTCCAAGGGATGGTGGCGGAGACGTCCAAGCTCGCGGCGTCGTCAAATATTCGGGACTTTGTACCGTTGATGAGGTGGCTCAACCTCGATGGGGTGAAGAAGAGGTTGTCTAGTCTGCAGAGCTCGAGGGATCAATTTTTGCAGGGGCTTATCGATGAGCATAGGAGAAAGGCAGACAAGGATAAGGATGAGAAGACGGTGATCGGAGTTCTGTTGTCCTTGCAGAACTCCGACCCAGAGTACTACACCGACGTTGTCATCAAGGCACTCATAGTCAGTTTGTTGTCGGCAGGAACGGACACTTCATCCGACGCAATCGAATGG…	1164	0	8.41e-29	Mt: CYP97B36	b-hydroxylation
59	stalk_contig_567	CTTATCAAAAATATTCACCATGGATGCCAACTTCTCCTACCTCGCAATCACCCTCTCTATCCTTTTCATTTTCATCATTAAAAAGCTATTTTTCAAGACGGACAGAGGCGATCTCCCGCCTAGCCCTCCGTCGTTTCCGATCATCGGCCACCTCCACCTCTTAAAGAAGCCCCTCCACCACGCCCTCGCCCGAATCTCCGCCCGATACGGCCCCGTCCTCCTCCTCAAATTCGGCGCCCGCCCCGTCCTCGTCGTTAATTCCGCCGCCGTCGCCGAGGAGTGCTTTACGAAGAACGACGTGGCCTTCGCCAACCGCCCCCAACTGCCGACCCGTGGGCACATCACCTACAACTACAACACCCTCGGGGCCGCCAACTACGGTCCCCACTGGCGCAACAT…	1750	0	1.37e-28	Mt: CYP97B20	b-hydroxylation
60	leaf_contig_9686	AACCCGTTGAATTTGGAGCACGTGCTGAAAACCAACTTCGGGAACTACCCCAAGGGGGAGTACCAGATTGCGCCGCAGTTGGACATCCTCGGCCGTGGGATCTTCAACGCCGACGGAGAGCATTGGAAGTCTCAGCGGAGGACGGCGAGCCTCCAGTTCAACACAAAGAACATTAGAAACTTCATCATGGACGTCGTCACCCACGAGATCGACAATCGCCTCGTCCCCTTCCTCCAAAAGGCTGCGAACTCCGGCGAGGTCTTTGACATGCAGGTAACCCGCTCCGTTCGAATTGGGATAATTGGCGTTAAGTCTCATGTACACTTGTGTACACAAAATTTTATGTTCTTAGTTCTTTCTTTTAAGTGGGGCTAGGACTGTGACTAAAACGATCTGCTG…	433	13.66	1.96e-28	Vc: CYP94N1v2	C-26 hydroxylation
61	leaf_contig_254	TGTGTCTTTGACCTTCTCTACAAGCAAGTAGTTCAACATTCATTGCTCCTCCTCCCATCTAAACCCATCACGAAGAACTACTCCATGGACATGGAGCTTCAATCCTTCACTCTTGCATCCGTAGTACCAGCTTCACTGCTGTTGCTGCTCGCCGTCGTCGTCGCTAGCCGGCTTTTCTCCAAGGGGCAAAAGCGGAATTATCCGCCAATCGCGGGAACCGTCTTCCACCAACTGAAGAACCTCCACCGGTTTGTCCAGTTTCAGACCGACCTCTCCCGCCGCTACAAGACCTTCAGGATGCTCACCCCCTCCCGCAACTACATCTACACCGTCGATCCCGCCAACGTCGAGTACATCCTACGGACCAACTTTGCAAACTACGGGAAGGGGGACTTCAAC…	2639	25.98	3.16e-28	At: CYP86A2. unspecific monooxygenase	C-16 hydroxylation
62	stalk_contig_587	CTTATCAAAAATATTCACCATGGATGCCAACTTCTCCTACCTCGCAATCACCCTCTCTATCCTTTTCATTTTCATCATTAAAAAGCTATTTTTCAAGACGGACAGAGGCGATCTCCCGCCTAGCCCTCCGTCGTTTCCGATCATCGGCCACCTCCACCTCTTAAAGAAGCCCCTCCACCACGCCCTCGCCCGAATCTCCGCCCGATACGGCCCCGTCCTCCTCCTCAAATTCGGCGCCCGCCCCGTCCTCGTCGTTAATTCCGCCGCCGTCGCCGAGGAGTGCTTTACGAAGAACGACGTGGCCTTCGCCAACCGCCCCCAACTGCCGACCCGTGGGCACATCACCTACAACTACAACACCCTCGGGGCCGCCAACTACGGTCCCCACTGGCGCAACAT…	1732	0	6.59e-28	Mt: CYP97B22	b-hydroxylation
63	leaf_contig_82	TGTGTCTTTGACCTTCTCTACAAGCAAGTAGTTCAACATTCATTGCTCCTCCTCCCATCTAAACCCATCACGAAGAACTACTCCATGGACATGGAGCTTCAATCCTTCACTCTTGCATCCGTAGTACCAGCTTCACTGCTGTTGCTGCTCGCCGTCGTCGTCGCTAGCCGGCTTTTCTCCAAGGGGCAAAAGCGGAATTATCCGCCAATCGCGGGAACCGTCTTCCACCAACTGAAGAACCTCCACCGGTTTGTCCAGTTTCAGACCGACCTCTCCCGCCGCTACAAGACCTTCAGGATGCTCACCCCCTCCCGCAACTACATCTACACCGTCGATCCCGCCAACGTCGAGTACATCCTACGGACCAACTTTGCAAACTACGGGAAGGGGGACTTCAAC…	4873	7.55	8.02e-28	At: CYP86A2. unspecific monooxygenase	C-16 hydroxylation
64	leaf_contig_2384	GTTCGTAACGAAAATTATACAACACTAGATGTTTACATACTTTCACTTCAAATTCAATATTATTGTACTATAGCTAGCACAATACTTTCCACACAAGGTTAACATGCAACTATTTGGAGACGGGCACTGCTTGCAGTGGCACAGCCTTAGCCAAGGTGAGCCCAAAGTTCTCATCCATGTTTATATCCTCGGCCTTCATCCCGCCCGGCAGCTTCCAATCAAAGGCGTGCAGCAGCGACGCCAGCATCAGGTGCACCATCCTAAACGCCAGCGGCAACCCGGGGCAAATCCGGCGCCCCCCGCCGAAGGGGATCAGCTCAAAATCCCGGCCCTTGTAGTCAATTTCCTGCCCCAAGAACCGCTCGGGCTTGAACAAGTCCGCATCGGCCCAAACATCGG…	956	0	1.14e-27	Mt: CYP97B50	b-hydroxylation
65	leaf_contig_864	AACTAAACAAACACCACCTAAAGGAGAACAGACGATGCGGGGGGCTAAACTAATTAGAAACACTAATTCGACGAGACCGTCGCCGCCGTCGTCGTCGCCATGATGGGAATAGCTCGAAGCGGAGTTGCCTTAGCCAGTGTGACGCCGAACTTCTCCCTCATGTCGTCGTGCTCCGCCCCTTCCGGAAGCTTCCACTCGAACGATCGCAGCATCGACGCCAGCGACAGGTGAACCATCCGTACGGCGAGCGGCATCCCGGGGCATATCCGACGTCCGGCGCCGAACGGGATCAGCTCGAAGTCGCGGCCTCCGTAATCGATTCCGTTCCCGAGGAACCTCTCGGGCGAGAACGAATCCGGGTCCACCCACACACCGTCGTCCCGGCCCATGGCCCACAGG…	1530	3.7	1.37e-27	At: CYP734A1. BAS1	C-26 hydroxylation
66	stalk_contig_2686	AGGTACTATAATTTTGTTTTTATGTAAATTTGGATCGTGACATGGAACTAGGGTGGTGACGGGGACGCGAGGAGGTTCCAAGGGATGGTGGCGGAGACGTCCAAGCTCGCGGCGTCGTCAAATATTCGGGACTTTGTACCGTTGATGAGGTGGCTCAACCTCGATGGGGTGAAGAAGAGGTTGTCTAGTCTGCAGAGCTCGAGGGATCAATTTTTGCAGGGGCTTATCGATGAGCATAGGAGAAAGGCAGACAAGGATAAGGATGAGAAGACGGTGATCGGAGTTCTGTTGTCCTTGCAGAACTCCGACCCAGAGTACTACACCGACGTTGTCATCAAGGCACTCATAGTCAGTTTGTTGTCGGCAGGAACGGACACTTCATCCGACGCAATCGAATGG…	783	0	2.12e-27	Mt: CYP97B35	b-hydroxylation
67	stalk_contig_1840	CGAAGTTGCGTGTGCTTGATTTGAATGGACGCAGGCGGAAAGTGGCGGAGATGTTCGAGAAGTTGTTTGCAATCTTTGATGAGATGATCGACCGTCGATTGCATGAGAAAAAGGCAGAGCAGAAGGTGAAGGGACATGTAGTCGCCGGTGGTGCCGCCGGTGACTTTTTGGATTATCTCATCCAATGTCACCTCGGTGAGAGTGATATTGAGCTCGACCGACGTGCCATGCGATCCCTAATGTTGGAACTGTTCCTCGCGGGTAGCGACACCACCACGAGCACCGTGGAGTGGGCGATGGCTGAGCTACTCCGCAACCCAGAGTCGATGTCGAAGGTCCGGGCGGAGATCTCGTCTGCCGCTGACCCCGGAAATGACTTATCTGAGTCCGATATCGGAA…	989	0	3.41e-27	Mt: CYP97B31	b-hydroxylation
68	stalk_contig_8189	GGAGGAGGCATGCGGGGGAGACAAGGAGGAGTTCAGGCCGGAAAGGTGGTTGGACGGGGAGGGGTTGTTCAGGCCGGAGAGCCCGTTCCGGTTTCCGGTGTTCCACGCGGGGCCGAGGACGTGCGTGGGGAAGGAGATGGCATACATACAGATGAAGTTGATCGCGGCGAGCGTGGTGGAAAGGTTCGAGATCGACCTCGTCGGTGGTAGGGCACCAGAGCTTCTCTTCTCACTGACCTTGAGGGTAAAAGGAGGTTTTCTTGTTAGGGTGAGAGAAAGAGAGATGGAGTGATAATTATGGTATTTACTTGTATTTTCTTGTTTTATTATTATGCCAAGTATAAATAAAACTAGTTAAAAGTGTGATTTCTAAGTTTAGAGAAAAAAATAAAAA	394	0	5.19e-27	Vc: CYP94N1v2	C-26 hydroxylation
69	stalk_contig_8674	GATGGCTGGATGCTTCTGGTGCACAGAAATCTGGGTACATGCCATTCGGAGGAGGAGCTCGGCTATGCCCCGGATCGGACCTCGCACGATTAGAGATGATCGTCTTCATTCATCATCTCATCTTGAAGTATAATTGGAAGCTCGCGTCATCCGTGCACCCCCTCGCAACACCGCTTGCCTACTTTCCCAACGGCCTACCGATCAAGATTGAAGCCTTGAAGCCCGAGACAGTCGTTTGAAAAACTTGAGAAGTGGGAATATAATTATCAAGAAATAAAAATATACGTGTTTGCTTGCCCGAATTATTTTAGCTCAAAGTTTTACCTCTGCTATATTCGAGAAGAAAAGATTCAAGCATTTCTATCTGACTCATAAAAATTAC	382	0	7.98e-27	At: CYP90B1. DWF4	C-22 hydroxylation
70	stalk_contig_3281	GGACTTTGTACCGTTGATGAGTGGCTCAACCTCGGTGGGGGGAAGAAGAGGTTATCGAGCCTGCACAGCTCGATGGATCAATTCTTTCAGGGGCTTATCGAGGAGCATAGGATAAAGACGGACGAAATTGAGGAGGCTGCGAAAAAGGAAAAGACGGTGATCGGAGTTATGTTGTCCATGCAGAACTCCGATCCCGGGTACTACACCGACGATGTCATCAAGGGACTCATATCCACTTTGTTGTTGGCCGGAACGGACACTTCAGCCGTCACAATCGAATGGGCGATGTCACTCCTCCTCAACAATCCCGACTCATTGAAGAAAGCGCAGGCCGAGATCGACGCCAATGTCAGAAACAACCGCCTCCTACAAGAGTCGGACCTCTCGAACCTCCCCTAC…	688	0	1.08e-26	Mt: CYP97B16	b-hydroxylation
71	root_contig_9271	ATCTGGGATAAAGAAGAGCGACAACTTCACACCGTTCAGTGGAGGAGCCCGGATTTGCCCGGGATCTGAGCTCGCCAAGTTGGAGATGACTGTATTTCTTCACCATCTCATACTGAACTATGAGTGGGAGTCCGTAGAGCCTGACCATCCTGTGAGCATACCGGTCATCAAGTTCCCTAAAGGACTACAAATTAGGGTCAGGGCCCTGCCAAATGAGATGGAGATGATGTAGGCATCTGGAATTCAATGATTTCGATGAATTATTCAAAGAAATCACTTGGCAACACAAAGGAAAGAAGAAATTGTTACCATGAG	315	0	1.12e-26	Os: CYP90B2	C-22 hydroxylation
72	stalk_contig_970	CTTATCAAAAATATTCACCATGGATGCCAACTTCTCCTACCTCGCAATCACCCTCTCTATCCTTTTCATTTTCATCATTAAAAAGCTATTTTTCAAGACGGACAGAGGCGATCTCCCGCCTAGCCCTCCGTCGTTTCCGATCATCGGCCACCTCCACCTCTTAAAGAAGCCCCTCCACCACGCCCTCGCCCGAATCTCCGCCCGATACGGCCCCGTCCTCCTCCTCAAATTCGGCGCCCGCCCCGTCCTCGTCGTTAATTCCGCCGCCGTCGCCGAGGAGTGCTTTACGAAGAACGACGTGGCCTTCGCCAACCGCCCCCAACTGCCGACCCGTGGGCACATCACCTACAACTACAACACCCTCGGGGCCGCCAACTACGGTCCCCACTGGCGCAACAT…	1369	0	1.67e-26	Mt: CYP97B24	b-hydroxylation
73	root_contig_562	GTCGTACGCAATTGAAGCACAAAGGGTCTCACAACACTCGCAGCCTCCACTTCCACTCTCTCCCACGTGATAGTAGGGATGGGTATGTGCAGGTGGGGATTGTGTATGCTAATTGTGTACCCATAACATTGCTCTTTAATCAATTGGCAATGACGACGGGGATGATCTCGAGCGGAACGACCCTCGCTACGGTGAGCCCCACTTTCTCGGTCATGTCGATGTCGGTTCGTTTCATCCCTTCCGGCAGCTTCCAGTCAAAGGAGTGAAGCAGCGATCCGAGCATGAGATGAACCATCCTGAAGGCCAGCGGGATCCCCGGGCAAATCCTCCGCCCCGCACCGAAGGGGATCAGCTCGAAGTCCTGCCCCGTGTATGTTATGCTGCCGCTCATGAAACGCT…	1714	0	4.14e-26	St: CYP72A188. PGA2	C-22 hydroxylation
74	leaf_contig_3599	AGATAATTAAGGCCCTCATCACGGTAAACTCCGATTACCAAAAATTAATTTATTTGATTCTGTCAAAAACAATATAATTTATTTAATTTCCGCGCTTGTGAAGCACATGTGTTTTTTTTAAGGGGCAACTTGGTCAAAACCCCAATCAACAAGGCCAACTTGTTCTACGGTCCTGTCACTGATACAAAAAACAGTAAAGCTATCGCCCCAAAACCGCTCACATGTAATGAGAGATGCACAGTTGGTTACAAAAGAGTGTATATATGTGTACACGAGGATCTAAGACCAATTTGCCTGACTATTTTTATGATCAGCTAACAGCCTAACACTAAACACTCATTAGATCGATCTCATCACTTTTGTATGTTCGAAGAGCTTGCTGACGGCGGGGACCGACAC…	748	41.52	4.75e-26	Mt: CYP97B46	b-hydroxylation
75	root_contig_12661	GCACAATTTACGATCGAACGGCACCGGCGGGAACAGCCTCAGAGACTCCGATATCGCCGCGTGGAGGTAATGCATCTTCCGCAGCTCGTCGAACCCGAACGGCTCTTTGGTCGGGCGCTCACCGGCGGCTCGGATCGAGTCGACCTCCGCCCGGATCCGCTCCTTCACTTCCGGCCTCGTGGATAGAAGCCAGAAGAACATAGTCAGCGCCGACGACGTCGTCTCCCGCCCCGCTAGGATGAAGCTCGTCACGGCCTCTAAGAAGCTGCCCACGG	275	0	1.16e-25	Vc: CYP94N1v2	C-26 hydroxylation
76	leaf_contig_10323	GCCGCCAGTGGTGGCCGTCGGCGTTGAAGATCCCGCGGCCGAGGAAGTCGCGCAAGACGGAGGTTATGCGGTCGCCTTTCGGGTAGTTGTGGAAGTTGTGCTTTAGGATGTGTGCGAGGTTGGCGGGGTCGGCGGTGAAGATGCCGGAGACGTCGCCGGGGATTTGGACGACGAACGTGTGGGTCTGGGAGCGGAGGAGGAGTTCGGTGGTCCATTCAAGGAAGCGGTGGCGGTTGGCGATGAATTGGGGGAGGTTGCCGAGGAGCGGGTAGGGTTTTAGGGGTGAGGGTTTTGTAGGGTTTTTTGTTCTACTAGGGTTTAGGTAGAGGAATAGAATGACTAAGAGAGGGAGGAGGAAGAGATAGTGGAGCTCCATGGTTCTCCCTTTTTTTTTTTTTG…	420	0	1.86e-25	Vc: CYP94N1v2	C-26 hydroxylation
77	stalk_contig_894	CTTGAAGTATCCTCTGCAGGACTCCTCCATTCGTGAAGATGATCACAGGGAACGAGTTCGCGAGAGCAGCGGCTCTAATGGTGGCCGCGGTCGTGATCTTCGTCGTACTCAAGGCCAGAAACCAACCGGGGAATCTCCCGCCCGGCCCCCGAGGCCTCCCTCTGCTCGGCTACCTCCCCTTCCTCCGTCCCGACCTCCACTGCTGCTTCGCCGAGCTGGCCGTAGCATACGGCCCCATCTTCAGCCTCCGCCTCGGCTCCAAACTCTGCGTGGTTGTAACCTCCCCGGCCGTCGCCCGCGAGGTCCTCAGGGACCACGACGCCTTGTTCGCCAACCGCGACAGTACGGTGGCCATCCGCGCCTACAGCTACGGAGGCAACATGGGGTGGGCCCCGCTCG…	1427	0	2.63e-25	Mt: CYP97B34	b-hydroxylation
78	stalk_contig_34186	TGATTTTGCAAGAAAGTCTAAGGCTATACCCACCAGTTATCATGCTATCTAGATTTCTTCGAAAAGACACAAAACTTGGAGAACTTACACTTCCTGCAGGAGTAGAACTCATAGTACCTGTATCAATGATGCACCAAGAAAAAGAATTTTGGGGAGATGATGCTGGAGAGTTCAAACCAGAGAGATTCTCTGAAGGAGTTTCAAAGG	207	0	3.32e-25	Sl: CYP72A186. GAME7	C-22 hydroxylation
79	root_contig_454	GTGACTTCATTGATCCTCACATAGAGAGAGTTCGAGAGAGTGAGAGGTGNMYWYWMMGANTKGAGCTACCATTCCCCCAATGGCTTGTATTTTTTGTTATGGTAGTCGTCTTACTACTTGTAAAAATGAGCCTCAAATCTAGGCGGTACGGCCCGCTCCCACCGGGCCCAAGCCCGCTTCCGATCATTGGAAACCTCCTGATCATTGGCAACAAGCCCCACCGCTCCCTCGCTGGCCTCGCCAAGACCTACGGGCCCCTCATGTCCGTCCGGCTCGGGACCGTCACCACTGTCGTGGTCTCCTCCCCCAACGTCGCCCGTGAAGTCCTCAAAAACCGTGACCAGGACTTTTGCGGCCGCTCCCTCCCCGACGCCGTCTTGGCCCTTGGCCACGGAAAGC…	1933	169.18	2.02e-24	Mt: CYP97B11	b-hydroxylation
80	leaf_contig_493	TGCTAGAGTAAACGAAAACCAATCTATCTTAGCATGTAAACGASTCRTRNGCTTWNCMKAWMWGMAAMATATTAATCATTAATCACCACCCTCAAAACTAAAAGGGTTATGTAATACACACGGATCATCATTTTTTTTATTTATATATATAATATGTATATATATAAAGGGAGTAAAAGGGAGAGCTGTGTCACCCGGCACAAATTGATATATATGTATCAATTTGTATTATTTATTTGCATGCTTGACGATCTCCAACGTAACAATATATGATTGACTATATCACGGCATCGAGGGGATGGCTCGAAGGGGAACGGCCTTGCCTAAGGTGAACCCGAATTTCTCCTCCATGTCCAACTCCCCGGGTGTGATCCCGTCGGGCAGCTTCCACTCAAACGA…	1933	66.66	2.02e-24	Mt: CYP97B42	b-hydroxylation
81	stalk_contig_473	GTGACTTCATTGATCCTCACATAGAGAGAGTTCGAGAGAGTGAGAGGTGAACACAAAGATGGAGCTACCATTCCCCCAATGGCTTGTATTTTTTGTTATGGTAGTCGTCTTACTACTTGTAAAAATGAGCCTCAAATCTAGGCGGTACGGCCCGCTCCCACCGGGCCCAAGCCCGCTTCCGATCATTGGAAACCTCCTGATCATTGGCAACAAGCCCCACCGCTCCCTCGCTGGCCTCGCCAAGACCTACGGGCCCCTCATGTCCGTCCGGCTCGGGACCGTCACCACTGTCGTGGTCTCCTCCCCCAACGTCGCCCGTGAAGTCCTCAAAAACCGTGACCAGGACTTTTGCGGCCGCTCCCTCCCCGACGCCGTCTTGGCCCTTGGCCACGGAAAGCG…	1932	3.28	2.02e-24	Mt: CYP97B32	b-hydroxylation
82	stalk_contig_717	GGGATATTAGCTCTTTATTTTTTTCCGTTCACAAATTAAGTAGTCCCTCCTCGCGCACAGATTCGAGCTCGGAGTGGGTTCTTCATGACGACGGTGAATTCCGAGGCCTCCGTGAGGTCCACCTCCTCCCCCTCGACCTCCTTCCACTCAAACTCTTTAACGAGATTGGCGACGAAGTACTCGAGGTGGAGCATGGCGATCCCGAGCCCCGGGCAAATTCTCCGCCCGACCCCGAACGGCATCATCTTGATCTCCCTGCTCCCCGTTATATCCACCCCCTCCCCCTCGCCGCCGGCCATAAACCTCTCGGGCCGGAACTCCATCGGTTCCGCCCAAATCTCCGGGTCCCAATTCATGTCCGCCACCATGAAGTTCACCGACGCCTCCTTCGGGATTACG…	1595	0	2.91e-24	Gg: CYP88D6	C-11 hydroxylation
83	root_contig_12302	AGATGGTGGGCTCCTTGGTGGCGCTGCTGGTGGCGGGTTACGAGACCACCTCCACCATCATCACCCTCGCCGTCAAATTCCTCACCGACGCTCCGCCCGCCCTCCAACTCTTACAGAAAGAGCATGAAGAAATTAAGGCCAGGAAGGAGGAGACGGAGACGTTGGACTGGAGCGACTACAAGGCCATGCTTTTCACGCAATGTGTGATCAACGAGACACTTCGAGTAGCCAACGTCATCAGTGGTGTGTTCAGTCGAGCTAAAAAATCCTAAAAACAA	278	0	4.11e-24	Vc: cyp90B27	C-22 hydroxylation
84	root_contig_1777	TGAATGTGTTTGTGGGGGGCATCATAGAGGAGCACAGGAGGAAGAGGGTTAACGGCTCTGTTTCTGATGGCGTCGGCGACTTCGTCGATGTCCTGCTTGACCTCGAGAAGGAAGAGAAGCTCTCTGATTCCGACATGGTTGCTGTCCTCTGGGAAATGATCTTCAGAGGCACTGATACCGTGGCAATCCTTTTGGAGTGGATCATGGCTAGAATGGTCCTTCACCCAGAAATCCAATCCAAAGCCCAAGCGGAGATCGACGCCGTCGTCGGCGCCGCCGGAAACAACTCTCGCGGCGTCACCGACGCCGACATTGCCCGCCTTCCGTACCTCCAATCGATCGTCAAGGAGACCCTCCGCGTGCACCCACCGGGCCCGCTCCTCTCGTGGGCCCGCCTCG…	929	0	5.5e-24	At: CYP734A1. BAS1	C-26 hydroxylation
85	leaf_contig_1559	TGTGTCTTTGACCTTCTCTACAAGCAAGTAGTTCAACATTCATTGCTCCTCCTCCCATCTAAACCCATCACGAAGAACTACTCCATGGACATGGAGCTTCAATCCTTCACTCTTGCATCCGTAGTACCAGCTTCACTGCTGTTGCTGCTCGCCGTCGTCGTCGCTAGCCGGCTTTTCTCCAAGGGGCAAAAGCGGAATTATCCGCCAATCGCGGGAACCGTCTTCCACCAACTGAAGAACCTCCACCGGTTTGTCCAGTTTCAGACCGACCTCTCCCGCCGCTACAAGACCTTCAGGATGCTCACCCCCTCCCGCAACTACATCTACACCGTCGATCCCGCCAACGTCGAGTACATCCTACGGACCAACTTTGCAAACTACGGGAAGGGGGACTTCAAC…	1173	25.98	1.12e-23	At: CYP86A2. unspecific monooxygenase	C-16 hydroxylation
86	leaf_contig_770	GGGATATTAGCTCTTTATTTTTTTCCGTTCACAAATTAAGTAGTCCCTCCTCGCGCACAGATTCGAGCTCGGAGTGGGTTCTTCATGACGACGGTGAATTCCGAGGCCTCCGTGAGGTCCACCTCCTCCCCCTCGACCTCCTTCCACTCAAACTCTTTAACGAGATTGGCGACGAAGTACTCGAGGTGGAGCATGGCGATCCCGAGCCCCGGGCAAATTCTCCGCCCGACCCCGAACGGCATCATCTTGATCTCCCTGCTCCCCGTTATATCCACCCCCTCCCCCTCGCCGCCGGCCATAAACCTCTCGGGCCGGAACTCCATCGGTTCCGCCCAAATCTCCGGGTCCCAATTCATGTCCGCCACCATGAAGTTCACCGACGCCTCCTTCGGGATTACG…	1595	0	1.33e-23	Gg: CYP88D6	C-11 hydroxylation
87	4_leaf_contig_806	GGGGGTAAAAGTGTAATTAACCCTAGTAACACTAGTGCAGATGTAGAAATAATTTACAAAGGACCGTACAATGCTTTATTATTACTTTTCAACCACACACACGCTGTACCTGTACGTAGATTATTCGTTAATAAAAGCCTTCAAATTGATATTGGCTTAGCCACGAGATGAAGCGGAATTTTCTTGTTAACCGTAATCCCGGGCAACTCATCCAAATCCAGATCATCCGGTTTCATTCCATCGGGCAGTTCCCATTCGAAATTGTACACTAAGCTGGCCAAAGCGAGCTCGACCAACGCCGTCGCCGACCGAACCCCGGGGCAGATCCTCCGACCGATGCCGAACGGCACTGTCTCGAAACCCGGGCCCGTGTAATCGATTTCCTCGCCCGAGAACCTC…	1569	48.62	1.87e-23	Gg: CYP88D6	C-11 hydroxylation
88	4_stalk_contig_740	GGGGGTAAAAGTGTAATTAACCCTAGTAACACTAGTGCAGATGTAGAAATAATTTACAAAGGACCGTACAATGCTTTATTATTACTTTTCAACCACACACACGCTGTACCTGTACGTAGATTATTCGTTAATAAAAGCCTTCAAATTGATATTGGCTTAGCCACGAGATGAAGCGGAATTTTCTTGTTAACCGTAATCCCGGGCAACTCATCCAAATCCAGATCATCCGGTTTCATTCCATCGGGCAGTTCCCATTCGAAATTGTACACTAAGCTGGCCAAAGCGAGCTCGACCAACGCCGTCGCCGACCGAACCCCGGGGCAGATCCTCCGACCGATGCCGAACGGCACTGTCTCGAAACCCGGGCCCGTGTAATCGATTTCCTCGCCCGAGAACCTC…	1569	0	1.87e-23	Gg: CYP88D6	C-11 hydroxylation
89	stalk_contig_2652	TAATACTTAAAAAGAAAAAGGATAAAGAAGAAAATTACATCATATCATAATAATACCAAAGAGAAACTAATTAATTGAGAATACGTGTCTTTGAGGCGTGGGATTCATTGAATCTCAATGATATTTTATTGAAATAGATTATTCAAACAATACCCATAACCATTTGTGTTGTTCCATGTATGTTTTATGAGGAAAGGAGTTTAGCTGCAACACCAGCTCTTGCAAGAGGAACACACATGAGATTATGTGCTCTTGGAACTGTGAGACCAGGTCTCTCATCCATGCTAACCTTAGCATCTCCACCTTTCAATATTTGTCCATGTGGGCCAGGTACCTGTAGATCAAAGCACTGTATAATTGATGAAAGTAGTGTGGCCATTCCTGCAGTAGCTAAATTAA…	788	0	3.38e-23	Mt: CYP97B29	b-hydroxylation
90	stalk_contig_25354	GAGAGCCCGTACCGTTATCCGATTTTCCACGCGGGGCCGAGGGGGTGCTTGGGAAAGGAGATGGCATATATACAGATGAAGTCGATCGCCGCGAGCGTCCTCGAGAGGTTCGAGATTGATCCGGTGGTGAAGGGGACGACGCCGGAGCATGTGCTCTCAATGACGTTGAGGATGAAAGGGGGGCTCCATATCAGAGTTAGGGCGAGAGAGGGAGGGCGTGGTGTTTGAGTCTTGAACGAC	240	0	4.57e-23	Vc: CYP94N1v2	C-26 hydroxylation
91	leaf_contig_79	TGTGTCTTTGACCTTCTCTACAAGCAAGTAGTTCAACATTCATTGCTCCTCCTCCCATCTAAACCCATCACGAAGAACTACTCCATGGACATGGAGCTTCAATCCTTCACTCTTGCATCCGTAGTACCAGCTTCACTGCTGTTGCTGCTCGCCGTCGTCGTCGCTAGCCGGCTTTTCTCCAAGGGGCAAAAGCGGAATTATCCGCCAATCGCGGGAACCGTCTTCCACCAACTGAAGAACCTCCACCGGTTTGTCCAGTTTCAGACCGACCTCTCCCGCCGCTACAAGACCTTCAGGATGCTCACCCCCTCCCGCAACTACATCTACACCGTCGATCCCGCCAACGTCGAGTACATCCTACGGACCAACTTTGCAAACTACGGGAAGGGGGACTTCAAC…	4967	12.55	5.02e-23	At: CYP86A2. unspecific monooxygenase	C-16 hydroxylation
92	leaf_contig_39489	GGCAGTGGCTGACGTGGAGTACAAAGGATACCTTATTCCAAAGGGATGGAAAGTGATGCCTTTGTTCAGGAACATACATCACAACCCAGATTTCTTCGTGGACCCGGAGAAGTTAGAGCCGTCTAGATTCAAGGTTCCACCAAAGCGCAACACGTTTTTGCCGTTTGGGAATGGGGTTCACGCTTGTCCCGGCAATGAGCTTGCCAAGATTGAAATTCTTCTTCTGATCCACCATCT	237	0	1.91e-22	Gg: CYP88D6	C-11 hydroxylation
93	leaf_contig_21578	GTGCAGATGTTGTCGAAGGTGAATCGGAGGAACACGTCCTGGAGGTCGACGGTGCCCTCGGTGTCCGCAAGACGCCCGAGCAGCGGGAGAAGCTTGGCCTGGACCAGGTCCCGCATCGCGCCGATGGAGAACTCGGAGAAACGCGCCGCGTGCATCTCCGTGCTGGCGGCCCGGCGCTGGTCGCGCCAGCCGTCGTCGTCGGCGTTGAAGATCCCGTCCCCGAGGAAGTCCGAGAAGCGCTCGCGGTAGTAGCGCCCCTTGGGGAAGTTGGGGAAGCGGGTCGTGAGCATGTACACGAT	299	0	2.88e-22	At: CYP86A2. unspecific monooxygenase	C-16 hydroxylation
94	leaf_contig_35334	ATGTATGCAAAGTGTTAGGGACTTCAGCTCTTTGACATCTTCATATCGTGGAAGCCTTCCTTTTAAAACATTGTCGACTTCTTGTTGTGCTCTGATGAGAGAATATGGATCCTTACTTAAAAGATAGAGAGTCCATGTCAACACTGAACCAGTTGTTTCATGCCCTGCAACCAACATTGATAATAGGTCATCTCGCAATTGTGCACTACTAACCTCTTCACGACTTGCTAGTAAAAAACGAAGGATGGTA	250	0	5.47e-22	Mt: CYP97B47	b-hydroxylation
95	root_contig_7158	AGGTGATCGATGAATATTATACACGGATATCATTATATCTTGACCAGCATCAACCTTATAATTTCCAGGAAGCACGTCAGCAACTTGAGCTCGCCTTAATAACACAGGGGGATGTGGGTAAAGAGTCTAAAGACGCATTGATTCATGTATGCAACGTGTTAGGTACTTCAGCTCTTTGACATCTTCATATCGTGGAATCCTTCCTTTTAAAACATTGTCGACTTCTTGTTGTGCTCTTACTTAAAAGATAGAGAGTCCATGTCAACACTGAACCAGTTGTTTCATGCCCTCGACGTAGGTGACGAGGTAGCGGAGGAAACCCCAAGACGGCAGAGGAAAAGAGGTGGGCAGCGAGTTGAGTGAGAATCG	369	0	9.21e-22	Mt: CYP97B13	b-hydroxylation
96	root_contig_12807	GGCTACGAGCGGGAGCTGAACGAGGTGCTTGCGGTCGTTAACCAGTTCTCGATGAACGTTGTTAGAACTATGAAGCAACGTAGCAGAAACGGTGGTGGAAGTGACATCCTTTCCCAGTTCATCGAGGCAGAGGACGGAGACCACTCCGACGAGTTCCTCCGCGACGTCATCATCAGCTTCGTCCTCGCCGGCAGGGACACCACCTCCACCACGATGACGTGGTTCCTCTGGAACCTCGCATCCCACCCGTCCGTCAAGGAGAAAATCCGGGAC	273	0	1.1e-21	Vc: CYP94N1v2	C-26 hydroxylation
97	leaf_contig_29453	GCCGCTGGGGAGGATCTCTGACTGTAACGCCTCTTTTTGCTCGAAGGGCACCGACGGAAAGAGCCTCAAAGATTCGCACAAGGCCGCATGCAAGTAAACCAAATTCCGCAGTTCATCGGGGTGGAACACAATCGATTCCTTTAGCCCCAAACCCCCTTTTCGTGGAAAATGAAACATTAACTCCTCGAGGATCCTTGTTTCCACATTTGGGTTTTTAGAGAGGAGCCAGAAGAACCAAGTGAGCGCGGTGCACGTAGTGTCTCTTCCGG	269	0	1.53e-21	At: CYP86A2. unspecific monooxygenase	C-16 hydroxylation
98	leaf_contig_15146	GAGAGAAGCGCGTTACGGTTCTTTCCGGCGTTCCACGGGGGACCGAGGATGTGTTTGGGGAAGGAGATGGCTTATACGCAGATGAAGTCAGCGGCGGCAAGTTTGATGGACCGGTTCGAGGTGGAGGTGGAAGAGGGGACTGCGGCGCAGCCGCCGGAGCAGTTAGTGTCGCTGACGCTGAGGATGAAGGGAGGGTTGAAGGTGAGGGTTAGGGAGAGGGCAAATTAAGTCTATGATATTGTGGTAGTGGTCTACTACAACTATTACTGCATAATAGTTCAAGTGCTAATATGATCCTAGAAAGTTGTGTTGGGTTTGTTTCTTTGTTTCCCCACGGTTGTATTCTATCA	350	0	1.78e-21	Vc: CYP94N1v2	C-26 hydroxylation
99	root_contig_18360	TACACGACGCTCGTCCGATCGGATGCTTCTGGTGCACAGAAATCTGGGTACATGCCATTCGGAGGAGGAGCTCGGCTATGCCCCGGATCGGACCTCGCACGATTAGAGATGATCGTCTTCATTCATCATCTCATCTTGAAGTATAATTGGAAGCTCGCGTCATCCGTGCACCCCTCGCAACACCGCTTGCCTACTTTCCCAACGGCCAGGCTCGCGCTCACTCGAAGTG	229	0	1.24e-20	At: CYP90B1. DWF4	C-22 hydroxylation
100	leaf_contig_516	AGTATCCTCTGCAGGACTCCTCCATTCGTGAAGATGATCACAGGGAACGAGTTCGCGAGAGCAGCGGCTCTAATGGTGGCCGCGGTCGTGATCTTCGTCGTACTCAAGGCCAGAAACCAACCGGGGAATCTCCCGCCCGGCCCCCGAGGCCTCCCTCTGCTCGGCTACCTCCCCTTCCTCCGTCCCGACCTCCACTGCTGCTTCGCCGAGCTGGCCGTAGCATACGGCCCCATCTTCAGCCTCCGCCTCGGCTCCAAACTCTGCGTGGTTGTAACCTCCCCGGCCGTCGCCCGCGAGGTCCTCAGGGACCACGACGCCTTGTTCGCCAACCGCGACAGTACGGTGGCCATCCGCGCCTACAGCTACGGAGGCAACATGGGGTGGGCCCCGCTCGGCCCC…	1892	9.53	1.8e-20	Mt: CYP97B40	b-hydroxylation
101	root_contig_471	AGTATCCTCTGCAGGACTCCTCCATTCGTGAAGATGATCACAGGGAACGAGTTCGCGAGAGCAGCGGCTCTAATGGTGGCCGCGGTCGTGATCTTCGTCGTACTCAAGGCCAGAAACCAACCGGGGAATCTCCCGCCCGGCCCCCGAGGCCTCCCTCTGCTCGGCTACCTCCCCTTCCTCCGTCCCGACCTCCACTGCTGCTTCGCCGAGCTGGCCGTAGCATACGGCCCCATCTTCAGCCTCCGCCTCGGCTCCAAACTCTGCGTGGTTGTAACCTCCCCGGCCGTCGCCCGCGAGGTCCTCAGGGACCACGACGCCTTGTTCGCCAACCGCGACAGTACGGTGGCCATCCGCGCCTACAGCTACGGAGGCAACATGGGGTGGGCCCCGCTCGGCCCC…	1892	11.98	1.8e-20	Mt: CYP97B9	b-hydroxylation
102	root_contig_6716	GCTAGTCATCAAGGAGACTCTGAGACTGCATCCCTCTTTCCCCTTGCTGCTCCGAGAATGCAAGGACACGTGCCGTGTTATGGGGTACGAGATACCGGCCGGCAGCAGGGTGATAGTCAATGCATGGGCACTAGGCCGTGACCCGCGATACTGGGAGGACGCTGAGGAATTCAAACCCGAGAGGTTCGAGGGCAATTCCGTCGATTTAAGGGGGTCCGACTTCGAGTACTTACCCTTCGGGGCCGGTAGAAGGATATGTCCCGGGATGCATTCCGGATTGGCGAGCGTGGGGCTCACATTGGCCCGACTCCTCTTCCACTTCGATTGGGAGCTCCCGGACGGGAAAAAACCGCACGATGTGGACATGACCGAGAGGTTCGGCT	383	0	2.62e-20	St: CYP72A188. PGA2	C-22 hydroxylation
103	leaf_contig_612	GATCTGTATCACATTGCACCTAATTAATATTACAATATTCCATTATATAATATGAGAGTAGTGCATACCAAATTTTTCATTGCATATTGTATTGTATTTTTTTTTTATTATTCTTATGATCATCATCCTCCACCAATTCTAAAAGGATCCATCTACTCATAGATCCGCGGATCCGAAAACCTCGGAACTGGTACGACGGCCAGAGGCTTCTCCATCTTGAGAACGAGCGCGAACTTATCCGAGAGATCGATTCCTTCCACCCCCTCCGGCAACCGCCACTCGAACGAGTGCAGCAGCGTCGCGAGCAAGTACTTGAGCAACCTCTCTGCCAGTACGATCCCCGTGCAAATTCTTCTTCCTGACCCGAACGGCAAAAACCCGTTCCCGCCGTTGTAGTCC…	1755	3.16	3.19e-20	Gg: CYP88D6	C-11 hydroxylation
104	root_contig_81	CTTATCAAAAATATTCACCATGGATGCCAACTTCTCCTACCTCGCAATCACCCTCTCTATCCTTTTCATTTTCATCATTAAAAAGCTATTTTTCAAGACGGACAGAGGCGATCTCCCGCCTAGCCCTCCGTCGTTTCCGATCATCGGCCACCTCCACCTCTTAAAGAAGCCCCTCCACCACGCCCTCGCCCGAATCTCCGCCCGATRCGGCCCCGTCCTCCTCCTCAAATTCGGCGCCCGCCCCGTCCTCGTCGTTAATTCCGCCGCCGTCGCCGAGGAGTGCTTTACGAAGAACGACGTGGCCTTCGCCAACCGCCCCCAACTRCCGACCCGTGGGCACATCACYTACAACTACAACACCCTCGGGGCCGCCAACTACGGTCCCCACTGGCGCAACAT…	1732	95.75	8.06e-20	Mt: CYP97B1	b-hydroxylation
105	stalk_contig_4417	GGTTATTCTTGCTAAATAGAAATTAATGCAGGACGACCACCATTCTAAATTCTTCACTCTTTCAGTCATGCAGAGGAGTTTCTTCAATATTGTGATCGAGGAGAGGCCATTAAGCATAATTTAGATCTTCGTGCCGCTGTGATACCGAACCTTTCCGTCATGTCCACATCGTGTGGTTTTTTCCCGTCTGGGAGCTCCCAATCGAAGTGGAAGAGGAGTCGGGCCAATGCGAGCCCCACGGTCGCTAGCCCAGAAGCCATCCCGGGACATATCCTTCTACCTGCCCCGAAGGGTAAGAACTCAAAGTTGGACCCTTTGAAATCCACGGAATTGCCCTCGAACCTCTCGGGCTTGAACTCCTCAGCATCCTCCCAGTATTGCGGGTCACGGCCTAGTGCC…	571	0	1.1e-19	Mt: CYP97B25	b-hydroxylation
106	leaf_contig_5530	ATCACTAAAATTCTGTTCCGGAATCGGTGGAACGAGCTGCTGGCTCTACGGCGGCGGGAGGAGGAGGTATTCCTTCCGCTGATCCTGGCTGCGGCCGAGAAACCAAAACAGGGCAGTGCGGGCGATTGCATTTACTCCTACGTCGAGTCGCTCGTTGACGTTCGAATCTCGGATGAGGGAGGACGGAGCCTGACGGAGGGCGAGATCGTGAGCCTCTGCTCGGAGTTCCTCAGCGCGGGGGCCGATTCGACGGTGACGGCGCTGCAGTGGGTCATGGCGAGGCTCGTGAAGCATCAAGACATACAACAAAAGTTGTCCGAGGAAATAGGAAGTGTGGTGGGGACTGAGGCAGAGGAAGTGAAGGAAGCGGATCTGCAGAGGATGCCCTATTTAAAGTCG…	581	22.1	2.14e-19	Gg: CYP88D6	C-11 hydroxylation
107	leaf_contig_4176	CGACCTGCGATACCTCGACGCTGTGGTGAAAGAGGCACTTCGCTTGCATCCAGTGGGCCCCTTTTTACTCCCCCACTGCCCGAGCACAACCTGCACCGTCGGCGGCTATACAATCCCCAAGGGCACCAGGGTTTTGATCAACGCGTGGGCGATACAAAGGGACCCCGGGTCCTGGACCGAGCCTCTCGAGTTCAGGCCGGAGCGGTTCTTGGAAGAAGTCGGCGGAAAAAATAGGGACTTCAACGGCGGTAACGACTTCGTGTTTTTGCCGTTCGGGTCCGGGAGAAGGATCTGTGCGGGGATTCCCCTCGCGGAGAGAATGCTGAAGTACTTGATCGCCACGCTGCTGCACTCGTTCGAGTGGAGGTTGCCCGAGGGAGAGAAGGGGCTCGATTTCTC…	683	9.53	6.6e-19	Mt: CYP97B45	b-hydroxylation
108	leaf_contig_12417	CCCGAATTTCTCCTCCATGTCCAAATCCTCGGGCGCGATCCCGTCCGGAAGCTTCCACTCGAACGACCGCAGAAGCGACGCCAAAATCATGTGAATCATCCTCGCACCAAGCAGTAGCCCGGGGCAAATCCTCCGCCCGGCGCCGAACGGTATCAGCTCGAAATCGCGCCCTTTGTAGTCGATGCCACCATCGATATCCGAAAACCGCTCGGGGGTGAAGGAATCCGCATCTTTCCAAACGTCCGGGTCCCGCCCGATGGCCCACGCGTTGACGAGGACGCGGGTGTGCTTCGGGATCGTGTAGCGCCCGAATTGGATGGTGGACTCCGTCCGGCGGGGGAGGAGGACGGGAGCCGGGGGGTGGAGGCGGAGCGTCTCCTTCAC	384	18.55	1.6e-18	St: CYP72A188. PGA2	C-22 hydroxylation
109	leaf_contig_26241	AGCATTTTAGGATTCAACAGAGAAGAAATGGCAGCTCGCAACTCACTTGGTCCGAAGTGAATAACATGCCATATACCAACAAGGTTATAAGTGAAACACTTCGGAAAGCTACCATCTTGCCGTGGCTTTCGAGAAAAGCAGCCTCCGATTTTGATGTGGAAGGACACGAGATTAAGAAAGGTTGGTCGCTGAATTTGGATGTAATCTCTATTCACCATGATCCGAATCTTTTTGCTGATCCTGAAAGGTTTGATCCATCAAGGTTCGAGAGATCGGAAGA	280	0	1.73e-18	Sg: CYP87D18	C-11 hydroxylation
110	leaf_contig_52926	AGCAACGTAGCGGCACCGGTACTGGTGGAAGAGACATCCTTTCCCACTTGTTCGCGGCGGAGGGCGGAGACCACTCCGACGAATTCCTCCGCGACGCCGTCATCAACTTCTTCAGTGCCGGCAAGGACACCACGTCCACCGCGATGGCATGGGTCCTATGGATTCTTGCATCCCGTCCGTCCATGAGGGAGAAGATCCGGGACGAGA	207	0	6.37e-18	Vc: CYP94N1v2	C-26 hydroxylation
111	root_contig_4013	GCACTATCAAATATCGAGTCGACAAACACAGATCTGGGTGAAGATGGCGAGAGTCTCGACCCTTGGATTTGGGAAACCTGCAAAAATTAACCTTGGGATGCCCCCTGACCCCCCTCCGGCATGAGAGACATGTTCAGCGCAGGGACGGAGACCACATCAATGTCATTGGTTTGGGCGATGTCGGAGCTAATGAGGCACCCGAAAGCGATGAGCGCCGCCCAAACCGAGGTACGGAAAAGAGCGAAAGGGAAGGACACGATCGAGGAGGGAGACATCGACGATCTTCGCTACGTGAAGCTCGTGATCAAGGAAAGCCTGAGGCTGCACCCTCCGGTCCCCTTGTTGGTCCCCAGGGTCTGTAGCGAGGATTGCGAGGTCGGCGGGTTCGACATCCCGAAG…	541	0	1.26e-17	Mt: CYP97B2	b-hydroxylation
112	stalk_contig_14714	GGGATCGAAGCAGCTCATCGGCGAAGGCTTGTTGATGGCCAACGGCGGCAACTGGTTCCACCAGCGCCACGTCGTGGCCCCCGCATTCATGGGGGAGAAGCTCAAGGGGCACATCAGGTACATGGTGGACTGCACCCTGCAGACCATCGGGTCGTTGCGATCCGCTGTCGGAACCGGGAACAACGTGGTGGAGATCGGGGAGTACCTCACTCGGCTCACCGGAGATATCATCTCGCGGACCGAGTTCGATACGAGCTACGAGAAGGGCCGGAAGATCTTCCACCTCCTCAACCGC	295	0	6.85e-17	At: CYP734A1. BAS1	C-26 hydroxylation
113	leaf_contig_45207	CGAGGACAGGAGCCAGAAGAACCAGGTCAGCGCCGACGACGTGGTCTCGCGTCCGGCGACGATGAAGCTCACGGCCATGTCGCGGAGGTCCTCGTCCGTGTTATCCGCGTCCGACGCGAACCGAGAGAGGAGGTCGTGGTGGTGCTGGTCTAGCGGAATCTTCTCCTTCCTCGACCGGATGATTTTCATCGCGAATTCGTCGACGACGGAGATTGATTCTCG	222	0	1.1e-16	Vc: CYP94N1v2	C-26 hydroxylation
114	leaf_contig_14184	GCATCAAATAAAAGGAAAGATAAGTACTTTCGATTGAGAAGTAATTAATTCTGACAAACCCTATTAGTGAGAGCCATGCTTCTAATTTGGGCCCATGTCAAGGATTGGTTTTCGCGTTGGATCGCCATTTGTTCGGCCTTGACAGTTTCGAGAAGCTTTTGGTCATCGTGGAGATACTTGATGATCCATGTAATCGCGCTCGCCGTTGTGTCCTGCCCGGCGAAGAGCACGCCGATGATGTTGTCGGCGATCTGATCGTCGGTGAGATACCCTCCTTCCTCGTCCCTTGACTCCATCAAGCGGCGTAATAGATCATTCGGAACATCCGCCGCTTGTAATTTCAGATCGGAAGAGCACACG	360	0	9.97e-16	Gg: CYP88D6	C-11 hydroxylation
115	stalk_contig_25324	GGGACGAGCCCTGCGTTTGCACCCGGTGGCCCCCCTTCTCGTCCCACGCCTCTGCCGCGAGGACTGCAAGGTCTCCGGGTACGACGTCCCTGCCGGGACGCGCGTCCTGGTCAGCACTTGGACCGTCGGCCGGGACCCGGCAATCTGGGACGAGCCCGAGGAGTTCAGGCCGGAGCGGTTCGTTGGGAGCGCGGTGGACGTGAAGGGGCAGCACTTCGAGCTGCAGCCGTTCGGGTCGGG	240	0	2.95e-15	Mt: CYP97B30	b-hydroxylation
116	stalk_contig_991	CTCCAAAAACCTCTCCGGCCTGAACTCCTCCGGACGCTCCCACCACTCGGGGTTATTTGCCAGCCACCACGCGTTCACCACCACCTTCGACCCCTTTGGCACCGTGTACCCCCCCAGCTTCGCCTCCTCTGAGTTCATGTGCGGCACCAGCAACGGGATCGGCGTGTGCAGCCTCAGCGACTCCTTCACCACCGCCTGCAGGTACGGAAGCCGGCCCAGGCTCGACTCGCTCACCGCCTCGCCGCCGAGCACGTCCTCCATCTCTCGCCGGAGCTTGTCCTGCACGCCGGGGTGGTTCGCTAGCTCGGCGATGGCCCACTCCATGGACCACAGCGTCGTCTCGATGGCCGCGACATTGATGTTCTCCACAATGTAGCTCACGTTATCGGCCGTGATCTC…	1354	0	5.17e-15	Sl: CYP734A7	C-26 hydroxylation
117	leaf_contig_46475	AGGGATACCACGGAGAGGAGGAGATTCCTCAGAGACATCGTCGTCAGCTTCATTCTCGCCGGCAAGGACTCCACCTCGTCGGCGTTGACGTGGTTCTTCTGGCTGATCTCGGCGAACCCCAGCTGCGAGCGGCGGATCTACGCCGGGCTACTCGCGCTCGGATCGGGGTGCGATGATGGAATCAAGGGGATGCAGTACCTCCACGCGGCGATATCGGAG	219	0	6.74e-15	At: CYP86A2. unspecific monooxygenase	C-16 hydroxylation
118	stalk_contig_3365	TGTAGGTCAAGATCGTTTGGTAGATGAATCAGACCTTCCCAAACTCACTTACCTAAGAAATGTCGTCCACGAGACGCTTCGATTGTACACTCCTGCTCCATTGTTATTACCACACTCAACTTCAGATGAGTGCATTATGTGAGAATACAAAGTTCCACGAGACACTATAGTATTGATCAATGCTTCGGCTATTCATAGGGACCCTGAAACATGGAGTGAAGCCACAACTTTCAAGCCTGAAAGGTTTGATAAAAAAGGAGAGTTGGAGAAGATGATTGCATTTGGGATGGGAAGAAGAGCATGTCCTGGAGAAGGCTTGGCTCTTAGAGCAATTAGCATGACTTTGGCATTATTGGTTCAATGCTTTGATTGGAAACGTATAAATGATGAAAAAATTGA…	678	0	8.36e-15	Mt: CYP97B17	b-hydroxylation
119	stalk_contig_26739	ACTTGATAGTGCAAAGAAATGTGAGAGTGGTGACAATTTCTTACCAAATTCCATCTCACGAGACAGATTCGTGATAGATAATTGCAAAAATATATTCTTTGCTGGATATGAGACTACTGCAATTACAACATCATGGTGCTTAATGTTGTTAGCTACACACCCAGATTGGCAAGATCGTCTTCGTGCTGAGGTGCTTAAATTTTGTGGAAATGATGGTAATAATATAGATGCAA	233	0	8.51e-15	At: CYP734A1. BAS1	C-26 hydroxylation
120	root_contig_1025	CCCGACACGTCGCTTTTCCGATCTGCGTTCACCACCACCTTCGACCCCTTTGGCACCGTGTACCCCCCCAGCTTCGCCTCCTCCGAGTTCATGTGCGGCACCAGCAACGGGATCGGCGTGTGCAGCCTCAGCGACTCCTTCACCACCGCCTGCAGGTACGGAAGCCGGCCCAGGCTCGACTCGCTCACCGCCTCGCCGCCGAGCACGTCCTCCAGCTCTCGCCGGAGCTTGTCCTGCACGCCGGGGTGGTTCGCTAGCTCGGCGATGGCCCACTCCATGGACCACAGCGTCGTCTCGATGGCCGCGACATTGATGTTCTCCACAATGTAGCTCACGTTATCGGCCGTGATCTCCCCCTTCAACTCTGCTTCGATTATGTGGTCCATCGCGCACTTTGGC…	1277	0	9.77e-15	Sl: CYP734A7	C-26 hydroxylation
121	stalk_contig_14731	CGAAGACTCGGGCCTTGGCTGGGATATCGTAGCCGTTAATCTGGCATTCTGTGATGCTCTCTCGGGGAATCGCAAAAGACCCTGCAGGGTGCATCCTTAGGATCTCTTTCACCACTAGGTTGAGGTAATGGAGATGGTGGAGGTCGCTCTCTTCCACCTTGCTCTTTGCTCCGATGACCGCAAGGATTTCTCCCTGAGCTTTCTTCATCACCTCCGGGTTCCTCATAAGCTCCGACATGCCCCAATCTAGGGTCACGCCGACGGTATCGGTGCCGCCAAGAAATATATCCATGAG	295	0	1.2e-14	Mt: CYP97B21	b-hydroxylation
122	root_contig_8479	GTGCTATTCGGATCTCTGATCGGTAACACCAGATCGATGGCTAGGGCACGTGCCGAGCTCATTGGCTCAATCAGTGGCGACGGAGATGAGTTGGATGAGCGGGTGATCGCACGGCTCCCGTACCTCCAAGCGGTGGTTAGGGAGACATTCCGGCTTCACCCGCCCGTTCCTTTTTTGCTGCCTCGTCGGGTTGAGACAGAGGTAGAGCTTTGCGGGTACACCTTACTGCCCAAAACCCGGGTGTTGGTTAACGTTTGGGCCATGGGCCGGGACGGCGATGTGTGGGAGGAACCGGATTCGTTCCTTCCGGAGAGGTTCCTCGGGAGCGGTGC	332	0	1.21e-14	Mt: CYP97B14	b-hydroxylation
123	root_contig_2574	CTCGCCGCCAACCAAAAACCTCTCGGGCCGGAACTCCATCGGCTCGGCCCAAACCTCGACATCCCTATGCATCTCCACCATCATGAAGTTCACCGACGTGTATTTCGGGATTACGTACCCCCCGATGCTCACATCCTCTGTCACCGTATGCGGAAGCAAGAAGTGGGCCGGCGCGTGCCTTCGCAAACCTTCCATCACCACCGACTTTAAATAGGGCATCCTCTGCAGATCCGCTTCCTTCACTTCCTCTGCCTCAGTCCCCACCACACTTCCTATTTCCTCGGACAACTTTTGTTGTATATCTTGATGCTTGACGAGCCTTGCCATAATCCATTGCAGCGCCGTCGCCGTCGTATCGGTCCCTCCGGCGAGGAACTCCGAGCAGAGGCTCACGATCTC…	733	9.33	3.77e-14	Mt: CYP97B1	b-hydroxylation
124	stalk_contig_6392	GGATTATGTCCCTCAGGTACCGATTATTCATAAGCTCCGGGTCTTCCTCGCTCGCTACTATGAACCGTGACAGTATATCATCTTTGCCATCTTCAGTCCCTCTCTTCATCTGTTTCCTCTTGCGTTCGATCAGTTGGAAAACGAAGTCATCGATGACTTTGATGTTCCTCTTGAGCTGGGCCTCCTGCCCGATGTTGAACCGCCGCTTGAGTTCCCAGAAAATGTCGGAGTATCGCCTGAAGACAATTTGGTTGGCGTCGTCGAACGCCTTGCTGAACCGGGACCCGGTCTCCTCAGAGCCAGAGAGGGTGTCGAGCTCCACTCCGAACCCCACCTTAAATATTGAATCCAAGGTTGATTTCATCAAGAGTTCCTGCAAACAAGAGGACACGGTTTTCT…	454	0	4.01e-14	At: CYP86A2. unspecific monooxygenase	C-16 hydroxylation
125	root_contig_21242	GTGCAGCAGCCAGAAGAACCACGTGAGCGCAACCGAGCTCGTATCCCTCCCGGCGAGGATGAAGCTGATGCAGAAGTCCTTCAGGAACTTGTTGGAAGTCTGGGTTGCGCTCATGAGCCGGGAAAGCAAGTCGCACCGCCTGGTCGGGACCGGTAGGTCCCCGATCTCAGCGCGACGGTCGGAAACCGTCCTGTCGAGATCGGAAGAGCACCG	213	0	1.48e-13	At: CYP86A2. unspecific monooxygenase	C-16 hydroxylation
126	root_contig_5823	ACGAGGCTCTTCCGATCTCCTTCCATTAATTGGATCTACGACACAACATACACACAAGTACGCAACGGACGATACACGGATCACATTTCATGTCCTTAGTTATTGAGCCGAGGTTTGGCGACAAGGATCAAGCTGGACTTCATGTGAGTTGTCAATCCATATGCTTCAGCCATGTTGAGTGCACCCCTTTCTAAAGATCCAGGCAATTCCCAATCAAAATGATGCAGCAGGTTGGCAAGTGCCAATTCAATTGTGCTGGTACTAAATCCAATCGCTGGGCAACCCCTACGTCCGGCCCCGAACGGTATCAACTCAAAGTCTTGCCCTCTGAAATCGACCGAACTGTTAACAAACCGTTCGGGCCAGAACTCCTCCGGCCTCTCCCACGTACTCGGATCC…	420	0	1.56e-12	Mt: CYP97B5	b-hydroxylation
127	leaf_contig_25531	TTTTCCGCCCTGACCCGAAGGGTATATATTTATATCCCTCCATAACTTCCTCTTCGAAAAACCGTTCTAGCTTGAAATTCGTAGGGTCCTTCCACAGGTTAGGGTCCCTTTGGACTGCGTAAGTGTTGAATAACAACATCGTGCCGCGTGGGATGTGGTACCCACCGACCGTGCAATCGGTGGAGGACTCATGGGGTGAGAGGGGGGCCGCTGGGAAGAGCCGAAGGGTCTCCTTGATGATGTTGTGGAGGTAGTTAAGGCGAGGGAGGTCGGCGAGATCGG	282	0	1.6e-12	Mt: CYP97B49	b-hydroxylation
128	root_contig_20419	GATCAAGCTGGACTTCATGTGAGTCGTCAATCCAGACGCTTCAGCCATGTCGAGTTCATCCCTTTCTAAAGATCCAGGCAGTTCCCATTCAAAATGTTGAAGCAGATTGGCAAGTGCCAATTCTATTGCATCCATCGCAAATCCAATCCCCGGGCAACCCCTACGCCCTGACCCGAACGGTATAAACTGGAAATCTTGCCCTCTGAAATCGACCGAA	217	0	2.65e-12	Mt: CYP97B3	b-hydroxylation
129	leaf_contig_34241	TTCAGTTTTTATTTAGTTGGTGACTCGTTTAGTCGAAGCTAACAAGTAGTATAATCATACTTAGCGGTAAAGGGAACCAATAAAAGAAATGGATAACCGATTTACCTTCCACCTCCTTGGATTGAAGGTGACTGTATCCTCGTAAATCTCGAGATTCAAGTGGACTGCTGGAGGGCAGACCATCACTCCCCATCCTGATGGAATTGTATATCCGGCGAGAAATGAAATTATTTTTGAATTCATAAAATCGGAA	253	0	2.78e-12	Ml: CYP87D16	C-16 hydroxylation
130	root_contig_2733	GAGGCGGAGCGTCTCCTTCACGACTGCTTCGAGGTAGGGGAGTTTGCGGATATCGGACTCGGATAGGTCCTTTCCGGGGTTGACGGCGGACGAGATCTCCGCCCGGGCCTTCAACATCGACTCTGGGTTGCGGAGTAGCTCAGCCATCGCCCACTCCACGGTGCTCGTGGTGGTGTCGCTACCCGCGAGGAACAGTTCCAACATCATGGATTGCATGGCGCGTCGGTCGAGCTCAATATCACTCTCACCGAGGTGACATTGGATGAGATAATCCAAAAAGTCACCGGCGGCACCACCGGCGACTACATGTCCCTTCACCTTCTGCTCTGCCTTTTTCTCATGCAATCGACGGTCGATCATCTCATCAAAGATTGCAAACAACTTCTCGAACATCTCCGC…	706	0	2.8e-12	Mt: CYP97B15	b-hydroxylation
131	stalk_contig_5946	CAGGAGGAGATCTTCCTCCCTCTGGTTAGAGCGGCGGCCAACGGATCGACTAACTACTCCTACGTCGAGTCCCTCCTCGGGCTCGAGATTCCGGAGGCTGACGGAGGTCGACGGAGGCTGACTGAGGTCGAGATCGTCTCGCTTTGCTCGGAGTTCCTCGCCGCGGGGTCCGACGCGACCGCGACGGCGCTGCAGTGGATCATGGCGAGGCTTGTGAAGCACCAGGAGATACAGCTGAAGCTGGTGGAGGAAATAGAAGGCGTGGTGGGCAAGAATAAGAAGGCGGGGGATGTGAAGGAGGAGGAGCTGCACAGGATGCCGTACTTGAAGGCGGTGGTGATGGAAGCGCTGCGTCTGCACCCGCCGGCCGACTTCGTGCTACCGCACGCGGCGACGACG…	474	0	8.46e-12	Gg: CYP88D6	C-11 hydroxylation
132	stalk_contig_8585	CTTGTCAACGTGTGGGCCATCGGGCGGGACCCGGACGTTTGGAAAGATGCGGATTCCTTCACCCCCGAGCGGTTTTCGGATATCGATGGTGGCATCGACTACAAAGGGCGCGATTTCGAGCTGATACCGTTCGGCGCCGGGCGGAGGATTTGCCCCGGGCTACTGCTTGGTGCGAGGATGATTCACATGATTTTGGCGTCGCTTCTGCGGTCGTTCGAGTGGAAGCTTCCGGACGGGATCGCGCCCGAGGATTTGGACATGGAGGATAAATTCGGGTTCACCTTGGGTAAGGCCGTTCCGCTTCGAGCCATCCCCGTTCTCGATGCCATGATATAGTCCAACATATATTGTTCCTGTTGAAGATCGTCAAGCATGCAAATAAAT	384	0	1.07e-11	St: CYP72A188. PGA2	C-22 hydroxylation
133	leaf_contig_11141	GTGGACTCCCTCCTCGCCCTCGAGCCGGCCGGCCGGCCCGGCCGCCTCGGCGAGGAGGAGCTGGTGACGTTATGCTCGGAGGTGATGAGCGCCGGGACCGACACCAGCGCCACCGCGCTCGAGTGGGCCCTCCTCCACCTCGTGCTCGACCCCGCCGCGCAAGCGAGACTCCACAAAGAGATCACCACCGTCGTCGCAGCACGAGGAGAGGAGGAGAAGAATAGGAAGAAGAAAATAACCGAAGCGGACGTGGAGAAGATGGGATTCCTGCAGGCGGTGGTGAAGGAGACTCTCCGGCGGCACCCGCCGAGCCACTTCGTGCTTTCGCACGCGGCGACCAAGGATACGGAGCTGGGGGGTTACCGCGTCCCGGCGGACGCGAGCGTGGAGTTCTACACG…	405	0	1.49e-11	At: CYP734A1. BAS1	C-26 hydroxylation
134	root_contig_20473	GTCGTTGGGAAAGGACCCGTCGCAGTGGACGGAGCCGTTGGAGTTCCGGCCGGAGAGGTTCTTGGAGGGAGCGGCGGTGGAGGCGTGGGGTCAGCACTTCCAGCTGCTTCCGTTCGGGACGGGGAGGAGGAGGTGCTCCGGGATGCCGCTGGCAATTAAGGTCATCCAGGTGGCGTTGGCGTCGATGGTGCAGTGCTTCGACTGGGAGGAGTGTGGG	217	0	1.72e-11	Mt: CYP97B12	b-hydroxylation
135	stalk_contig_5690	GAAAATAGGTTATAGATACTGGACATAGTTCATACCAACAGTAATTTACACAACGGCACGTGCCTGCATTTTCACTAGTATTACAACAACCGGCACTCAAGCTAACCCTTATTCCACTTATTACATATGATATTTTTTCACGAGTCATTGGTGACATCCGTATATCATGCGGTACTAATTATCGGAGTGGCTTTAAGAACAAGAGGAGTCCTCATATGAATTGCGAGCCCGTACGACTCGTCCATGTTCACATCATAGCCGCCTTCGGGCAACTCCCACTCGAAACTATACAGAAGATTTGCGAGAGCAAGCTCCACGCCGATGGCACCAAGAGTGAACCCGGGGCACATCCGACGCCCCGCACCAAAGGGCAAGAGCTCGAAGTGCTTCCCTTTGTAG…	486	0	3.34e-11	Gg: CYP88D6	C-11 hydroxylation
136	stalk_contig_34431	GGGCTCTCCCAGGGATTTGGATCGGGCTATCGCTTCTTGCTCTTTCACAACCTCATCACAGGTGACCGGATCCTTCCCGAGGTGCCGGATAATGAAGGTGATAAGAACCGACGTGGAGCCGTAGCCTCCGATCATGAGGATCATCGAATTGTCGGCGATCTCATCCTCGGTGAACCTGATCGATCCATCTTCTCCTCCCAAGCTCA	206	0	5.69e-11	Ac: CYP716A111	C-16 hydroxylation
137	leaf_contig_11305	GGATCGTACACTGCTTTATTATTTTTTTCGACCAGTTGGAAGCTGTCGCATACGGTGGATGCAGATTATTGGTAAACAAAAGCCTTCAATACGATATTGGCTTAGCCACAAGGCGAAGTGGATTTTTCTTGTGAACCGCAAGCCCGGGCAACTCATCCAAATCCAAATCATCCGGTTCCATTCCATCAGGCAATTCCCATTTGAAATTGTACACTAAGCTAGCCAAAGCGAGCTCAACCAATGCTATCGCAGACCGAACCCCGGGGCAGATCCTGCGTCCGATCCCGAATGGCACCATCTCGAAACCCGGGCTCGTGAAATCGATTTTGCTGCCCGAGAACCTCTCGGGTCGAAACTCTTTTGGGTTCTCCCAACATTCGGGATCCGTCGCTATTGCTG…	402	48.62	7.56e-11	Bf: CYP716Y1	C-16 hydroxylation
138	leaf_contig_34306	AGAGATGGACGTGCTCTACCGCTGCATCAAGGAGGCCCTACGGCTCCACCCTCCTCTCATAATGCTGCTCCGCCACTGCCACAGTGATTTCACCGTGAAAACCCGGGACGGCGTCGAGTACGACATCCCGAGGGGCCACATCGTGGCGACCTCGCCGGCTTTCGCGAACCGGCTCCCGCACGTCTTCACCGAGCCGGACAAATACGACCCCGACCGGTTTGCGGTCGGGAGGGAGGAGGACCAGGCGGCGGGG	253	0	1.66e-10	Plg: CYP716A141	C-16 hydroxylation
139	leaf_contig_1221	AAAGTCATTGCATACAAGAAAAATATCCTATCAGGTCTGTCGATGGATTCGTGGATCATCCTCACCATCATCAGCTTCCTCTCGCTGGGGATAAGCTTTCCACTGCTGAAACTCCTCGCTTCGCAGCCATCGAAGGGTAAGCTGCCGCCAGGTCCCCCCACCCTCCCCTTCATCGGAAGCGCGTTATGGCTGAACAAATCCCTCTTCGACATCGAGCCAATCCTCCGGACGCTCCGCGAGAAATTCGGCCCAATCGTCACCCTCCACGTGGGCTCCCGCCCCGTCGTCTTCATCACCGACCGCCGCCTCGCCCACCAAGCCCTCGTGCAGAAGGGCGCCGCCTTCGCCGACCGCCCGCCGCCGCTCCCCCACGACCGCCTCCTCGGCAGCAACCAGCAC…	1313	22.1	2.53e-10	Gg: CYP88D6	C-11 hydroxylation
140	stalk_contig_24869	GAATTTTATCCAGAGAGATTTATTAACAAGAAAATGAATTATCAAGGACATGAGCTTGAATCTATACCATTTGGTTCTGGTCGTAGACGCTGTCCTGGGAGTCAATTGGGTTTAGTTACTGTTAGATTGGTTTTAGCTCAATTAGTGCATTGCTTTAATTGGGAACTTCCACCTAACATTAGCCCTTCCAATTTGAATATGGAGGAGAAATTTGGAATCACTATTCCAAGGACCCACCACTT	242	0	3.3e-10	Sl: CYP734A7	C-26 hydroxylation
141	stalk_contig_20779	TTCCCGAAGCGACGGTCGTCCGATCTCTTGAAAGCAATGTGGCTATCGTCGAATCTCTCCGGTTTGAAATCCTCTGGATCGTTCCAGTACTCTGGGTCTCGGCCCATCGCCCACGCGTTTACTAAGACCCTGGTATTCGCGGGTACGTCGTATCCGTGGATCTCGCACGTCTCCCTGGACTCTCTTGGCAGCAGCAGTGGCGCAGGAGGGTGCAACCTCAGCGTTTCCTTGATGACTAGTTTAAGGTAGCGGAGTTTCTGGAT	263	0	3.67e-10	Gg: CYP88D6	C-11 hydroxylation
142	leaf_contig_17529	GGATACTTTGTATTAGAAGGGTCAAACAACAATTAATCCTTACATGTCACCAACACACAACACTAACATGCAAATTTCGCCCTTAAATCAACTAACATTTCTCTCTCCTTGGAATGATCCGAGCTCGGAGCGGATACTTCATGACCGTAGTGAACTCCGGCTTCTCGGCCATGTCCACCTCCTCCCCCTCCACCTTCTTCCACTCGAATCCCCTCACGAGGTTCGCCACGAAGTACTCGAGGTGGAGCATTGCGAGGCCGAGCCCCGGGCAAATCCTCCGCCCGACCCCGAACGGCATCATCTTGATCTCCCTGCTCCCCGTTATA	326	0	5.27e-10	Sl: CYP724B2	C-22 hydroxylation
143	stalk_contig_16905	TGACTTTTTGGATTATCTCATCCAATGTCACCTCGGTGAGAGTGAGATCGAGCTTGACCGACTCACCATACGATCCTTGATGTTGGAACTGTTCATCGCGGGCAGCGACACCGCCTCAAGCACAGTGGAGTGGGCGATGGCGGAGCTACTCCGCAAGCCAGAGTCGATGTTGAAGGCCCGGGCTGAGATCTTGTCCACCGTCGACCCCGGAAAGGACTTATCCGAGTCCGATGTCCTCGAACTGCCCTACCTCGAAGCGGTCGTGAAGGAGACGCTCCGCCTC	283	0	5.61e-10	Mt: CYP97B26	b-hydroxylation
144	stalk_contig_34554	GGTCAATTTCCTCTTGTGCACGCTTTAATGCATTCATATTATTCAACAATAGGACTAGGATCCATGTCATTGTCGTTGATGTTGTGTCTGACCCAGCAATCATAAGATTCACAATATTTGCCTTGATGATAGTATCACGGTCATTACCAGAATTAGGATCATCTTCAATCACAGAAAGCATCACATCAATAAGATCTTGTTTTTCA	206	0	7.28e-10	Gg: CYP88D6	C-11 hydroxylation
145	stalk_contig_33906	CTCGGGACGGAACTCCATCGGTTCGGCCCACACCTCGCTGTCCCTATTCATCTCCACCACCATGAAGTTCACCGACGCATTTTTCGGGATTACGTACCCCCCAATGCTCACCTCCTCCGTCACCGCGTGCGGAAGCACGAAGTGGGCTGGCGAGTGCCTTCGCAAACCTTCCATCACCACCGCCTTTAAATACAGCATCCTCTGCAGA	208	0	8.2e-10	Vc: CYP94N1v2	C-26 hydroxylation
146	root_contig_13759	AGTTCAGGAGTGGGCTCTTCCGATTGAGATATTGCCATCAACTTATACGCTTGCAACATGGACAAGAAGGATTGGAGGGATCCGGGTGTGTGGGACCCGGAGCGTTTCATGTCGAGCAGCAAGTACGAGCAGATGGACCTCTACAAGACAATGGCCTTTGGAGGGGGGAAGCGGGTGTGCGCCGGATCCCTTCAGGCGATGCTCATCTCTTGCGCGGCCATCGGGAGGCTCGTGCAGGAGTTCCAATGGAGGCTCAAAGAGGGAG	265	0	1.13e-09	Vc: cyp90B27	C-22 hydroxylation
147	leaf_contig_6135	GTCTCCTTCACGATGGCCTCGATGTAGGGGAGGCGGACAATGTCCCGCTCCTCGACCCAACGGCCGTCCCCGATGACGCGTTCGAGCTCCTCGGCAGCACGGGAGAAGATGTGGGGGTGCTTCAGGAGCTCCGAGATTGCCCATTCCACCGTCACCGCCGAGCTCTCTGTGCCGCCCGCAATCAAGTCCTGACTGAATGCCTTAACGCCGTCGCGGTGAAGTTTGACGTCGAGATCTGGTTCGTCGGCGAGCTGCAACAACACATCCACCATATCTCTCGCGACGAAGCCCTCACCTTCCCTCCGCCGCCTCTCGTCGTGCTCGTCGAGCACTGCCTCCATAAACCTGTCCAACTTGGGTGCCAGCGCCTTCATCCTCCTCACGTAACCCTGCAGGTCC…	550	0	1.17e-09	Gg: CYP88D6	C-11 hydroxylation
148	stalk_contig_27974	GGGACGGAACTCCATCGGCCCTTCCCACACCTCGCCGTCCCAATGCATTCCTGCCACCAAGAAATTTACCGTGGCGTCCTTCGGAATTATGTACCCTTCGATGTTCACCTCCTCGATCACCGCGTGCGGAAGCAATAAGTGGGCCGGAGCGTGCCGCCGCAGTCCTTCCAACACCACCGCCTTTAAATACGGCATCTTCTGCAAATCCTCTTCCTTCACTTCCTCCGC	228	0	3.51e-09	Gg: CYP88D6	C-11 hydroxylation
149	stalk_contig_4507	TTTCCCTGCACGATGCTCTGCCGAGTTTTCCTCCTTTACTGCCCCCGCGTTTTCCCCCACCGCGGCCTCGATCTCTTCCGCTAGCTTCTTCTGTATCTTTGGATGCTTCACGAGCTCCGCCATGATCCACTGCAGCGACGTCGAGGTAGTGTCGGTTCCGGCGTTGAGGAACTCCGAGCATAGGGTCACCGCCTCGTCATCGGTCAGCCGCCTTCCCCCTTCCTCGGGGATTCGAATCCCGAGGAGCGAATCCAGGTAAGAGAACACGTACCTCGACTGGGATTGACTGTGCTGTTCTCGGGATCTGATCAACGGGACGAAGAGCGCTGCCTGGCGGCGGCGGAGCTCCACCGCCGTACTCCACCGCTCCCGGAACAGAAACATCGAGATCCGCGGGAA…	565	0	3.95e-09	Gg: CYP88D6	C-11 hydroxylation
150	stalk_contig_9379	GGAGAAGTAAGTGATGTAAAATGTTTCCGTAAAGGAAGTTTTTTCGATCTCTCTGCCTCCTCCACCGGTGAACACCAAGAAGGGTATGACAACATAAAAAATATCAAACAATACTTACATGACACACAACAACAAGACGAAAATTTCTCCCTTATCAACTAACATTTCTCTCTCCTCGGAACGATCCGAGCTCGAAGCGGGTACTTCATGACCGTGGTGAACTCCCGCTTCTCGGCCATGTCCACCTCCTCCCCCTCCACCTTCTTCCACTCGAATCCCCTCACGAGGTTCGCCACGAAGTACTCGAGGTGGAGCATTGCGAGGCCGAGCCCCGGGCAAATCCTCCGCCCGACCCCGAACGGCATC	366	10.54	5.51e-09	Sl: CYP724B2	C-22 hydroxylation
151	leaf_contig_45093	TCGGGGGGTGAAGCCGGAAGGACTCCTTCACAACCGCCGTCAGGTTAGGGAGTTTTGAGACGTCAGACTCAGTCAGTATTCGCTCGTATCCGATCACACGGTCAAGCTCCTCTTCGACCTTCTCTTGCACCCTCGGGTTTTTTACCAGCTCGGCCATCGCCCATTCCACCGTAATGACGGTCGTGTCCATCCCTGCTGTGATCATGTCCCAGAGGAGTCCGA	222	0	8.02e-09	Mt: CYP97B44	b-hydroxylation
152	stalk_contig_31988	GGCACAACGTGCAAGTGAACATTTTTTTTTAAAATTATTCAATCTGGGTAACATTTTTTACTTTTCAACCATGGTTGATCCATTTTTCGGTCCAGGACTTGATTGCGGGCGGCACAGAGAGCTCGGCGGTGACGGTGGAATGGGCAATCTCGGAGCTCCTGAAGCACCCCCACATCTTCTCCCGTGCTGCCGAGGAGCTCGAACGCGTCATCGG	214	0	2.75e-08	Gg: CYP88D6	C-11 hydroxylation
153	leaf_contig_48266	GTTTTTGTACCAGAGAGGTTTTTGGATAGTGAAATTGATGTAAAAGGACATCATTTTGAACTTATTCCATTTGGATCTGGTAGAAGAATTTGTCCTGGTTTGCCTTTGGCTATTAGAATGTTGCCTTTGATGTTGGGATCTTTGGTTAATTGCTTTGATTGGAAACTTGAAGATGGATTGAATGTTGATGATTTGAATAAAGAAGATGAATATGG	215	0	4.06e-08	Sl: CYP724B2	C-22 hydroxylation
154	stalk_contig_26780	AACCAAGTTCGCAACAAAGTACTCGAGGTGGAGCACGGCGAGCCCGAGCCCTGGGCAAATCCTCCTCCCGACCCCGAACGGCATCATCTTTATCTCCCGACTACCCGATACATCCACCCCCTCCCCTTCGCCGCCAGCCGTAAACCGCTCCGGCCGGAACTCCATCGGCTCCTCCCACACCTCCCCGTCCCAATTCATCTCCGCCACCATGAAATTCACCGACGCCCCCTTCG	233	0	6.21e-08	Gg: CYP88D6	C-11 hydroxylation
155	stalk_contig_7750	TTGCGCGCCTGGCGCCAGTAGGGGCCGTAGGGGGACCAGGGGATGTCGGCGTAGTTGTAGGCGGTGTGCTTGCCGGCCGCGGTTTTTGGGCGGTCCACGAAGGTGAGGTCGTGGGTTTTGAGGACGATTTTCGCGGTTTCGACGGAGGCCGCGACGAGGACGGGAAAGGACCCGAAGCGGAGGTAGGTGAGGGGGCCGTACTTGAGGGAGAGGTCGTGGAGGGAGCGGTGGGGGAGGGGGCCGATTAGATCGAGGTTTCCGATTATGGGCCACGGTTTCGGGCCCGGCGGGAGATTTAGGTGAGCACGCCGATGTCGGTGGCGGGTATAGAGAGATTTGAGGAGGAAGAGGACGAGTGCTGTGGCTATAAACATTGAGTACTCCATTGCCTCGCTCTTT…	407	0	6.78e-08	Gg: CYP88D6	C-11 hydroxylation
156	root_contig_10491	GCGGCTTGGACGCAAGAGTGAGGAGGTGCTTTATTGAATTTGATACAGTTATTAACAAGATATTAGAGGATCACCAGCTCCTTCGTGTTAACAACTATCAAAGGCTTGAAGATGACAGCCACCAAGACTTTGTTGATGTTCTTCTGTCACTAGAAGAAGCTAATGATGTTGATAAGGTCGGCATCTTACTCGAAAGAAACAGCATCAAAGCCCTCCTTATGGATGTTTTTACTGCTGGGACAGATACCAGCTTTGCGGTACTGGAATGGACAATGGCGGAGCTCATTAGGCACCCA	296	0	1.38e-07	Gg: CYP88D6	C-11 hydroxylation
157	root_contig_10029	GGCGAGGTCCGACTCGTCGACCATCCGCCGTGGGCCCACGTTGGCGTCGATCTCGGCCGTTAATCTCTTCAGGGATTGAGGGTTGTTGAGGAGCAGCGACATCGCCCATTCGATCGTCACCGCTGACGTGTCCGTACCCGCCGACAGCAAAGACGATATGAGGCCTTTAATAATGTCGTCTGTGTAGTACTCGGGTTCGGTGTCCTGCAGGGACAGCAGAACATCGATCACCGCCGCTCCTCCACCGCCGGACTGCCGCTCCCGGCGGTGCTTATCGACCAAGCCCTGCCAGTACTCGTCCG	302	0	1.4e-07	Mt: CYP97B4	b-hydroxylation
158	leaf_contig_48658	GCCAGGGACCGGTTCGACCGGATATTCGAGGCGATCATCAAGCAGCGCACAAAAAAGAACGACGGCGACCGCGACGAAGAGGATTTTCTTCAGTTCTTGCTGAAAATGGAGGCAGGAGGTGGTGACCCCGAGACGCCTTTCACCATGGACCATGTCAAAGCACTTCTAATGGACTTGGTGATAGGAGGGACGGACACTATGTCGAACACTCTGGA	215	0	1.64e-07	Sl: CYP724B2	C-22 hydroxylation
159	leaf_contig_14114	CCCTACCAGTATGATGCAAACAGGGTATACTTGAATTTGATCGCATAACATAACTTGCTTTAATTCAACAAAGTACATAGTCTCCAATCTCGCCGTCCTTATGTACGATTGAACCTAAACGACCGGAGCTACAGCTCTCCTCGGAACTATCCGGGCCCGGAGCGGATTCCTCATCACGACAGTGAACTGGGGCTTCTCCGACATGTCCACCTCCTCCCCGTCCACCGCCGGCTTCCACTCAAACTCCCTAACCAAGTTCGCAACAAAGTACTCGAGGTGGAGCACGGCGAGCCCGAGCCCTGGGCAAATCCTCCTCCCGACCCCGAACAGATCGGACGACCACACCTCTGAACTCCACTCA	361	0	3.61e-07	Os: CYP724B	C-22 hydroxylation
160	stalk_contig_33748	AAACATGGATGACTACTCTCGTTTTACTTGGAATCCGGTATTCCTGAATCCGGGTTTCCTCCATGGACTCCCGAGGGACCAGAAATGGTCCGGTCGGGTGGAGCCTCAGGGACTCCTTCATAACGGCTCTCAAGTAGCTCATCTCGATCAAATCCTCCTCTCTAATCATTTTTCTCGAAGAACCCACAATCTTTCGAATCTCTTCCCG	208	0	6.05e-07	Vc: CYP94N1v2	C-26 hydroxylation
161	stalk_contig_4486	CTTCAATGTGGCGGACTTCATACCGTGGGCGGGTCGGTTCGATCTCCAAGGGATAAGGAAGGAGATGGAGGGGGTTAAGGCGGTGACCGACCGGTTTCTCGACAAGATCATTGATTCGAGGGTGAAGGCCGCCGCAGAGGGGACGGCGGCGAGGGACTTCATCGACGTTCTGGTGTCACACATGGGCGCGAACCTCAACGGCGATAAGTTGCAGTTTGGACGGGACAACGTAAAGGCGCTCACCATGGAGACAATCGTTGCCACCGTCGAACCGGTTGCGACGGTAACGGAGTGGGCCCTCTCGGAGCTCCTGAAGCACAAGGAGATAATGATGAGGGCCCAGGAAGAAATCGACACCGTCGTCGGGAAAGATCGAACGACGGCGGTGGCGGAGTCCGA…	566	0	1.42e-06	Sl: CYP88B1. GAME4	C-26 hydroxylation
162	leaf_contig_7223	CTTCCTTCACTTCCTCCGCCTCGGACCCCACCGCGCCTTCAATTTCCACCGCTAATTTTCGCTGAATCTCCTGATGCTTCACGAGGTTCGCCACGATCCACTGCAGCGCGGTCGCCGTTGTGTCGGTCCCGGCAGTGAGGAACTCGGAGCAGAGGCTGACGATCTCGTCCTCCGTCAGCCGTCTCCCCCCTTCTTCGGGGAGCTGGATATCGAGGAGGGAATCCAAGTAGGAGTACACGTACCTCTCCTCGCTCAGCTGCTGCTGTTTCTGCGGCGGGGATCGCTTGTGCTCCTGCCGGGCTCGGATCAACGGGATGTAAAGCTCCGTCTGGCGACGCCGGTGCTCGATCGCCTCCCGCATCCGCTTCTGGAATATGTACTTTGAGATTTTGGGGAGGA…	503	0	1.64e-06	Gg: CYP88D6	C-11 hydroxylation
163	stalk_contig_3387	GTCCGTTGTAAGGCCAAGACCTCTCCGACCACCGCAGACTCGAGCTTCTCCCCGAAGCACATGAAGACGAGGAGGCTGAACATGGCGTAGTAGAAGCAGTCCAGGACTACTACCACCTTGTTTCCGGCGGTGTCCCCATCAATAATCCCAGCTTGTTCCCTGAGGCGGTCGAACAGTTGGGCAAGGGCCCACGAGCGGTCTCCGGCGAAAAGCCGGATCCTGGCTGGGCTTAGCATATCTCCGGCGAGGTTACGGCGGAGGATTCTCCAGAGGGGCCCATAACCCACGGAGGTGATGTTATGTTGGTTGCTGCCGAGGAGGCGGTCGTGGGGGAGCGGCGGCGGTCGGTCGGCGAAGATGGCGCCCTTCTGGACGAGGGCTTCGTGGGCGAGGCGGCGG…	675	0	2.64e-06	Sg: CYP87D18	C-11 hydroxylation
164	stalk_contig_11108	TCCCTACACGAGGGTCTGCCGATCGGGGCGGGGGACGGTGGGGACGTCGCGGTTGGCGAAGGCGGCGTCGTGGTCGCGGAGGACCTCGCGGGCGAGGGCGGGGGAGGAGACAACGACGCCGAGCTTGGCGCCGAGGCGGAGGCGGAAGATGGGGCCGTGGACGGCGGCAAGGCGGGCGAAGTAGGCGTGGAGGTCGGGGGCGAGGAACGGGAGGTTGCCGACGATGGGGAGCCCGGCGGGGCCCGGGAGGGGGGGAGGGGATTGGTGGCTCTGACGCCGACGGAGGACTAGGACGGCATACCATAGGGCCGCCAGGAGAGCGGCGGCCGAGTAAAG	336	0	8.25e-06	Mt: CYP97B18	b-hydroxylation
165	stalk_contig_33418	TTCAATTGTTTCATTTTTGCCGATTTCTCTACATAACTCTTTTCTTGCTTCTGTTAATTTGTCAGGCTTGCGTAGTAGCTCTGCCATAATCCATTCAATTATGCTTGATGTTGTGTCAATCCCAGCAACAAATAAATCCAGAAATAGATGCACCATCTCATTGCGGCTCAATTCAGAAGTTGTTTCTCCACTATTGTTGCTATTAAGAA	209	0	1.48e-05	Mt: CYP97B23	b-hydroxylation
166	stalk_contig_5396	GCGGTTGTTGGGGGGAAGGGGAACTTCAGGTTTGTTCCGTTCGGGGTGGGACGCAGGAGCTGCCCCGGGATCGTGCTGGCTTTGCCAATCCTCGGGCTCATTGTGGGAAAACTGGTGGAAAACTTTGAGCTGAGGCCGCCGGTGGGATTGGAGAAGGTGGACGTGAAGGAGAAAGGCGGGCAGTTCAGCCTGCACATCGCCGAGCACTCGGTGGTGGCATTCCGACCGGTGGCTAAAAGCAAATGAATGAATGAATTCAACCTTCAATTATTCGAATAGTAAAATATGTTGTTTATGTAATACAAAATGTAATAAAGGAATTCAACCTTCAGTTATTTGAATAGTAAAAGTTGTTTATGTAATACAGAATGTAATAAAAGATGATACCCTGGGTGGAGC…	503	7.2	3.28e-05	Pg: CYP716A47. PPDS-2	C-12 hydroxylation
167	stalk_contig_3848	GAAAGATTTGACCCGCTTCGCGCTAAGTAATTCGAGGACGCAGATTTTCCGAAGTTGCCTCCAGAAATCGCCGTAGGGGGCGAAGACGAGGCTCGTGCCCCCGTACGACATGATGTTGTTGGCGGAGAGTATAGCGCGGGAGGAGAAGGTGAGGTCGTGGCCCTTCACGATCTCGCGAACCGCCTCGGCGGAGGATACCACTATGGTGGAGACTTCGCCGAGCTTTAGGTGCATGATCGGACCGTGGGCCCTTGCGAGGTCCCTCAGTCGGCGATGGGGCACCGAGCCCGCCATGTGGTGGATGTTACCAATGACGGGCAGCTGCCGGGGACCCGGCGGGAGTCTAAATTTACGGCCCCGCCGGTGGGAGGAGGATTTGACTGCGAGCTTGAAGACGAC…	625	0	4.09e-05	Vc: cyp90B27	C-22 hydroxylation
168	root_contig_7017	GTGGACGGCGCACACCTTGCGCAGGGCGCGCCACCGGGGCCCGTAGGGTGCGAAGACGAGGTCCCGGTAGTTGTAGGCGACGTGCTCCGCGCCGGAGTTCGGCGGGCGGTTGCAGAAGTTTCCGTCGTGGGTGCGGAGGAACTCCTCGGCGGCGGCGGCGGAGGACGCCACCACCGCCTCGACGGACCCGAGTCGGAGGCGGAGGATTGGGCCGTGGATCTTGGCCATCGCGTGGAGGGTGTGGTGGGGCCTGGTGCCCAGCTGGAGCAGGTTCCCCACCACCGGCCACCCCCTCGGCCCCGGCGGCAGATCGCCGGATTTCCTCCGCCCGCCGCCGGAGAGGTAGCGGAGGAGGAGCGCCGCGAAGAGTGTGA	374	0	5.83e-05	Gg: CYP88D6	C-11 hydroxylation
169	root_contig_18980	GTGTACTCTTACGTCGACTCGCTGCTCGACATTCGGCTCCCCGAAGAAGGGGGGAGGCAGCTGACGGAAGACGAGATCGTCAGCCTCTGCTCCGAGTTCCTCACTGCCGGGACCGACACAACGGCGACCGCGCTGCAGTGGATCGTGGCGAACCTCGTGAAGCATCAGGAGATTCAGCGAAAATTAGCGGTGGAAATTGAAGGCGCGGTGGGGTCAGAGGCGGAG	225	0	6.45e-05	Gg: CYP88D6	C-11 hydroxylation
170	stalk_contig_3247	GTCCGTTGTAAGGCCAAGACCTCTCCGACCACCGCAGACTCGAGCTTCTCCCCGAAGCACATGAAGACGAGGAGGCTGAACATGGCGTAGTAGAAGCAGTCCAGGACTACTACCACCTTGTTTCCGGCGGTGTCCCCATCAATAATCCCAGCTTGTTCCCTGAGGCGGTCGAACAGTTGGGCAAGGGCCCACGAGCGGTCTCCGGCGAAAAGCCGGATCCTGGCTGGGCTTAGCATATCTCCGGCGAGGTTACGGCGGAGGATTCTCCAGAGGGGCCCATAACCCACGGAGGTGATGTTATGTTGGTTGCTGCCGAGGAGGCGGTCGTGGGGGAGCGGCGGCGGTCGGTCGGCGAAGATGGCGCCCTTCTGGACGAGGGCTTCGTGGGCGAGGCGGCGG…	694	0	7.77e-05	Sg: CYP87D18	C-11 hydroxylation
171	leaf_contig_2064	GTTTCCGATCATCGGCCACCTCCATCTCTTAAGGAAGCCCCTCCTCCACATCTCGCTCGGTCGGCTCTCCGCCCGGTACGGCCCCGTCCTCCTGCTCAAACTCGGTTCCCGCCGCGTCCTCGTCGTGAACTCCGTCGCCGCCGCCGAGGAGTGCTTCACGAAGAACGACGTGGCCTTTGCAAACCGGCCCCGCCTCCTCGCCGGCGAGCACCTCGGATACGGCTACACCTCCGTCGCATGGGCCCCGTACGGGACCCACTGGCGCAACCTCCGCCGTTTCACCACCCTCGAGGTCTTCTCCTCCACCCGGGTCAACGCCTCCTCCGACCTCCGCTCCGGCGAGGTCCGGGCACTCGTCGGCACGCTCTTTAAAGACCACCAGGCGGCGACCGGGCAAAA…	1030	22.66	7.8e-05	Sl: CYP88B1. GAME4	C-26 hydroxylation
172	stalk_contig_2602	ACCGGTGATCGCCGGAACCCACCCCAACCACGGAAAAAAATCTGCGACACAGAAACAAGCCACGAGAGCCTGAGTCTCTGCCAAAATCTTCCATAATCCGCCCCGGTCGCGGTCGTACTTTTTCCCCAGCGCGATCCGGCATGTAACGTCGTTCGCCAGCGAGAGCATCAATTGGCTCAAGTCGACGGTTTGATAGAGACCAGGACGWCTCGACGCATTTTGAGGCTTGTCAATGTTGTGATATGGATGAACCGGCGGCGGGTCATTGACAATCGATGACACCATAGAGGCCACCTCCTCCTCCCTCGCCGCGCGAAAGGACTCCACGCGCTTCGAGCTGAAGAGCTTCATGGTGCATATCTTGCGCGCCTCCCGCCAGTACTGGCCGTAGGGTGCGAA…	797	0	0.000157	St: CYP72A188. PGA2	C-22 hydroxylation
173	root_contig_1583	CTCAGACCTGAGCTCTTCTTCTCAAAGGAAAACAATGGCTGCTCCTCTACTCTTGATCTACTTCCTTCTCCTCCTTATCCCACTCCTCACCGTGTGCCTCCATCTCAAAGCGACGCTAATTTCGGGACGTTCGAGGCTCCCGCCCGGTCCCCGGCCCCTCCCTATCATCGGCAGCCTCCACCTCCTCGGCGACCTCCCCCACCGCTCCCTCCGCCGCCTCGCCGACATCCACGGCCCCATCATGCACCTCCGCCTCGGCAGCGTCCCAACCATCGTTGCTTCCTCCGCTGCCGCCGCCGCTCAGTTCCTCAAGACCCACGACCTCTCCTTCTGCGACCGCCCGCCCATCGTCGCCTTGCAGAAGTTCTCGTACGGCGGCGTCGACATCGCCTCCTCCAA…	1002	0	0.000158	Sl: CYP734A7	C-26 hydroxylation
174	root_contig_18897	GGAGGCTAGCAAGCGTGAGCTCAACCGATCGCAAGTCCGAACGCCATCCTGGGAAAAATCCTTCTCCTGGATCCGAAAGGCAAGTACTCAAAGTTTTTCTTTTCAAATTGATTGAACTCCCGCGAAACCTCTCGGTCTTGAAAGCCTCTGCGTCGTCCCAGAATCTGGGATTCCTCCCTAGTGCCCACACGTTGAGGACACTCTGCTCAGATCGGAAGAGCACAC	225	0	0.000188	Mt: CYP97B10	b-hydroxylation
175	root_contig_7172	TCCTACTCCTTTCCATTGCTTTCTTTTTCACCAGCTTCCTTAGCATACTAATTCCAGTTATCAAGCTAAAAGCAATGAGGCCACCGCGGACCCCGGACCGGGAACAAACCCGACTCCCTCCGGGCCCACGGAATTTCCCGATCATAGGGAGCATGCACCGCCTCCTCCTCGGCTCCCAGCTCCCTCACCACTGGCTCTGCGTCCTCGCGCGGGAGCACGGACCCCTGATGCACCTCAAGCTTGGCCAGGTCGGCTTCGTGGTGGCCACCTCGCGTGAGGCCGCGGAGGAGATCACAAAGACCCACGATCTCAACTTCGCGTACCGCCCCACGCTCGCCGGCCCTAGGGCCCTGTTCTACGACTTCTCCG	369	0	0.000202	At: CYP86A2. unspecific monooxygenase	C-16 hydroxylation
176	stalk_contig_1791	GCTTCTTTTTCAATGTGAGAGAGAGAGACTAAAATAATTCCAGGAAGACGTCGACTAACCATCATAATCCCCTTGATTTGATTTGTTGTAAGTGGCACACCATCCTTCTGTAGTCGAAGTAGAGTAGTGCAGAAATCACTAAGCTCTCCTTCTACAAAACTCTTAGCTGCAAGTGTTGCATGAGCTTCAACCTCCTCCTCCAAGAACTCATCCATGATCCTGAAGTTCCGATCGAGCTTCGCTCCCCACCTGCTGAAGTACCGGTCGACCCACTCCATCCCGGGGAAAAAATCCCCGACCGAGAACCCGCCCATCAAATATATCACCTCCACGATCAAATCCTGATACTTGCTCCTCCCACAACCCCCGTCCTCCGACATCCGCCGACCGAAAATCTCT…	1002	0	0.000267	Sl: CYP734A7	C-26 hydroxylation
177	root_contig_6211	TAAAAAAAAATAAAAGAAAAAAAGAGGATTTGAGAACTGCGCGGGGTCACGCATCGCCAGCGGCTGGTACCCGCACAGCAGCTCCCCCTTCTCCACCCTATAGCTTGAATCGTGGGAGCTGAGCACGAATCCGTCTCTCGCCCTTCCGTACTGCAACGGCACCGGGGGGTTCCACCGCAGCGCCTCGTACACCGTCGACCGGACCAGTTCCATTTCTCGCTCCGTGTCGAAGCCGAGGCGCCGGCCGCCGCCGAGTACTCGGCGTACCTCGGCTTTTAATTTCCCCCTGAGGGCAGAATTGTCCTTTTCGCCCAGTTTTGCGAGGAGGGAGGGGAGGAAGACGGAGAAGCCCCCGAAGGCGTTGAATCCCAATACGAAGAGGATGTTATGGATTGCGGC…	402	0	0.000362	Vc: CYP94N1v2	C-26 hydroxylation
178	stalk_contig_3584	TAAAAAAAAATAAAAGAAAAAAAGAGGATTTGAGAACTGCGCGGGGTCACGCATCGCCAGCGGCTGGTACCCGCACAGCAGCTCCCCCTTCTCCACCCTATAGCTTGAATCGTGGGAGCTGAGCACGAATCCGTCTCTCGCCCTTCCGTACTGCAACGGCACCGGGGGGTTCCACCGCAGCGCCTCGTACACCGTCGACCGGACCAGTTCCATTTCTCGCTCCGTGKCGAAGCCGAGGCGCCGGCCGCCGCCGAGTACTCGGCGTACCTCGGCTTTTAATTTCCCCCTGAGGGCAGAATTGTCCTTTTCGCCCAGTTTTGCGAGGAGGGAGGGGAGGAAGACGGAGAAGCCCCCGAAGGCGTTGAATCCCAATACGAAGAGGATGTTATGGATTGCGGC…	653	0	0.000936	Vc: CYP94N1v2	C-26 hydroxylation
179	root_contig_11830	GCGGTGGAGGCGGGGGAGGAGACAACGACGGTGGGGACGCGGCCGAGGCGGAGGTGGAGGACGGGGCCGTGGGCGCGGGCAAGGTCGCGGAGGATGCGGTGGGGCGGCGAGCGGCGAAAGATGAGGTGGTGGATGTTTCCGATAACGGGTAGGGTTCGTGGGCCCGGGGGGAGCTTATGGGTCCCCGGTCCTAGGGTGGATTTTTTACCGAGGAGGAGGACGAAGACGAAGAGGAAGACGAAGGAGAGGGTAATGGTAATGGGTTCCATGATTGAGAATTGGA	283	0	0.00196	Gg: CYP88D6	C-11 hydroxylation
180	stalk_contig_31077	CCCGAGCCGGACAGACATGAGGGGCCCGTATGTCTTGGCGAGCCTGGCGAGGGAGTGGTGGGGCATGTCGCCGATGATCGGGAGGTTCCCGATTATCGGGAACGGGCTTGGACCCGGTGGGAGCAGGCCGTACCGCCTAGAATTTAGGCATTTCTTAAAGAGGAGGAAGACGACTGCGATGACGAAGTACAGAAGCCATTGGGGGAGTAGTGGTAGC	217	0	0.00244	Ml: CYP87D16	C-16 hydroxylation
181	stalk_contig_25369	GTGGCGTTGAGCAAGTCGTTCATGATAAGCTTTCTAATAAACTTCCAGTAAGGTCCAAAGGGAACCATAGCAACAGAATTGTCATAGGTAAGACGGCTAATAGCAGAGGTTTGGAACCTTGTGTTAAAAGAAGTAACTTCATGTGTTTGAAGGAAGAGTTTGAAGAGATCAGGGGTGGAAGCAACAACTGTAGGCATGGAGCCAAAGTAAAGAGAATACAAAGGACCATAACGTTCTCCA	240	0	0.00279	Vc: cyp90B27	C-22 hydroxylation
182	root_contig_3415	CGTCGGATGAAGTGTCCGTTCCTGCCGACAACAAACTGACTATGAGTGCCTTGATGACAACGTCGGTGTAGTACTCTGGGTCGGAGTTCTGCAAGGACAACAGAACTCCGATCACCGTCTTCTCATCCTTATCCTTGTCTGCCTTTCTCCTATGCTCATCGATAAGCCCCTGCAAAAATTGATCCCTCGAGCTCTGCAGACTAGACAACCTCTTCTTCACCCCATCGAGGTTGAGCCACCTCATCAACGGTACAAAGTCCCGAATATTTGACGACGCCGCGAGCTTGGACGTCTCCGCCACCATCCCTTGGAACCTCCTCGCTTCCCCGTCACCCCCCTTGGCATCATTGTCATAGTACCGTTTCCCCGCCACCATGGTCATGATCACGTTCAGAGAAA…	607	10.48	0.00319	Vc: CYP94N1v2	C-26 hydroxylation
183	leaf_contig_28050	GATTCACAGAAGCAATGGAAGCATGGGCTCTCATTTTGCTTTCCCTCTCCTTCTGTGCCGCTCTCGTCGTCCTCGGCAACTCATTCAATAATCGGCGGCGGCAGCGGCTCCCGCCGGGCCCGCTGGCGGTCCCGGTCCTCGGAAACCTCATGTGGCTCCGCCACTCATTTCGGAACATCGAGCCGCTCCTCCGCGAGCTCCACCTCAAGTACGGCCCCATCCTCACCGTCCGCATCGGCTCCCGCCCTATCATCTTCATCTCCGACCGCCGCCT	274	0	0.00553	Sg: CYP87D18	C-11 hydroxylation
184	leaf_contig_26547	GTCGTCGGCAACCTCTTCCAGGTGATCCTCCAGCGCCGCCCCTTCATGTACGTCGTCCGCGACCTCCGGACCCGCTACGGCCCGATCTTCACCATGCGCATGGGCCAGCGCACCCTCATCATCGTCACCAGCTCCGACCTCATCCACGAGGCCCTCGTCCAGAAGGGCCCACTCTTCGCCAGCCGGCCCGCGGACTCGCCCACCCGCCTGCTCTTCAGCGCGGGAAAGTGCACCGTCAACTCCGCCGCCTACGGCCCCCTCTGGCGCCTCCTCCGCCGC	279	0	0.00622	Sg: CYP87D18	C-11 hydroxylation
185	stalk_contig_10253	GGGGGCGAATACGATGTCGGAAAAGTCGTATAACAGGGCCCTAGGGCAGGCGAGTGCTGGGCGGTACGCGAAGTTGAGGTCGTGGGTCTTTGTGATCTCCTCCGCGGCCTCACGCGAGGTGGCCACCACGAAGCCGACCTGGCCAAGCTTGAGGTGCATCAGGGGTCCGTGCTCCCGCGCGAGGGCTCGGAGCGAGTGGTGAGGGAGGGAGCCGTGGAGGCGGTGCATGCTTCCGATAATCGGGAAATTCCTTGGCCCCGGTGGGAGTCGGGTTTGTTCCCGGCCCGGGGACCGCAGTGGCCTCATTGCTTTTAGTCTGATAACCTGAATGAGAATGCCTAGGAAGATG	349	0	0.00748	Ac: CYP716A111	C-16 hydroxylation
186	leaf_contig_22300	GTTGTGGGTGTTTTTTTTTTTTTGCTTGGCGGGGGTTTTTCGGATGTCGTTCGCCGGAATCGCTGCAAAATACGGTCCCATTCTTCGCCTCCGCTTCGGTTCCCGCCCAGTCCTCCTCCTCTCCTCCCCGGACTACGCCGAGGAATGCTTTGGAAAGAACGACGTCATCTTCGCCAACCGCCCTTCCCTCATGTGGACCAACTACCTCTCCTACAACGGTACCGTCCTACCCTCCGCCCCGTACGGACCACACTGGCGAAACCTCCGTCGAATCATCGCCCTCCACGTCCTCTCC	295	0	0.00955	Vc: cyp90B27	C-22 hydroxylation
187	leaf_contig_13685	ACGGGCTCGCCTTCGCCGACCGCCCCGTCTCCAAAGCCATCCATCGCATCACCTACGGCGCCAACGACTTCTCCTTCGCACCCTACGGCCCCTACTGGCGATTCATGAAGAACCTCTGCATGTCCCAGCTCCTCGGCGGCCCCACCCTCAACCACCTCCTCCCCGTCCGCCGTGATGAACGGTCCAGATTCCTTCGTACTTTACAGGAAAAGGCAAAGGCGGTGGAGGCCGTCGACATGGGTAAAGAGCTAACGAAGCTCACCAACAACGTGATCTCAAGAATGGCGATGGGGCGGAGGTGCTCCGAGACCGACGGAGAGGCGGAGGACGTGAGGCAAGATCGGAAGACCGTCTGCAAAAATAAAAA	367	0	0.01	Sl: CYP72A186. GAME7	C-22 hydroxylation
188	leaf_contig_24768	AAGAGTCGGCGTACGAGCTCCTGTTCCACCGCGCGATGGGGTTCGCGCCGTCCGGCGAGTACTGGCGCCGCCTCCGTCGAATCTCCGCCGCCCATTTGTTCAGCCCGAGGCGGGTCGCCAGTCTCGGCGGTACCCGTTCCTCGATCGGCGAGGAAATGGTCCGAGACGTGGAGCGCTCGGTGAACGAGGATCACGCGGTGGAGTTGAGGAGGGTGCTGCATTTCGGGTCGTTGAACAACGTGATGATGAGCGTTTTCGGGGAGAGGTACGATTTCGGGTCGGAAA	285	0	0.01	Os: CYP734A1	C-26 hydroxylation
189	leaf_contig_49602	GCGGTACGGCCCGCTCCCACCGGGTCCATGCCCGCTCCCGATAATCGGGAACCTCCCGGTCATCGGCGACATGCCCCACCGCTCTCTCGCCAGGCTCGCCAAGACTTACGGGCCCCTCATGTCGGTCCGGCTTGGGGCCGTCACCACCGTCGTCGTCTCCTCACCTGGCGTCGCCCGCGAGGTCCTCAAAAACCGCGACCAGGACTTCTGCGG	213	0	0.01	Mt: CYP97B41	b-hydroxylation
190	root_contig_5540	GCGGTACGGCCCGCTCCCACCGGGTCCACGCCCGCTCCCGATAATCGGAAACCTCCTGATTATCGGCGACATGCCCCACCGCTCCCTCGCCAGGCTCGCCAAGACCTACGGTCCCCTCATGTCTGTCCGGCTCGGGGCCGTCACCACCGTCGTCGTCTCCTCCCCCGACGTCGCCCGCGAGGTCCTCAAAACGCGCGATCAGGACTTCTGCGGCCGCTCGCCCCCTGACGCTGTGTGGGCCCTCGGCCACATAAAGTACTCGTTAGCCTTCGGCCAGGTGGATCAGTGCTGGCGCAACCTCCGGAAGGTCTGCAGCACACAGCTGTTCGCTTCGCGGAGGCTCGACGACCGGCGGGGGCTGAGGGAGTCGAAGGCGCGGACCTTGGTGGAGTACGTGCG…	434	0	0.02	Vc: CYP94N1v2	C-26 hydroxylation
191	stalk_contig_5916	GCTCGATAAAAGGTTGAGCGACGTCGCGAACGCTGCCCTCCCGATATCCACCGCATCCCCGGCCTTGCACCGGGCGCGCACATACTCCACCAAGCTCCGCGCCTTCGACTCCCTCAACCCCCGCCGGTCGTCGACCCGCCGCGAGGAGAACAGCTGTGTGCTGCAGACCTTCCGGAGGTTGCGCCAGCACTGATCCACCTGGCCGAAGGCTAACGAGTACTTTATGTGGCCGAGGGCCCACACAGCGTCAGGGGGCGAGCGGCCGCAGAAGTCCTGATCGCGCGTTTTGAGGACCTCGCGGGCGACGTCGGGGGAGGAGACGACGACGGTGGTGACGGCCCCGAGCCGGACAGACATGAGGGGACCGTAGGTCTTGGCGAGCCTGGCGAGGGAGCGGTG…	475	4.99	0.03	Os: CYP734A1	C-26 hydroxylation
192	root_contig_7806	CTCCACCTCCCCGTTCTTTTCCATGAGGGCGCTCACCTCTCCGACCATCTGCGCGCCGATCGAGCGGCGGCGGTCGCCGAAGGCCGCGATCCGCCGCGGGCTGAATAGATGGACGGACGAGATCCTCCGGAGGTTCCTCCAGTACTCGCCGAAGGGCGCGAATCCCATCGCGCGGTGGAAGAGGAGCTCGTACGCCGACTCTTTGATCGGGCGGTCGGCGAAGGCCGAGCTCCCGAGGATCTCCTTCGCGGTCTCCGGGCGGCTCGAGATGATGAAGCGGGTGAAGCCCACTGAGAAGGCCATCAAGTGGGCGGCTTTGAGGGAGACAGCGAGCTTGGAGAGCGCGCGG	349	0	0.03	Mt: CYP97B7	b-hydroxylation
193	leaf_contig_5773	AGCAGCTGGCGGACCGGGCCCGGTCCAGGTCCGCCCACCGGTTCAGCCGCGGCGGGCAGGACCTCATCTGGGCCGACTACGGCCCCCACTACGTGAAGGTCCGCAAGGTCTGCAACCTCGAGCTCTTCTCCGCCAAGCGCCTCGAGGCCCTCCGCCCGATACGAGAGGACGAGGTCACCGCCATGGTCGACTCCATCTTCCGAGAATGCACCCACCCAGATAAAATCGGCAAGAGCTTGGTAGTGAAGGCTCATCTCTCGGGCGTGGCCTTCAACAACATCACGAGGCTTGCTTTCGGGAAGCGTTTCGTGAACTCGGAGGGTGTGTTGGACGAGCAAGGGAMKSGAGCTCTTCTCCGCCAAGCGCCTCGAGGCCCTCCGCCCGATACGAGAGGACGAG…	568	0	0.05	Sl: CYP72A186. GAME7	C-22 hydroxylation
194	root_contig_3926	GCCCGGTCCAGGTCCGCCCACCGGTTCAGCCGCGGCGGGCAGGACCTCATCTGGGCCGACTACGGCCCCCACTACGTGAAGGTCCGCAAGGTCTGCAACCTCGAGCTCTTCTCCGCCAAGCGCCTCGAGGCCCTCCGCCCGATACGAGAGGACGAGGTCACCGCCATGGTCGACTCCATCTTCCGAGAATGCACCCACCCAGATAAAATCGGCAAGAGCTTGGTAGTGAAGGCTCATCTCTCGGGCGTGGCCTTCAACAACATCACGAGGCTTGCTTTCGGGAAGCGTTTCGTGAACTCGGAGGGTGTGTTGGACGAGCAAGGGACTCGAGCTCTTCTCCGCCAAGCGCCTCGAGGCCCTCCGCCCGATACGAGAGGACGAGGTCACCGCCATGGTCGA…	551	0	0.05	Sl: CYP72A186. GAME7	C-22 hydroxylation
195	leaf_contig_12935	GGATTTGCCCGGGGCTCGGGCTCGCCCTGCTCCACCTCGAGTACTTCGTTGCGAATCTCGTGAGGGAGTTCGAGTGGAAGGAGGTGGAGGGGGAGGAGGTGGACTTGACGGAGACACTCGAGTTCACCGTTGTAATGAAGAATCCGCTCCGAGCTCGAATCTCCGCGAGACTTAACAAGTAATATGAATTAGAAGCATCTCCATTGTTGAACTTGTGATTTTTATGTGATGGTAATGTATGTAGGCGTTTGAATTTGGCGGAATTAGGAGAAGTATCTCCATTGTTCTGTGGTGGTAATTAGCACATAAACTGTAACTTCATTTGAAGTTGTTTATGTGTAATGGTGCTTTTAATAAATTGGTCACATATATTGATG	377	0
196	leaf_contig_4228	TTCACAGAGGCAATGGAAGCTTGGGCTCTCATCTTGCTTTCCCTCTCCTCCTGTACCGCTCTGGTCGTCGTCGGTAGTAACTTATTCAATAATCGGCGGCAGCTCCCGCCGGGGCCTCTAACGGTCCCGCTCCTCGGAAACCTCCTGTGGCTCCGCCGCCACTCATTTCGGAGCATCGAGCAGCTCCTCCGCGAGCTCCACCTCAAGTACGGCCCCATCCTCACCGTCCGCTTCGGCTCCCGTCCCGCAATCTTCATCTCCGACCGCCGCCTCGCCCATAAAGCCCTCGTCGAGCACGGCGCCGCCTTCTCCGACCGCCCCGCCGCCCTCCCCGCCACCCGCTTCCTCAGCAGCGACCAGCACAACGTCTCCTCCGCCCACTACGGGCCCCTCTGGCGC…	679	0
197	leaf_contig_45756	CAGTAGTGTCCGTGCCGGCGACAAATATATCAAGAATGAAGGCCTTGATGTTGTCTCTAGTCAGTCTCATCTCTGCATCCTCATCGTCGTATATATCAAGCAAGATGTCGAGCAGATCCTTCGTCTTATAATCAGCATCGCCACCGATCATCTTCTTCCTCCTTGACGCTTCCTTGTGCATCAAAATCCCCTCCATCATCTCATCGAAGCGGCGATGGATG	221	0
198	leaf_contig_46470	AATCTTTCGAGCCGCTTCGGTAGATGAGACCACTAACATCGGGGTCCGCCTGAGGTGGAAGAGAATGATGTGTCCATGCCGCTCGGAGAGGGCACAGAACGAGCGGTGGGGCAGCGAGCCGACCTGGTGGAGGTTCCCTATGAAGGGGAGCTTCGGCGGAGATGGAGGAAAATAAATCTTCAAGAGGATTATTTTCTCACGAATTTTACTAGAAAGAGG	219	0
199	leaf_contig_4698	GAGAGCATCAATTGGCTCAAGTCGACGGTTTGATAGAGACCAGGACGTCTCGACGCATTTTGAGGCTTGTCAATGTTGTGATATGGATGAACCGGCGGCGGGTCATTGACAATCGATGACACCATAGAGGCCACCTCCTCCTCCCTCGCCGCGCGAAAGGACTCCACGCGCTTCGAGCTGAAGAGCTTCATGGTGCATATCTTGCGCGCCTCCCGCCAGTACTGGCCGTAGGGTGCGAAAGTGATGTCGGAGAGGCCGTAAGAGAATTTTTCACCAACGTAGAGGACCGGGCGGCCTGAGAAGGTGATGTCGTAGGCCGGGAAAATGGATTTAAGGGCAGCGGCGGAGGAGATGACAAGGCTGGGCACGGAACCGAGCTGGAGGGACATGAGGGGCCCG…	637	48.62
200	leaf_contig_49254	TATCAGTTCGGCCATCGCCCATTCCGTTGTGGTCGACGTTGTGTCAGTGCTGGCAGTCACCAGATCCATGAATAGTGCTTTGATGTTGTCCACACTAGGTCTCTCATCATCCTCACCATCACCATCCCCCGGAAGCTCCAGCATTGCCTGAAGCAAATCCTTTGGTGTCTCTCTACCACCACTACCGCCACCGTCATTCAATCTCAGCCGTTCA	214	3.16
201	leaf_contig_7993	GACGCGCTTCCGATCTGTGCAGATAATGCGCAGCCTCCGCCACTCGGGCCCAACCGGCAGCCAGGCGAAGGGCACGCTGTTCACGTCGAGGGCGTGGGTCACGTCGGGGGCGTAGCGGCCGGAGAGTGTCTTGTCGTTGGTTCGGATGACTTCGCGGGCGACGGCGGGGGATGAGACGACGACGGTGGTGACGCGACCGACGTTGACGGTCATGAGGGGGCCGAAGGATTTGGCGAGGCGGGCGAGGGAGCGGTGGGGCTGGTCCCCGAGCGCGAGGAGGTTTCCTAGCAAGGGTAGGCCACGGGGCCCCGGTGGGAGCTTCCGTCGGCGGTACGAGGATAGGAGCCATGTGTAGAGGAGGGTGACCGAGAGGAGGAGGAAGAGGAAGAGGTATTGGTC…	478	0
202	stalk_contig_27414	GGTGCTTTATTGAATTTGATACAGTTATTAACAAGATATTAGAGGATCACCAGCTGATTCGTGTTAACAACTATCAAAGGCTTGAAGATGACAGCCACCAAAACTTTGTTGATGTTCTTCTGTCACTAGAAGCTAATGACGTTGATAAGGTCGGCATCTCACTCGAAAGAAACAGCATCAAAGCCCTCCTTATGGATGTTTTTACTGCTGGGACGGATACCAACTTTGCG	230	0
203	stalk_contig_3921	CTTTCCCTACACGCCCCTCTTCCGTTCTCTTTAAAGAGCGTGCCGACGAGTGCCCGGACCTCGCCGGAGCGGAGGTCGGAGGAGGCGTTGACCCGGGTGGAGGAGAAGACCTCGAGGGTGGTGAAACGGCGGAGGTTGCGCCAGTGGGTCCCGTACGGGGCCCATGCGACGGAGGTGTAGCCGTATCCGAGGTGCTCGCCGGCGAGGAGGCGGGGCCGGTTTGCGAAGGCCACGTCGTTCTTCGTGAAGCACTCCTCGGCGGCGGCGACGGAGTTCACGACGAGGACGCGGCGGGAACCGAGTTTGAGTAGGAGGACGGGGCCGTGCACGGCGGAGAGCCGAGCGAGCGAGCGGTGGAGGGGCGGTCTCCTCAGCAGGTGGAGGTGGCCGAGGAACGGA…	618	4.15
204	stalk_contig_9641	TACGTGTCGGAGCTCTTAAGCAGCCGCACCCTCGACCGCCTCCTCCCCGTCCGGCGCAAGGAGAACCTGAGGTTCCTCCGGTCCTTACGCCGAGCGGCGGATGCGGGAGAGGCCATAGACGTCAGCAAGGAGCTCGCAAAGCTCGCCAACAACGTGATATCCCTGATGACGATGGGCCGGCGGTGCTCGGAGACCGACGGGGAGGAGGAGTCCATCCGGAAAATTATGTTGGGGACCTCGGAGCTCTTGGGGTCATTCAACTTAGAGGACTACTTCGGATTCTGCAAGAACCTCGACCTGCAGGGACTTGACCGGCGGCTCGAGGAATTGCACCTCCGGTTCGATGGAATGATTGAGGGGA	361	0
205	stalk_contig_5891	ACGACGACGGTGGAATCTCCGCCACTCGGGCCCCACCGGCAGCCAGGCGACGGACACGCTGTTCACGTCGAGGGCGTGGGTCACGTCGGGGGCGTAGCGGCCGGAGAGTGTCTTGTCGTTGGTTCGGATGACTTCGCGGGCGACGGCGGGGGATGAGACGACGACGGTGGTGACGCGACCGACGTTGACGGTCATGAGGGGGCCGAAGGATTTGGCGAGGCGGGCGAGGGAGCGGTGGGGCTGGTCCCCGAGCGCAAGGAGGTTTCCTAGCAAGGGTAGGCCACGGGGCCCCGGTGGGAGCTTCCGTCGGCGGTACGAGGATAGGAGCCATGTGTAGAGGAGGGTGACCGAGAGGAGGAGGAAGAGGAAGAGGTATTGGTCTGATGGTAGCTCCATTGT…	477	0
206	stalk_contig_15300	CTTATCAAAAATATTCACCATGGATGCCAACTTCTCCTACCTCACAATCTCCCTCTTTATCCTCTTCCTTTTCATCATCAGAAAGCTATTTTTCGCAGCGAGTAGCGGCGATCTCCCGCCGAGCCCTCGGTCGTGTCCGATCATCGGCCACCTCCACCTCTTAAAGAAGCCCCTCCACCTCGCCCTCGCCCGAATCTCAGCAATATACGGCCCCCTCCTCCTCCTCAAATTTGGCTCTCGCCCCGTCCTCATCGTTAATTCTGCCGCTGCCGCCGAGGAGTGCTTCACGAAG	292	0
207	stalk_contig_4246	CCACCGAGATCTACACGTTTTCCTAGCGGGAGGCTCTTCCGATCTGGCCCGGACTGCCATGTTTCGTTTTATCGGCCACAGCCCGGATCAGCGGAAGGAAGATCTCCTCCTGCCGCCGCCGTAGCCCCAGCAGCTCGTTCCACCGATTCCGGAACAGAATTTTAGTGATCTTCGGGAGGAACCCGAACACGCCGAACTTCTTGATTGCCGTGAGGAGTGTCCTCTGCACGTCCTCGATGTCGCCGATCACCGACTCCTCGAGCCTCTCACCGAAGCACATGAGGACGAGCAGGCTGAACATGGTGTAGTGGAAGCAGTCGAGGACTCCTACCACCTCATCTCCGGCGTCCCCAGCTTGGTCCCGAAGCCGGTCCAACAACAGTCCGAGTACCCACGAGC…	586	0
208	stalk_contig_16389	CAAACTTAAGGCAAAAATATGGTCCAATTTTATGGCTCAAAATAGGTGCTATAAACACTATGGCAATACTCTCAGCCAAAGCAGCCACAATATTTTTCAAAAACCACGACCACAATTTTTCAGACCGAACCGTAATTGAAACTATGCGTGTCCATAATTACGACAAATCATCCTTAGCTTTGGCGCCTTACGGCGCCTATTGGCGGCTCATGCGCCGTCTTGTAACCGTTGATATGTTGGTCATGAAACCCATAAACGACACACATCGGAAACACGTCGTGTAGGG	286	0
209	stalk_contig_11017	AGCGGAAGAGGTTAGAGATATTGCTCGCGATGTCCTTAAGATCTTTGGAGAATATAGTGTTACTAACTTCATTTGGCCTTTGAACAAGTTTAAGTTTGGAAACTATGAGAAAAGAATTGACGAGATTTTCAATAAGTACGATCCTATCATTGAAAAGGTTATCAAGAAACGACAAGAGATTGTGAACAAAAGAAAAAATGGAGAAATCGTAGAGGGTGAGCAGAGTGTAGTTTTTCTTGATACTTTGCTTGAATTTGCTCAAGATGAGACCATGGAGATCAAAATTACAAAGGAACAAATCAAGGGACTTGTTGTCGATTTCTTCTCAGCAGGGACG	337	0
210	stalk_contig_32222	TCCCCACCACTCGTTCTATTTCCTCGGACAACTTTTGTTGTATATCTTGATGCTTGACGAGCCTTGCCATAATCCATTGCAGCGCCGTCGCCGTCGTATCGGTCCCTCCGGCGAGGAACTCCGAGCAGAGGCTCACGATCTCGCCCTCTGTCGGGCCCCGTCCTCCCTCCTCAGGGATTCGAACGCCAAGGAGCGACTCAACATAGGAGTAAC	213	0
211	stalk_contig_4128	GCCGTATCATTAAAAAAAACAACATAAATACTCTACACCAACACAAACACATCACACACACCACAACTCTATACATCTCTCCTCTCCTAGACTGGCTCGGTGGGTGGTTGGGGGTTGGGCGGGGGGGGGCCGTACGGGGCCCATGCGATGGAGGTGTAGCCGTATCCGAGGTGCTCGCCGGCGAGGAGGCGGGGCCGGTTTGCGAAGGCCACGTCGTTCTTGGTGAAGCACTCTTCGGCGGCGGCGACGGAGTTCACGACGAGGACGCGGCGGGAACCGAGTTTGAGTAGGAGGACGGGGCCGTGCACGGCGGAGAGCCGAGCGAGCGAGCGGTGGAGGGGCGGTCTCCTCAGCAGGTGGAGGTGGCCGAGGAACGGAATCCCGGCGGGGCTCGGCGGC…	597	4.15
212	stalk_contig_23777	ACGCTCTTCCGATCTGTCCAGTCATCTCCATAGTACCTCTTTCCAGAGATCATTCTCATGATGTTGTTGAAGGTCATATCAAAGAATCTGAAAGTAAGTTCTACTTCAGCAAATTTAGTGGATGAATCTTCAGCCAACTTCTTGATCAATCTCTGAGTCTCATCCCTTCGAATTGGAGCAAAATTATTGATCCGGTGGTTTGAAAGTACGTCAAGAGAAGTGATACGACGAAGGTTACGCCAGTGTTC	248	0
213	stalk_contig_11308	GGGGATGAGACGACGACGGTGGTGACGCGACCGACGTTGACGGTCATGAGGGGGCCGAAGGATTTGGCGAGGCGGGCGAGGGAGCGGTGGGGCTGGTCCCCGAGCGCAAGGAGGTTTCCTAGCAAGGGTAGGCCACGGGGCCCCGGTGGGAGCTTCCGTCGGCGGTACGAGGATAGGAGCCATGTGTAGAGGAGGGTGACCGAGAGGAGGAGGAAGAGGAAGAGGTATTGGTCTGATGGTAGCTCCATTGTAGCTACAGACTGAATTAATGTTTATATCGCGAGCAACAGAAAACAAATAGTCAGCTGCGTAACTGAACAGATTTGCTTGTAG	333	0
214	stalk_contig_25346	AGGAAGAGTCTCATGTCGAAGCTAATGGAAACGATTTTAGGTACCTTCCTTTCGGTGTTGCAGAAGAAGTTGCCCCGGAATTATTCTTGCTTTACCTATCCTTGGTATCACTATTGGGCGTCTCGTTCAGAATTTCGAGCTTTTACCTCCACCTGGACAATCTAAGATTGACACTTCTGAGAAAGGAGGACAATTTAGTTTGCACATACTCAAACATTCCACCATTGTTGCTAAGCCAAG	240	0
215	stalk_contig_5582	TGATGGAGGCCATGAGGTGATCGATCTCCTCCTTCCGCACGGGGGCAAAGGAGTCCACCTTGTGGGAGCTTAAGAGCTCCGTCGCGTAGAGCTTGCGGACGGCACGCCAGTAGGGCCCGTGGGGGGAGGGGCCCAGGCCGGTGCTGCCGTAGGCCAAGAAGTTAGAGGCCTCCAAGTGAGGCCTACCGGAAACCGCCAGGTCATGGGACCTGATGAGGTGGCGGGCGGCAGCACCGGAGGAGATGATGGTGGTGGAGATGGAGCCGAACCGGAGACGCATAACGGGACCGTAGGCAGCCGAGAGGCGGTGGAGGTCGCGATAAGGGCGCGAGCTCACCAAGTGGAGGTGGCCTATGATCGGTAGGCCCCGTGGACCCGGCGGGAGCCTTTCATAGCCCT…	493	0
216	stalk_contig_23055	GGTTAAAGATCGTAGGTTGCAGCTTTTCAAAGACTACTTTGTTGATGAAAGAAAGAAGCTTGGAAGCACCAAGAGCACAAGCAATGAAGTACTTAAATGTGCTATTGATCACATTTTGGATGCTCAAAAGAAGGGAGAGATCAATGATGACAATGTTCTTTACATTGTTGAGAACATCAATGTTGCTGCAATTGAAACAACATTATGGTCAATTGAATGGGGAATTGATGAAATCGGAAGAGCGTCGTGTA	251	0
217	root_contig_3755	CGGCCCCGTCTTTCTTCGATTGGAGGTCGCCGAGGAGGAGGCCGAGGACCCAGTTCCGGCCGTCGGCGTACATTTTGACACGGGAGGGGTGGAGGATCTCAGAGGTGAGGTTGCGGCGGAGGAGGCGCCATAGCGGGCCATAGTGGGCGGAGGAAACGATGTGCTGGTTGCTGCTGAGGAAGCGGGTGGCGGGGGGTGCGGGAGGGCGGTCGGAGAAGGCGGCGCCGTGCTCGACGAGGGCTTTATGGGCGAGGCGGCGGTCGGAGATGAAGATGGCGGGACGAGAGTCGAAGCGGACGGTGAGGATGGGGCCGTACTTGAGGTGGAGCTCGCGGAGGAGCTGCTCGATGCTCCGAAATGAGTGGCGGCGGAGCCACAGGAGGTTTCCGAGGAGCGGGA…	569	24.11
218	root_contig_17544	GGTGTCGGTCCCTCCGTTGATGAACTCCGAGCACAGCGTCACGAGTTCCGCGTCCGTCGGGGAGGAGCTCCGGCCTTCGACCTTGAGGTCGAACAGCGAGTCGAGGTAGGAGGACGGTTGATTATACTTACTGTCATTCTTAAGAATGCAGCGTCGCTTCTCGATGAGCGGGAGAAGAGTTTGCATCTGCAGCCGCCGCACCGCCGCCGCCGCCTTCCTTTGTTTGTAGAAGAAC	235	0
219	root_contig_3349	ATACTCATTAATTAAGGTGGGCGAGAGAGAGATAAAAATGACTAACGACTATGAGTGCCTTGATGACAACGTCGGTGTAGTACTCTGGGTCGGAGTTCTGCAAGGACAACAGAACTCCGATCACCGTCTTCTCATCCTTATCCTTGTCTGCCTTTCTCCTATGCTCATCGATAAGCCCCTGCAAAAATTGATCCCTCGAGCTCTGCAGACTAGACAACCTCTTCTTCACCCCATCGAGGTTGAGCCACCTCATCAACGGTACAAAGTCCCGAATATTTGACGACGCCGCGAGCTTGGACGTCTCCGCCACCATCCCTTGGAACCTCCTCGCTTCCCCGTCACCCCCCTTGGCATCATTGTCATAGTACCGTTTCCCCGCCACCATGGTCATGATCACGT…	616	10.48
220	root_contig_23336	GGCTCGGATCTTTTCGACCATTAGGGCGACCTCCTCTTGACGAACCGGTCGAAATGATTGGACCCTCTTGAGGTTCAAAAGGTGGACGACGCAGATCCGCCTAATCTGTCGCCAGTACTCCCCGTAGGGCGCGAAGGCCACGTCGCGGGATCCGTAGACCAGCCTGTTGGCCATGGTGGAATGCGGGCGGCTTGAGTAGATGAG	204	0
221	root_contig_4424	CTCTTCCTCGTCGTGACCTCCGTCGCCGCCGCCGAGGAGTGCTTCACGAAGAACGACGTGGCCTTCGCAAACCGGCCCCGCCTCCTCGCCGGCGAGCACCTCGGATACGGCTACACCTCCGTCGCATGGGCCCCGTACGGGACCCACTGGCGCAACCTCCGCCGTTTCACCACCCTCGAGGTCTTCTCCTCCACCCGGGTCAACGCCTCCTCCGACCTCCGCTCCGGCGAGGTCCGGGCACTCGTCGGCACGCTCTTTAAAGACCACCAGGCGGCGACCGGGCAAAAGGATGACTCAACCAAGTGGCAGGCCTCATCTTGGATGCGAGCTGAGATGAAGTCCAGGTTCTTCGAGCTGGCGTGCAACATCATGATGAAGACGCTCTTTAAAGACCACCAG…	507	0
222	root_contig_4405	ACCGAGATCTACACTTTTTCCCTGAACGACGCTCTTCCGAGCTGGTGAGGTTGCGGCGGAGGAGGCGCCATAGCGGGCCATAGTGGGCGGAGGAAACGATGTGCTGGTTGCTGCTGAGGAAGCGGGTGGCGGGGGGTGCGGGAGGGCGGTCGGAGAAGGCGGCGCCGTGCTCGACGAGGGCTTTATGGGCGAGGCGGCGGTCGGAGATGAAGATGGCGGGACGAGAGTCGAAGCGGACGGTGAGGATGGGGCCGTACTTGAGGTGGAGCTCGCGGAGGAGCTGCTCGATGCTCCGAAATGAGTGGCGGCGGAGCCACAGGAGGTTTCCGAGGAGCGGGACCGTTAGAGGCCCCGGCGGGAGCTGCCGCCGATTATTGAATAAGTTACTACCGACGACGA…	509	24.11
223	root_contig_5569	CTGGCCCGTCGTCGGCAACCTCGTCCAGGTGATCCTCCAGCGCCGCCCCTTCATGTACGTCGTCCGCGACCTCCGGACCCGCTACGGCCCGATCTTCACCATGCGCCCTCTTCCTCTTGGGCGCATCCTTCCTGGCCTTCCTCTGGTGGCGGCGGTGCTCTAAAACCGGCGGCGGGCCCAACAACCTCCCCCCGGGCCCACCGGGCTGGCCCGTCGTCGGCAACCTCTTCCAGGTGATCCTCCAGCGCCGCCCCTTCATGTACGTCGTCCGCGACCTCCGGACCCGCTACGGCCCGATCTTCACCATGCGCCCTCTTCCTCTTGGGCGCATCCTTCCTGGCCTTCCTCTGGTGGCGGCGGTGCTCTAAAACCGGCGGCGGGCCCAACAACCTCCCCCCG…	433	0
224	root_contig_3750	CAAGCAAAGGCCAAAGCAAATCTGTTCAGCTCGATCGCGATATAAACATTAGTTAGTTCAGTCTGTAGCTACAATGGAGCTACCATCAGACCAATACCTCTTCCTCTTCCTCCTCCTCTCGGTCACCCTCCTCTACACATGGCTCCTATCCTCATACCGCCGACGGAAGCTCCCACCGGGGCCCCGTGGCCTACCCTTGCTAGGAAACCTCCTTGCGCTCGGGGACCTGCCCCACCGCTCCCTCGCCCGCCTCGCCAAATCCTTCGGCCCCCTCATGACCGTCAACGTCGGTCGCGTCACCACCGTCGTCGTCTCATCCCCCGCCGTCGCCCGCGAAGTCATCCGAACCAACGACAAGACACTCTCCGGCCGCTACGCCCCCGACGTGACCCACGCCCT…	569	0

## Sheet: Table S6
Table S6. Annotation of transcripts from subtractive libraries identified as potential transaminases.
No unigenes	Unigenes ID	Nucleotide sequence	Unigene Length	FPKM	TPM	Blastx E-value	Blastx accession (E-value)	Function	Organs blastn E-value	Organs blastn accession (E-value)
1	CHL-RDA_contig_2081	CCATGAACAGATCATTGGAGGGGGTTTGCCAGTAGGTGCATATGGAGGTAGGAGGGATATTATGGAGACGGTGGCTCCGGCTGGACCTATGTACCAGGCTGGGACGTTGAGTGGGAACCCTTTGGCCATGACTGCAGGTATAGAAACTCTGAAGCGTATTAAGGAGCCAGGAACTTACGAATACTTGGACAACGTTACAGGTGAGCTGTTCATGGA	216	29.07	11.85	0.000185	Vc: GABAT2	transamination
2	CHL-RDA_contig_519	TCCCCGACATCGTCACGCTCTCCAAGTCCATCGGCGGCTACGGCCTGCCCATGGCCCTCACGCTCCTCAAGCCGGAGCTCGACCAGTGGAAGCCGGGCGAGCACAACGGCACCTTCCGCGGCATCGCGCCCGCGTTCCTCACGGGCGCCGAGGCGCTGCGGCTCTACTGGGCCGACGGCGAGCTCGAGGCGTCCACGCTGCGCAAG	206	203.2	82.84	0.000656	Vc: GABAT2	transamination
3	MeJ-RDA_contig_1251	TCTCACCGCAGATCTTATGTTTATGACATTAAAGGGAAGAAATATCTCGATGCTCTTGCTGGGTTATGGTGCACAGCTTTAGGTGGAAATGAGCCTCGTCTTGTAGCTGCTGCAACTGAACAAATGAATAAATTGCCATTCTACCACTCCTTTTGGAATCGAACAACGAAACCTTCTTTGGACCTTGGAGCAGAACTTCTTGAGATGTTCATGGATAG	218	32.59	12.88	2.51e-44	Vc: GABAT2	transamination	2.43e-100	root_contig_544
4	MeJ-RDA_contig_3385	ATATTGACTATGGGACTTCAGGAAAAGTTGCTGGATTTATAGCTGAAACAATTCAGGGGGTTGGAGGAGCAGTTGAGCTCGTACCCGGTTATTTAAAACATGTCTATGACATAGTACACAAGGCTGGCGGTGTCTGCATTGCAGATGAAGTCCAAACGGGCTTTGGTCGCACGGGAAGCCATTACTGGGGATTCGAGACGCAGGGTGTTATTCCTGATATAGTTACAATGGCAAGGGGTATTGGCAATGGTTTGCCATTAGGAGCTGTAGTCACAACTCCAGAAATAGCAAGCGTGATGGCCCAGAAGATTCAATTTAATACATTTGGTGGGAACCCTGTATGTTCTGCCGGGGGGCTTGCGGTGCTCAAGGTTCTAGATAACGAGAA	388	12.21	4.83	4.02e-21	Vc: GABAT2	transamination	1.13e-88	stalk_contig_579
5	SQ-RDA_contig_4717	GATCTGGATTCATAACATGATGAATTTCACCCTGTGGTATTGGGTATTTCCATGTGTTAAGAGCGGTGAGACCCATTATACTAGAACTTCCGCCAGGATATGCATTCCTTAATGAAATCATACCAAGATTACCAGTATACAATCTGGCCATCAGCATTGCCAACTCATTGGCTTCAGAACCAGAATTTACAAAATATACAACTCTAAGATTTCCGGGCATCTTCGCTGCCAATGCCTCGGCAAAGTCACCTATAGCATGGTGTAAATATATAGTGGTTGCATGCTGCAACAGTTTACTCTGCTCAAAGATTGCATTCAAAATATCAGGGTGGCAGTGTCCAGCCGAAACAGTAACGATCTGTTCATGGAT	370	7.43	2.63	3.39e-05	Vc: GABAT2	transamination	3.52e-63	stalk_contig_579
6	SQ-RDA_contig_2096	AGCGAATAATTGTGTCATGTGTTGACTTGGCAAGAACTCCTCTGTCCTTCAATTTTTCGCTTAACTCAAAGCCTGATACAGGGTTCAAATTTTCGCTGTTAAGCTCCACACCAATGAACAATCCTCTTCCCCGCACCACCTTCACGTGGTCCGGATATTGTTTCTGAATCTTATGCAGTAGACCGAGAAGCTCACCTCCCATTTGGGTAGATC	213	12.91	4.56
7	SQ-RDA_contig_2515	CAGATCGTCCCCGACATCGCCACGCTCTCCAAGTCCATCGGCGGCTACGGCCCGCCCATGGCCCTCACGCTCCTCAAGCCGGAGCTCGACCAGTGGAAGCCGGGCGAGCACAACGGCACCTTCCGCGGCATCGCGCCCGCGTTCCTCACGGGCGCCGGGGCGCTGCGGCTCTACTGGGCCGACGGCGAGCTCGAGGCGTCCACGCTGCGCAAGGGCGAGCGGATCAGCAGTAGGCGACACAGTGCTTGTTGCAATCGACGGTGCATCCGCCGCCGCCGCCACCGGAGCCGTAGTTCTTGCCCGACCGGCTATAGGA	316	134.86	47.65	0.04	Vc: GABAT2	transamination
8	SQ-RDA_contig_1993	TCCATGAACAGATCATTGGAGGGGGTTTGCCAGTAGGTGCATATGGAGGTAGGAGGGATATTATGGAGACGGTGGCTCCGGCTGGACCTATGTACCAGGCTGGGACGTTGAGTGGGAACCCTTTGGCCATGACTGCAGGTATAGAAACTCTGAAGCGTATTAAGGAGCCAGGAACTTACGAATACTTGGACAACATTACAGGTGAGCTGTTCATGGCATCGTTGAAGCTGGTAGGAGGGCAGGTCATGCAATATG	255	64.69	22.86	0.000148	Vc: GABAT2	transamination
9	SQ-RDA_contig_2548	CCATGAACAGATCCGCTCGCCCTTGCGCAGCGTGGACGCCTCGAGCTCGCCGTCGGCCCAGTAGAGCCGCAGCGCCTCGGCGCCCGTGAGGAACGCGGGCGCGATGCCGCGGAAGGTGCCGTTGTGCTCGCCCGGCTTCCACTGGTCGAGCTCCGGCTTGAGGAGCGTGAGGGCCATGGGCAGGCCGTAGCCGCCGATGGACTTGGAGAGCGTGACGATGTCGGGGACGATCTG	234	35.25	12.45	0.000362	Vc: GABAT2	transamination
10	CHL-RDA_contig_1099	TGCTTTAACATGTAATCCTTTATAACGAGCCTCTCTAACTGATTTTCGAAGCTCATTAGTATCCAGACCCCAATTTGCTGTCTCTTCGAGGTAGTATGGAACAAGAGTACCACCAAGAAGAGCAATTGTTGCAGAATAGAGTGGGTATTGTGGGACTGGAACCATAATCCCATCTCCTTCGCCTCTGATGATAGTATTTAATATCTGCATCACAGCCTTGCTCGCACCATCAGTAAGATAGATGAACTCTGGATCTGTTCATG	263	15.92	6.49				1.36e-47	stalk_contig_2474
11	CHL-RDA_contig_2466	CTGTTCCCTTACGTCAGCACTGAAGCCAGTCACCTCCATGTAACCTCCCCTCTTTCCACATTCTCCATAGTATCCCTTAGAAACAGACTGAAAGGAAACTAGAGCAAGGTCATGCTCGCTGTATCCCATTGACCTGGAAATCTTCTTAAAGGAGTTGAATTCCTTATCGTCCACATAAACATTTTCTTGGTATACCTCATCAGCAAGGATAACCAGGCCTTCCTCCCCGCAGAATTCTACTATTTCCCTTTGGTTTCCCTCGGTGAGAATCTGTCCCGTTGGA	283	36.98	15.07				1.38e-22	stalk_contig_27206
12	CHL-RDA_contig_2852	CTCTCACCGCAGACTTTTTCAAGAAAACTAGGAGTATACTGAAGCAAACAGCTGACAAGTGTTATGATACATTAAAGGAGATTGACTGTATTTCTTGTCCCCACAAACCGGAAGGCGCCATGTTTGTAATGGTGGAATTGGATATGTCATATTTAGATGACATTCAAAATGATGTTGACTTCTGCTGCAAGTTGGCCAAAGAGGAATCAGTGATTATTCTACCAGGAAGTGCTGTAGGCCTGAAGGGATGGCTTCGCATCACCTTTGCCATAGACCCATCCTCGCTCGAAGATGGACTCGCGAGGCTGAAATCCTTCTGCCTGAGGCACCAAAAGTGAAGCAGGGAAGC	349	11.99	4.89
13	CHL-RDA_contig_1882	GCTTTCAACTCAATAGTCCATTCCTTGTACAATTCCACTGTCTTTAAGAATGGTAGCCACAATGGATGCACCATGAATAGGAGGACTAGAATACATAGGCCTAATCACAAGCTTCAGTTGGCTCTCAACCCTGCTTGAAACATCAGCTGACTTGCTGACAATGCTCAAAGCACCAACACGTTCACCATAAAGACCCATGTTCTTCGCATAACTCTGGGCTGCCAGCAATTCTCCACCATCAGCAACAAACAAACGAACAGGCTGTGCATCTGCATCTAGACTTCCACTGGCAAAACCCTGATAAGCACTGTCAAAGAAAAGTAACAGAGATCTTTGATCTGTTCATG	347	48.25	19.67
14	CHL-RDA_contig_2465	TTCCATGAACATAACCTCCCCTCCTTCCACATTCTCCATAGTATCCCTTAGAAACAGACTGAAAGGAAACTAGAGCAAGGTCGTGCTCGCTGTATCCCATTGACCTGGAAATCTTCTTAAAGGAGTTGAATTCCTTATTGTCCACATAAACATTTTCTTGGTATACCTCATCAGCAAGGATAACCAGGCCTTCCTCCTTGCAGAATTCTACTATTTCCCTTTGGTTTCCCTCGGCGAGAATCTGTCCCGTTGGA	254	0	0				5.56e-27	stalk_contig_27206
15	CHL-RDA_contig_264	CACCGCAGATCCGACGCGGATGTCGATGACGAAGTCGAGCACGGCGCCGGAGACGGCCTTCACGTACTTGGCCTGGCCGCGCGGAACGTCGGCGAAGTGCACGCCGCGGACGACGCCGCGCGTGGAGACGCTCATGTTGGCCTGACGCAGGTCCAGCCGGTGGCCGACGACCCGCTCGAGCTCGACTTCGTCATCGACATCCGCATCGGATCGTGAGCGCGGTGCCCGTCGGGTTGTTCGGCGAGGTGAGGAACACGACGCTCGGCTGGTGCTCCTCGACGAGCGCCGTGACGTCCGCGAGGTCGAGCGTGAAGTCCTCGTGGCGACGGCCGGAGACCCAGCGCGTGAGCGTGTTGCGCGCGTG	364	488.75	199.24
16	CHL-RDA_contig_1768	CACCGCAGATCCATTATCCTTCGCAGATTGCACCAGTTGTTTCAATTGGTCTCTGGATGCTGCTGAACCGGTTGGGTTGTTTGGCGAACAGAAGAAGATGGCATCTGCTCTCGGAACTGTTAATAAATCAGGAAAGAAACCATTCTCCGGGGAGCATCTCATATACTCAATGTTCACATAATTCTCAATGACAGTTTCGTATAAACCAGTTTGACCCATAATAACACTTGAATCTACATATGAAGGGTAAGATGGGTCTTGAACTGCTATCTTGACATCAGATCTG	286	29.27	11.93				1.06e-131	root_contig_567
17	CHL-RDA_contig_2569	GATCACTTCTGACCCTCCAACCATTATGCAGGCAGCAGTACCTCAAATCCTTGAGAAAAAAAAACCTGAATTCCATTTAAAAATCTTAATTACAAGAGGGAAGCTGCAGATTTAATCTATGATGTATGTAAGGAAATTTCTTGCTTGACATGTCCTCACAAACCAGAAGGAGCCATGTCTGCTATGGTGGAGATTAATTTTTCACAAGTTAAAGGCATTATTGATGATGTGGATTTCTGTGACAAGCTGGCCAAAGAGGAATCTGTAATACTTCTTCCGGGTGTTACTGTTGGACTAAAGGATTGGCTTCGGATTAGTCTTGCTGTTGACCCTTCTGATCTGTTCATG	348	6.01	2.45
18	CHL-RDA_contig_1855	TATGGAACTCTTCATGGGCGTCCGATAGGATAGCAGGAACTGCAGCCTGAATTATTGAAGATGGCCCAACAGATACATTCATAAGCATCTCAATCGCCATCCTGACTTGTCGAATAGTGTCGTGAGGGTCGCTTATGGCTAGCCATCCAAGGCGCCACCCAGGAACCATCCAACGCTTTGAGAGTGCTCCTATGGTGATAACTGGTGCCAGGTGAGCAAAAGAGGCCATCTGCACAAATTTGCTTCCCCCAAAGGCCATATGTTCATATATCTCATCAGCAACGATAGGGACACCCAACTCTCCAGCAGTTTCAGC	316	13.24	5.4				2.6e-165	stalk_contig_1488
19	CHL-RDA_contig_2560	TCCATGAACAGATCCTGAGAGGGATGCGAAGGCAATACGGATATTTCTTGAGGATGGACATCTAATTGGCTGTGCTCAATCATATGCAAAAAATATGGGACTCTATGGACAGAGAGTTGGATGTCTCAGTATCCTTTGCGAAGATGAGTTGCAGGCAGTGGCAGTGAAGAGTCAGTTGCAACAAATAGCGAGGCCTATGTATAGCAACCCACCTGTTCATGGTGCCCTAATTGTTTCAACCATCCTCGGCGATCTGCGGT	261	56.13	22.88
20	CHL-RDA_contig_1266	GTCACCAATAACTTGGCCAAAGTTAGACAAATTCTTGATGCATACCAACATCCAGCCCTCCTCCTTGTTGATGGAGTGTCATCCATTTGTGCTCTCGATTTCCGTATGGACGAATGGGGAGTAGATGTGGCCATAACTGGTTCTCAGAAAGCCCTTTCCCTTCCTACTGGGATAGGATTTGTGGTTGCAAGCCCTAAAGCTATCGAAGCTTCAAAATCTGCCAAATCACTTCGAGTTTTCTTTGATTGGGCTGATTACCTGAAATTCTACAAGT	274	15.28	6.23				6.01e-103	leaf_contig_37859
21	MeJ-RDA_contig_337	GAACAGATCGTCATCATCAATTATACTCCCATCTGGATTGTTTGGAGATGTTAAAAATATGCATTTCGGCTTCTCTTCTTTAACAACCTCTATTATTTGCTCCACATTCAAGCTGAAATCTGGCCTCCTTGGAACTTTGATGACAAGTGCACCATTAACTGCAGCATCAAATTCATACATTGTGAAAGTTGGAGGGCAGTCG	358	23.45	2.62				9e-36	leaf_contig_8157
22	MeJ-RDA_contig_165	ATGAACAGATCAATTGTGCCGGAATCTTGTTCCTTAAAATTTGAAAATACTTTTGCAATCTCATAAGGCTTCAAATGAATAGTTGTTTGGAAAGGAAGCCAGTTTGGTGAATAGTTGTTTGAAAATACCAAGTCTCCTATTTGGTTAATTGACTTGATTTGCTCCTTCGGTGGATCCAGAGTTCATCAATCTTACTGATGGTGCGAGCAAGGCTGTGATGCAGATATTAAATACTATCATCAGAGGCGAAGGAGATGGGATTATGGTTCCAGTCCCACAATACCCACTCTATTCTGCAACAATTGCTCTTCTTGGTGGTACTCTTGTTCCATACTACCTCGAAGAGACAGCAAATTGGGGTCTGGATACTAATGAACTTCGAAAATCAGTTAGAGAGGC…	412	74.72	29.54				2.66e-46	stalk_contig_2474
23	MeJ-RDA_contig_2113	CGCTTATGGCTAGCCATCCAAGGCGCCACCCAGGAACCATCTAACGCTTTGAGAGTGCTCCTATGGTGATAACTGGTGCCAGGTGAGCAAAAGAGGCCATCTGCACAAATTTGCTTCCCCCAAAGGCCATATGTTCATGTATCTCATCAGCAACGATAGGGACACCCAACTCTCCAGCAGTTTCAGCAATCTGTCGGAGGTGGGCAGCGGGGTAGACGACCCCGCAGGGGTTGTTAGGGTTGATGATGACGATGGCGGAGGTGGCGGAATCTGCGAGTGACCGGATCTGATCTGTTCATGG	301	102.28	40.44				1.37e-149	stalk_contig_1488
24	MeJ-RDA_contig_1681	GCCTCTCACCGCAATCTCGAGATCTGCCGTTCGAACGACATCCTCGTGCTGGAGGACAACCCCTACGGTCTCCTCTGGTTCGACCGACCGGCGCCGGACGCCATGCGCAGCCTCGACGACGAGGGGGTCATCTACCTGGGCTCCTTCTCCAAGACCCTCGCCCCCGGCTTCCGCGTCGGCTGGGCGCTCGCGCCGCACGCCATCCGCGAGAAGCTCATCCTCGCCCAGGAATCGGCGGTGTTCATGGATA	250	85.25	33.71
25	MeJ-RDA_contig_1169	CCATGAACAGACCATGTAACTATCTTGGTTTTGCTGCGGCTGATGAATACTGTACTCCTCGAGTAATTGATACATTGAAGAAGTATTCTCCAAGCACTTGCAGTACCCGGGTGGATGGAGGCACGACTGTACTTCACAAGGAATTGGAGGAGTGTGTTGCTAGTTTTGTTAGAAGGCCAGCTGCTTTGGTTTTTGGAATGGGCTATGTGACGAACCCTGCTATTCTACCGGTCTTGATGGGGAAGGGAAGTTTGATTATTAGTGATTCACTAAACCACAACTCAATTGTTAATGGTGCGTGGGGATCTGTTCATGG	316	37.47	14.81				2.45e-45	root_contig_528
26	MeJ-RDA_contig_3676	GAACTCCCCTAAAGGAGTTGATATTCCAGATCGCTACCTCTTTTTTCAGCAGGCAGATGCGGTCGTTATTGCCGCTGGCAGCAATCCCTAAGCGCAGTCCGGGAATGCCGTAGGATTTGGAAATGCTCTTTATAACCGTAAGATGGGGATACTCATCTAAAAGCTCTTCCTGTAAAAGGGTGGCATTTTCCTCATCTGCAAAGTCAACAAAAGACTCATCTGCAATCATATGAATGTTTCGCTCGCTCGTCCATCGGATCAGCCGCAGCATAACCTC	277	0	0
27	MeJ-RDA_contig_3187	AGCCATGAACAGATCACCTATCCAAAGGTTTGAACCGGCGGCTGAGGGATTCGGACGTTTTCCTAACGGTGGGGGGGACGCAGGCGCTGCAGGTGTGCGTCACGGTTGTGGCGGCGGCGGGAAGCAACGTGCTTCTCCCGCGACCTGGATTCCCGCCGTACGAGTCGGCGTGCGAGCTCAACGGCGTCGAGGTCCGCCACTACAACCTCCTCCCTCACCGGGGATGGCAGGTTGAC	236	0	0				2.04e-114	stalk_contig_2451
28	MeJ-RDA_contig_1301	CCATGAACAGATCAAAATCTCTGTTACCTTTCTTTGACAGTGCTTATCAGGGTTTTGCAAGTGGAAGTCTAGATGCAGATGCACAGCCTGTTCGCTTGTTTGTTGCTGATGGTGGAGAATTGCTGGCAGCCCAGAGTTATGCGAAGAACATGGGTCTTTATGGTGAACGTGTTGGTGCTTTGAGCATTGTCAGCAAGTCAGCTGATGTTTCAAGCAGGGTTGAGAGCCAACTGAAACTTGTGATTAGGCCTATGTACTCAAGTCCTCCTATTCATGGTGCATCCATTGTGGCTGCCATTCTCAAGGACAGGGATTTGTACAATGACTGGACT	332	99.86	39.48
29	MeJ-RDA_contig_2522	CACTATAAAGGCTATTTGCATCGTTCATAATGAGACAGCAACTGGAGTCACCAATAACTTGGCCAAAGTTAGACAAATTCTTGATGCATACCAACATCCAGCCCTCCTCCTTGTTGATGGAGTGTCATCCATTTGTGCTCTCGATTTCCGTATGGACGAATGGGGAGTAGATGTGGCCATAACTGGTTCTCAGAAAGCCCTTTCCCTTCCTACTGGGATAGGATTTGTGGTTGCAAGCCCTAAAGCTATCGAAGCTTCAAAATCTGCCAAATCACTTCGAGTTTTCTTTGATTGGGCTGATTACCTGAAATTCTACAAGTTGGGAACTTATTGGCCATACACTCCTTCCATTCAGCTTCTCTATGGTCTTCGAGCAGCTCTTGATCTGTTCAT	393	96.41	38.12				8.81e-103	leaf_contig_37859
30	SQ-RDA_contig_2491	GGGCTCGGGGTTGTGTTTAAGAGACAGATCATAAATCCTGGAAACCCTACTGGTCAATGCCTTAGTGAAGAGAATTTAAGAGCGGTTTTGCAATTTTGTTATGAAGAAAATTTAGTCTTGCTTGGAGATGAGGTTTACCAGACGAATATATATCAGGATGAGCGACCCTTCATTAGTGCCAAAAAGGTTTTGATGGATATGGGGCCACCTTTAAGCAAGGAAGTCCAGCTTGTTTCTTTTCACTCAGTGTCAAAAGGGTATTTTGGTGAATGTGGACAACGTGGTGGATATTTTGAAATGACCAACATCCCTCCAGAGACAGTTGATGAGATCTGTTCATGG	342	16.08	5.68				0.00588	root_contig_1248
31	SQ-RDA_contig_2043	CGTCGCGCCGGGCGCGAGCGACTCCGCGTCCTTCGACGAGGTGCTCGAGCTCCTTGGCGATGTCGAGCAGCGGGTCCTGGATGCCGAGGGCCGCGAGCACCTCGTCGACGTGGTGCCGGCACTGGCCGACCGCACCATCCTCGTGAACGGCGTCGCCAAGACCTACGCCATGACCGGCTGGCGCGTCGGGTGGATGGTCGGCCCGGCCGACGCCATCAAGGCCGCGGGCAACCTGCAGTCGCACCTCTCGTCCAACGTCTCGAACGTGTCGCAGCGCGCGGCCATCGCGGCGCTGCGCGGCCCCCGCGACACCGTCGAGAAGATGCGC	328	16.76	5.92
32	SQ-RDA_contig_2949	GAACAGATCACCATTGCTTTAACATGTAATCCTTTATAACGAGCCTCTCTAACTGATTTTCGAAGTTCATTAGTATCCAGACCCCAATTTGCTGTCTCTTCGAGGTAGTATGGAACAAGAGTACCACCAAGAAGAGCAATTGTTGCAGAATAGAGTGGGTATTGTGGGACTGGAACCATAATCCCATCTCCTTCGCCTCTGATGATAGTATTTAATATCTGCATCACAGCCTTGCTCGCACCATCAGTAAGATAGATGAACTCTGGATCTGTTCAT	277	114.15	40.33				1.43e-47	stalk_contig_2474
33	SQ-RDA_contig_1382	CCATGAACAGATCAGAAGGGTCAACAGCAAGACTAATCCGAAGCCAATTCTTTAGTCCAACAGTAACACCCGGAAGAAGTATTACAGATTCCTCTTTGGCCAGTTCGTCACAGAAATCCACACCATCAATAATGCCTTTAACTTGTGAAAAATTAATCTCCACCATAGCAGACATGGCTCCTTCTGGTTTGTGAGGACATGTCAAGCAAGAAATCTCCTTACATACATCATAGAATAAATCTGCAGCTTCCCTCATGATATTAAGAGTTTTTAAATGGAATTCAGGTTTTGTTTTCTCAAGGATTTGAGGTACTGCTGCCTGCATAATGGTTGGAGGGTCAGAAGTGATCTGTTCATGGA	360	34.36	12.14
34	SQ-RDA_contig_2663	GTCCAAGGTCTCTCCGGAACTGGTTCTCTGCGACTAGGTGCAGCTCTGATTGAAAGATATTTTCCCGGGGCAAAAGTTTTGATATCAAATCCTACGTGGGGTAATCACAAGAATATTTTCAACGATGCTCAAGTACCATGGTCTGAGTACCGATACTATGACCCCAAGACAGTTGGCTTGGATTTTGAGGGCATGATAGAAGATATAAAGTCAGCTCCGGAAGGAACTTTTGTGCTACTACATGGATGTGCACATAACCCTACTGGTATTGATC	274	0	0
35	SQ-RDA_contig_3861	TCCATGAACAGATCATTTGTCACAAACCAACCAAGCCTCCATCCAGGTACTATCCATCTCTTAGACAAGGACCCAAGAGTTATAACAGGAACAATAGACCCAAAAACTCCCATAGGCACAAAAGGATTAGCTCCAAATGCAAGGTGACCATAAACTTCATCAGCAATCACAATTGTTCCAAGCCTTTTTGCTGTTTCTGCAATCTTCTCCAAATGATGGTAAGTGTATACATTTCCACAAGGATTCCCAGGGTTTATAATCACTAACGC	269	15.33	5.42	0.05	Vc: GABAT2	transamination
36	SQ-RDA_contig_1046	CAGATCCGGTCACTCGCAGATTCCGCCACCTCCGCCATCGTCATCATCAACCCTAACAACCCCTGCGGGGTCGTCTACCCCGCTGCCCACCTCCGACAGATTGCTGAAACTGCTGGAGAGTTGGGTATCCCTATCGTTGCTGATGAGATGTATGAACATATGGCTTTTGGGGGAAGCAAATTTGTGCAAATGGCCTCTTTTGCTCACCTGGCGCCAGTTATCACCATAGGAGCACTCTCAATGCGTTGGATGGTTCCTGGGTGGCGCCTTGGATGGCTAGCCATAAGCGACCCTCACGACACTATTCGACAAGTCAGGATGGCGATTGAGATGCTTATGAATGTATCTGTTGTGCCATCTTCAATAATTCAGGCTGCAGTTCCTGCTATCCTATCGGAC…	513	96.47	34.08				0	stalk_contig_1488
37	SQ-RDA_contig_1675	ACCAACGATTGAGTAGCTCTGGCTACGTCTTTTCTGCTTCTTTGCCTCCATATCTTGCAAGTGCCGCAATTACAGCTATTGATGTCCTTGACGAAAATCCCAATATTTTAACAAAGTTGAAGAACAACATTGCTGTGTTACGGAAAGGGTTGTCGGAAATACCGGGCTTCACGATTGCGAGTCATCCAGAGTCACCAATTGTTGGT	206	13.35	4.72				1.46e-20	leaf_contig_546
38	SQ-RDA_contig_3588	TTTTATTTTTGTTTTTTTTTTGTTTTTTTTTGTTGTTTTTTGTTTTTTGTTTATTTTGTTTTTGTTTGTTGTTTTTTGTTTTTTTTGTGTGTTTTTTTTTTTTCAAGCAGAAGACGGCATACGAGATTTCTGCCTGTCTCGTGGGCTCGGAGATGTGTATAAGAGACGTCGACTATCCATGAACAGATCGATAGGCCACGCTTTCACGGTTCGTATTCGTACTGGAAATCAGAATCAAACGAACTTTTACCCTTTTGTTCCACACGAGATTTCTGTTCTCGTTGAGCTCATCTTAGGACACCTGCGTTATCTTTTACCAGATGTGCCGCCCCAGCCAAACTCCCCACCTGACAATGTCTTCCGCCCGGATCATTCAACTTATGCTGAACCTCATACTCG…	533	1604.27	566.77				6.68e-30	root_contig_3206
39	SQ-RDA_contig_359	GACTATCCATGAACAGATCTCGACGTTCTGGAATCAAAACTTGCTTCAGATTCTGCACACACTATAAAGGCTATTTGCATCGTTCATAATGAGACAGCAACTGGAGTCACCAATAACTTGGCCAAAGTTAGACAAATTCTTGATGCATACCAACATCCAGCCCTCCTCCTTGTTGATGGAGTGTCATCCATTTGTGCTCTCGATTTCCGTATGGACGAATGGGGAGTAGATGTGGCCATAACTGGTTCTCAGAAAGCCCTTTCCCTTCCTACTGGGATAGGATTTGTGGTTGCAAGCCCTAAAGCTATCGAAGCTTCAAAATCTGCCAAATCACTTCGAGTTTTCTTTGATTGGGCTGATTACCTGAAATTCTACAAGTTGGGAACTTATTGGCCATAC…	453	148.7	52.53				1.02e-102	leaf_contig_37859
40	SQ-RDA_contig_1096	CATGAACAGATCAGCAAGAAGAATTGGCACAGCTTGTTTTACCTATAAATTGAACCAATCCTAACTGATGTATAACCAAAATTTAATTTACAAATAAATACATTCTGATTACTTGAATTTATTGAAGAAGTTGACTGCGTCATGAAGGGCATGGATAAAGTTGTCGACATCCTCCTTAGTGTTGTAGAAATAGAGGCTAGCACGTGCACTTGCGTTGACTCCTAAATACCGATGGAGGGGTTGGGCACAATGGTGACCCGATCTGTTCATGGA	273	201.42	71.16				1.41e-28	root_contig_3206

## Sheet: Table S7
Table S7. Annotation of transcripts from organs libraries identified as potential transaminases.
No unigenes	Unigenes ID	Nucleotide sequence	Unigene Length	FPKM	Blastx E-value	Blastx accession (E-value)	Function
1	leaf_contig_466	GAGATTACCATAAAAATATACTCAAGCCTTGTATATCTCCAATGCATAAACTGAAAATTTGACAATAATCTCATATGGGTTTAGTTCTTATGATGCAACGGTGAAATATTTACAGGTCTGCATTGAAATTCAAAAGTGTGCAGCATCACAACGTCTTTTCTTTATTATTGAGGAAATACTTCTAATAATATAAGAATTATATAAAACTTTCACCGTGCATTGCCACTCTTTGAGCAGCAGCTCTCAAGGGCATAGTCGTCAACTTCAGAGCAGCCGCTCTTTGGACAGATGGCTACTTCTGCTTCTGAGACTTGAGCTCCTGCACTCTCTCCTCTGTACACTTCAATGCTTTTCCATAGATGGTTATTAATTCGTCAACTTCGTCTGGAGAGATTATAA…	1984	11	0	Vc: GABAT2	transamination
2	stalk_contig_475	CCTTGTATATCTCCAATGCATAAACTGAAAATTTGACAATAATCTCATATGGGTTTAGTTCTTATGATGCAACGGTGAAATATTTACAGGTCTGCATTGAAATTCAAAAGTGTGCAGCATCACAACGTCTTTTCTTTATTATTGAGGAAATACTTCTAATAATATAAGAATTATATAAAACTTTCACCGTGCATTGCCGCTCTTTGAGCAGCAGCTCTCAAGGGCATAGTCGTCAACTTCAGAGCAGCCGCTCTTTGGACAGATGGCTACTTCTGCTTCTGAGACTTGAGCTCCTGCACTCTCTCCTCTGTACACTTCAATGCTTTTCCATAGATGGTTATTAATTCGTCAACTTCGTCTGGAGAGATTATAAATGGAGGTGACATCATTATGGAATCC…	1928	0	0	Vc: GABAT2	transamination
3	root_contig_1753	CAAAGTAGGTCTTTGGGGGAGGAATAACACCTCCAGCTCCCATGATAGGTTCAGCAATGAAGGCAGCAATCGTATCAGGTCCTTCTTTTATGATAAGGCTCTCCAGATTATTGGCTAACCTTGTTGAGAACTCCTCCTCTGTCTCACCTGGTAGATGGAAGCGCCAGTAATGAGGACAATCTGTATGCAATACAAATGGCGCTGGTAGATCAAACTTCTGATGAAGAGCTGGCAAACCGGAAAGACTAGCTGCTATTAGAGTCGACCCATGGTATGACTTATGTCTTGCTATAAATTTCTTCTTGTTTGGCCTTCCCAGTGCATTGTTGTAATACCAAACCAGCTTGACCTGAGAATCATTGGCTTCTGAACCGCTATTAGTGAAGAACACCTTTCCCA…	938	0	0	At: CYP90B1, DWF4	C-22 hydroxylation
4	root_contig_457	CCTTGTATATCTCCAATGCATAAACTGAAAATTTGACAATAATCTCATATGGGTTTAGTTCTTATGATGCAACGGTGAAATATTTACAGGTCTGCATTGAAATTCAAAAGTGTGCAGCATNNCNACGTCTTTTCTTTATTATTGAGGAAATACTTCTAATAATATAAGAATTATATAAAACTTTCACCGTGCATTGCCGCTCTTTGAGCAGCAGCTCTCAAGGGCATAGTCGTCAACTTCAGAGCAGCCGCTCTTTGGACAGATGGCTACTTCTGCTTCTGAGACTTGAGCTCCTGCACTCTCTCCTCTGTACACTTCAATGCTTTTCCATAGATGGTTATTAATTCGTCAACTTCGTCTGGAGAGATTATAAATGGAGGTGACATCATTATGGAATCC…	1928	68.35	0	Vc: GABAT2	transamination
5	root_contig_544	GTCATGATGGATTGAAACTGAAATTATTCGAGTTTTCAAACACAGCTTATGAACTTATTTGGGAAAATAAACCATCAACTACAGAAGCATTAGGAACTTGCTACTTTTGGCACTTCAGTTAAGTTGCTTCATTCTGAGACTGGAGCTGCTCCACTTGCTTCTCTGTACTCTTCAGGGCTTCTCCAAAGATTTGTATTATTTGTTCAATTTCTTCTTCAGATATTGTCAGTGCAGGTGACAACGTTGTGCAATCTCCGATTGGCTCATGAACTATCATCCCGCGTTTTGTGCATTCTGATACAAATATTCCTCCAACCCCCCACTTGTAAGGGAATACATCATTCGGGGACTTGTTCTTAGAAAAGTCGACCCCGAGGATCAAGCCGGTTCCACGAATCT…	1730	0	0	Vc: GABAT2	transamination
6	stalk_contig_1237	CCCGAGTATTGATTTTGCCTGAATTTCCAAACATTGCTTCCAAATAATCAACATCAAGGTCATGATGGATTGAAACTGAAATTATTCGAGTTTTCAAACACAGCTTATGAACTTATTTGGGAAAATAAACCATCAACTACAGAAGCATTAGGAACTTGCTACTTTTGGCACTTCAGTTAAGTTGCTTCATTCTGAGACTGGAGCTGCTCCACTTGCTTCTCTGTACTCTTCAGGGCTTCTCCAAAGATTTGTATTATTTGTTCAATTTCTTCTTCAGATATTGTCAGTGCAGGTGACAACGTTGTGCAATCTCCGATTGGCTCATGAACTATCATCCCGCGTTTTGTGCATTCTGATACAAATATTCCTCCAACCCCCCACTTGTAAGGGAATACATCA…	1220	0	2.56e-170	Vc: GABAT2	transamination
7	leaf_contig_3507	TACTTTGAGAAGATTCAAGCTGTCCTAAAGAAATACGATATTCTCTTCATTGCGGATGAGGTCGTCACTGCCTTCGGAAGGTTAGGGACAATGTTTGGATGTGACAAGTACAACATTCAGCCAGACCTCGTCTCCTTAGCAAAAGCTCTTTCATCTGCTTACATTCCCGTCGGCGCAGTTATCGTTAGCCCAGAAATTTCTGAAGTTATAAATCGTCAAAGCTCCCAAATTGGTACATTTGCTCACGGTTGTACGTTTTCGGGGCATCCAGTGGCCTGCGCTGTTGCTTTGGAGACACTTAAGATTTATAAGGAGAGGAATATTGTTGAGCGCGTCCAGGCTATATCAAAAAGGTTTCAAGATGGCATCAAGGCCTTCTCGGATAGCCCCATTATTGGG…	759	7.57	5.98e-116	Vc: GABAT2	transamination
8	stalk_contig_5999	GGGGATTATATTATTGAATGGTATGGAAGAAAAAAAAATGGTAAAATCAACATACCAAAGGGGGCATGGTGACACGATTGCAGAAGTTGTGGTAAAATGGTAATTTATTTAACTGTGCAGTTGCAGCTTCTATAAGCCGAGGCTCATTTCCACCTAAAGATGTGCACCACAACCCAGCAATAGTATCAAGATATTTCTTTCCATGATTGTCATAAACATAACAACCCTCCGACTTCTCAATGACAACAGGATCCAAGGAGGTGCTCTTCCATCCAGGGGTGAAAGGTGCCAGCATATCATGCCCCTTAAACCCTTTGACTTCAACGGACTTGGTCCCTGCCAAGCATGACCCATTCGCCGCAACTGTCTGTACGCCGGGGCTGGAAGCCGATACAGGCG…	472	0	8.72e-47	Vc: GABAT2	transamination
9	stalk_contig_579	GTTTCCTCGTCATCAACCTAACCCCCATCTCCGCCATGTTCGCGCCGAGAGAACTCTGGCGACGGGGCCTCCGATCTCGGCCGGAGCTCCGGTGGGGACTCCGTCGTGCTCTATCCTCGTCGCCGGCGCCTCCGCCTGAGATCCCTCCGTTCGATCACCAGCCGAAGCCGTACAAGGGGATCTCGGCCGACGAGATTCTCAAGAAGCGGAAACAGTTTCTCGGACCCTCTCTCTTCTACTACTACCAAAATCCACTCAACATTGTTGAAGGGAAGATGCAGTATCTATATGATGAGAAAGGAAAGCGTTACCTTGATGCGTTTGCTGGTATTGTGACGGTCTCTTGTGGGCACTGCCATCCTGATGTGGTGAATGCTATTGTGGAGCAAACTAGAATTC…	1737	0	8.09e-46	Vc: GABAT2	transamination
10	leaf_contig_26246	CCCGAAGCGCCCATGACAGGTTCAGCAATGAAGGCAGCAACCGTATCTGGTTCTTCTTTTAGAATAAGTTTCTCCAAATTATCAGCTAACCTTGACGAAAACTCCTCTTCCGACTCACCTGGTAGATGGTAACGCCAATAGTGTGGACAATCTGAGTGCAATACATTTGGAATTGGCAGATCGAACTTATAATGTAGATGCATAAGGCCCGAGAGACTAGCAGATGCTACTGTAGTTCCATGGAACCTGAGTGTCATTGGCCTCAGAACCACTATTAGTG	280	0	2.15e-42	Vc: GABAT2	transamination
11	root_contig_1166	ACTAGCAGCCCGAGCCCACGCACATCCTTCACATGTGGGTTGTCCCCCAACTTAAGTGTGAGCAGCTCTTTTAAGTAGGCCCCCTTCTTCGCCACACTGGCAAGAAAACCCGGGTCTCGGATCTTGTCCAGCACGGTGAGGGCTGCGTTGCACACGAGGGGCCCGCCAGCAAATGTGCTCCCGTGGTCCCCGAATCTAAGTGCGGCCCCCACCCTTTCGGTCGCGAGGACGACGCCGATGGGTAGGCCTCCCGCGAGGGGTTTGGCGAGGGTCATCATATCCGGTTCCACAGAATAGGCCTCATGGGCCCAAAGGTGACCGGTTCGACCTAACCCGCACTGAACCTCATCGAAAATCAGGAGAGATCCAGAATCGTTACATAGAGCACGCAGTGCTTGT…	1187	230.06	1.13e-41
12	leaf_contig_2234	ATTGGGTTTAGTCATCTTTTGACCTTCGTCTCCTCTAATCGTCACAAAAGCGAGCTCGAGCACTTGCAATGGCTTCTGGGTTTCTCAGCAGTTCGATAACGCCACCAACTGGTCGGAGCTTTCCGATCCGAGCTCAGACTCCGACGATATCCTCGTGCCTCGTTTCGGAACCGCTGAAGAAATTGGCCACCTCCAATCACGGGAAGCCGTTGTCGCTGAAGAGCAAAGAGATCGTCGATACTGAAGGGAGAGTCTTTGTCAGGACCTACGACAGAGCTCCCTTGGTGATCGAGAGAGGGAAGGGATGCAAGCTCTACGATGTCGATGGGGTCGAGTATCTTGACATGACGGCGGGGATCGCAGTGAACTCGCTCGGCCACGGAGACCCGGATTTCGTCA…	990	0	6.25e-30	Vc: GABAT2	transamination
13	stalk_contig_6396	GCATTAGGCCACGTCCTCTCACATCGCCGATGATTTCATGCTTATCTTGGAGAGCTTTGAGTCTGTCTTTCAAGTAAGCCCCCACAACGAATGCATTCTGTTGAAGCTTTTCTCGCTCGAGCACTCGAAGCACCGCGAGCCCTCCAGCAGTGCAGACAGGGTTACCCCCGAAAGTATTGAAATAGCTTCGATGCGTCAAGACCTGAGCGATCTCTGGGGTCGTAACCACTGCACCGATCGGGATCCCATTGCCGATACCCTTCGCCATGGTGACAATGTCGGGCACCACATCATGCCCCTCGAATCCCCAGAAATGACTTCCGGTACGAGAAAAACCCGACTGGACCTCATCAGCTATACAGAGGCCCCCAGCTTTCCTTATGATTTTGTATGCTGCAG…	454	0	1.21e-23	Vc: GABAT2	transamination
14	stalk_contig_11732	GCTCCCTGTATGGCTTCGGAGATAAAACCAGCAATTCGACCTGAGGTTCCGAAATCGATGATATCTTGGACGTCCCGCGCATATTTCTCTCCATCTGAACCGAAAACACCTCTATACTGATCCGGGTTTAGTGCATGGTGAACCCCGCTCTGCAAGAGATTAAACTTCCAGTTACTTTGAGCAGTTGCACCCATTGTTGCAGCTGCATTACCATGATATGCATTTCTGATTGATATTATATCATGACAACCAGTATAGAGACGAGCAATCATCATGGCTAGTTCATTTGCTTCTGTACCAGAATTCGTAAAAAAGACAACCTTGAG	326	0	2.04e-08	Vc: GABAT2	transamination
15	stalk_contig_18669	GATTGATCCACTTTTCCAGAGAATCCTTGTAAAGGAGTGCCGCATCCGTAAAATTCCAGTCATATTTGACGAAGTCTTTACAGGATTCTGGCGTCTTGGAAGAGAGTCTGCTGCTGAGCTCCTAGGTTGTTTCCCGGATGTGGCATGTTTTGGAAAACTAATGACCGGAGGTATTATACCTTTGGCAGTGACTTTAACAACTGAAGCTGTTTTTGAAGCATTTAAAGGGGACTCAAAGCTCATGGCCCTATTCCATGAGATCGGAAGAGCGTC	273	0	5.6e-07
16	root_contig_11985	AGCACAAGCACCATCATTATACACAGGTTTTTTACAGCAGCCATGGTATTGTCTATGAGCCTGCACTGCACTGTGCAGAACTTTTGCTCGAAGGGGTCGGAAAAGGTTGGGCTTCTCGAACCTTCTATTCTGATAATGGATCTACGGCAGTTGAAATTGCACTTAAAATGGCATTCCGTAAATATTCATTCAGTCATGGGATTTATCTGAATTTTGACAATGGAATCGTTAACCAAGTCATTGACTTCAAGGTTCTTGCCCTCAAAGGATCTTATCATGGT	281	0	0.000364	Vc: GABAT2	transamination
17	leaf_contig_33720	GGCCTATTCTGTGGAACCGGATATGATGACCCTCGCCAAACCCCTCGCGGGAGGCCTACCCATCGGCGTCGTCCTCACGACCGAAAGGGTGGGGGCCGCACTTAGATTCGGGGACCACGGGAGCACATTTGCTGGCGGGCCCCTCGTGTGCAACGCAGCCCTCACCGTGCTGGACAAGATCCGAGACCCGGGTTTTCTCGCCAGCGTAGCGAAGAAGGGGGCCTACTTGAAAGAGCTGCTCACACCTAAGTTGGG	255	0
18	leaf_contig_3049	CAGCTTTAGCATTTTATTTCTATCCACTAAATGTTAGGGTTCTATAATTTCATGATCAGCAAACAAAACCCTAACATCATGATCGCATTATAACATAAACTTTAGCATCAAAAGTCGAGATTTCTCCGTCAACAGAGAGAGAGAGAGTCCTGACCTGTCGGAGGTGGGCAGCGGGGTAGACGACCCCGCAGGGGTTGTTAGGGTTGATGATGACGATGGCGGAGGTGGCGGAATCTGCGAGTGACCGGATCTGATCGAGGTCAACCTGCCATCCCCGGTGAGGGAGGAGGTCGTAGTGGCGGACCTCGACGCCGTTGAGCTCGCACGCCGACTCGTACGGCGGGAATCCAGGTCGCGGGAGAAGCACGTTGCTTCCCGCCGCCGCCACAACCGTGACGC…	825	19.67
19	leaf_contig_661	ATGAACAATGTCCTTATTTAACTTTCCACCAACAAACTTTTCATTACAATCTCAATTCTCATGCTGAACTGTTCAAACAAGATGAGCTCGATAGAATCCAAACTAATGGAAGCTGAAAGAAGTGATTGCAACACTGGGGAAAGAGGTCACATTTGCTCTCATTTGTAGAGCTGTTTCAATCTGCTGCAAGCTTCAAGAACATTTCCCCGATGGCCGAAGGCGCTCACCCTGACAAACCCCTCGCCCCCGGGACCGAAACCACTGCCTGGCGTCGTGACGAGGTGCGCCTTCTCAAGGATCTCAGAAAACACATCCCACGAGCTTCTACCCGGAAAGTGCACCCATACATAGGGGGCATTCTTCCCCCCGTATACATTGAATCCAAGTGAGGTGAAAGTG…	1690	13.19
20	leaf_contig_1840	ATAAACATCTGCTCATATTTGTGTGTATAAAGAGAAAATACACCTACTACAACTGTCTTTCAACTTCCAGTTGAGAGACTACTTGCATCATTGGACTCACCTCTTTTGCTCCAGGAATTTCAAAGATAGATCGTGGGCTGTCATCTGATATATACATGGCATAGGCGGAATCATAGACTATGATGGATCCATTATCCTTCGCAAATTGCACCAGTTGTTTCAATTGGTCTCTGGATGCTGCAGAACCGGTTGGGTTGTTTGGCGAACAGAAGAAGATGGCATCTGCTCTCGGAACTGTTGATAAATCAGGAAAGAAACCATTCTCCGGGGAGCATCTCATGTACTCAATGTTCCCATATTTCTCGATGTCAGTTTCGTATAAACCAGTTTGACCCATAA…	1088	13.19
21	2_leaf_contig_4464	TCCGTTGGGTATGCAATATATCCCACGCGCCATCCCATCATCCCGTAGGCTTTGGAGAAGGAGAAGACGTTGAGTATGTGGCTACCCTCTATGCATGTATGTTTCAATCCGTCATACATGAAGTATTCATAGGTATTATCTACAACAAGCCATGCGCCAGCACTTCTACATATATCTGAAATTTTCTGGAGGATTGGCTCAGGGATATAAGCCCCAGATGGGTTTCCAGGATTTACAACAGTGACAAGCTTGGGAACCGGTTTACCATCTTCCACCGATAGAGTCTTTTCTAACCAGTCTATCTCTGGTTGAAGTGTCTTGGGATTGCTAGGGCCAACCAGTATGTTAGTAATGCCTGTCATCTGGAAGGACATGAATGCGTTGAAGTAATATGGAGCA…	658	7.59
22	2_root_contig_1248	TATAGTCATGAATCTCAATTGGCAAATGTATTATTATCAGTTAAAAACAGTTACTCCTGCTGCACCATCCCATATCTCAGCAGCTCTTCCAACCCCCTCCTCAGCCTCTGAGCAGCGACCTCGCAGTCGGCGTCCTTCAGCCCTCCAAAGGATATCCGGATGTATCCGGGCCCACCGCTGGCGCTCCCCGGGATCACCACCACCCCATGCCGCCTTACGAGCCACCGGACGACCTCGAAATCGTCGGAACACTTATCGGGAAGCTTAGCCCAGAGGTAGATGGCCCCTTCCCCGCCCTTGACGGCGTCTTCTCCGAGTGGGGCCAGAGCTTTCACGAGCAACTCCCGGTTCTTCACGAGGTTCTGCACCCTTTCTCTGATCCACTCTGGCCCGACCTCC…	1150	0
23	leaf_contig_10396	GGGTGGTTTTTTGGTTTTTGTTGCTACTTATGGTGCTAAAGATAAATTATATGGTTGTTTTGCTCGCCATAAATACTCAATGATACTAAGAGGAAATGCCCCGTATCCCACTCGAAGCCCAGCTAAGCCTGCCCTTTTACTAAATGTACGGAGGACAATTAAGTTCTCATGCTCCTTGACCCATTCCATCCTTGATTTCACACCAGAGAATTCAATATATGCTTCATCCAGCACAACTAATATCGGTAGGTGTAGAATCTTTAAGAGAATTTCGTCATCGATTATACTTCCATCCGGATTGTTTGGTGAAGTCAAGAAAATGCATTTTGGCTTTTCCTTTTCCACAACTTCAACAATTCCAGGTAAATTCAGAGAAAAATCTGGATTCCTTGGAACTTT…	418	0
24	leaf_contig_8157	AGAGAATTTAATATATGATTCATCCAGCACAACTAATATAGGTAGATTGAGAATCTTTAAGAGAACTTCATCGTCAATTATACTTCAATCCGGTTTGTTTGGTGAAGTCAAAAAAATACATTTCGGATTTTCCTGCTCCACAGCTTCAACAATTCCAGGTACATTCAGAGTGAAATCCGGATTTCTTGAAACCTTGATGACCAGAGCCCCATTTACTGCAGCATCGAACTCATACATTGTAAACGTTGGAGGACAGTCCACAATTTTGTCACCTGGATCAAGCACGCATCTCATGATTAAATCAATTAGCTCATCTGCACCACATCCAACAAGTATGTAATCAGATTCAAGGCCTGAATCTTGAGCAAGAGCAGTACGTAAGCGGCGACTCTCAGGGTC…	472	0
25	leaf_contig_1708	ATAAACATCTGCTCATATTTGTGTGTATAAAGAGAAAATACACCTACTACAACTGTCTTTCAACTTCCAGTTGAGAGACTACTTGCATCATTGGACTCACCTCTTTTGCTCCAGGAATTTCAAAGATAGATCGTGGGCTGTCATCTGATATATACATGGCATAGGCGGAATCATAGACTATGATGGATCCATTATCCTTCGCAAATTGCACCAGTTGTTTCAATTGGTCTCTGGATGCTGCAGAACCGGTTGGGTTGTTTGGCGAACAGAAGAAGATGGCATCTGCTCTCGGAACTGTTGATAAATCAGGAAAGAAACCATTCTCCGGGGAGCATCTCATGTACTCAATGTTCCCATATTTCTCGATGTCAGTTTCGTATAAACCAGTTTGACCCATAA…	1131	13.19
26	leaf_contig_504	GAGAGAGAGAGTCATGGCGGCATCTCGGATCTTGATCCCGAGCACGAACCCGAAGAAGCGCGGACCCAAGGAGATGGACGGGGACGACGACGACTGGACGGTGGCGAAGCGTTCTCCGGCGGTGGCGAACGGCGGCGTTTGGGATCCGGCGCAGTCGCTGGCGAGCGCTCGGCACGAGTTCGGCGAGCACGGAGGGGTGAACATGTCGATCGAGGCGTCGGCGACGTTCACGGTGATGGAGCCGGACACGATGCGGCGGATGTTCGCCGGAGAGCTCGGCCCCGACCGGGATTTCTTCATCTACAGCCGCCACTTCAACCCCACCGTCCTCAACCTCGGCCGGCAGATGGCGGCGCTCGAGGGGACCGAGGCCGCCTACTGCACCGCCAGCGGGATGTC…	1909	57.44
27	leaf_contig_546	AGGACATTGTCAGGTGGGGAGCTTCAAAAACCATGAACACCAACATCTGTACCTTTAAAATGTATATAACAGAAGTAGAACTGTATATAATACATTGCCTAACAACATCACAAAATAAACACCATTATTTGATGGACAAAGAAAAACCCTAGCTTACGAATTCCTCGGGCCTCGGCAAACCCGAAACCTCAGAGCTGCTCGGAGAGCACCGAACTTGCGACCCTCTTCAAAGAGTCGGAGGCTTTCAACAGGTCGTCCTCCGAATGTCCTGCCGATACAAACAAGCGGATGCCTGGCGGGAGCTTGCATTTGTCGAGGGTCGACTTCTTCGAGGTCACAATGAAGACTGAATCTTCCCTCAAGGCCCTGACAGCTATATTATCGAGGAGCTCGAGATCG…	1833	6.01
28	leaf_contig_6370	AGGCAATCCATTTTGCAGCAGAATTCAGCAATCGCTTCAAGCTCTTCCAGGCTGAAAACCTTCCCTGTTGGGTTGTGTGGACTGTTCAAAATCAAAGCTTTTGTCCGATCTGTAAATGATTTCATGAGCGTCGCCAAATTCAAAGTCCAGTAAGGTGGATCCAATGCAACGTATACATTGTGAAAGGTCATAGAAATCATCCTCCAGCATAAAAATTTGGTCAGCAATGGTTCCACTCAACTAGAACACCCAGGAATACCTCCAGTCAAACGGATGCATGTTTCATATGTTTCATAAGCAGGATCAAATAACAAGACTTCATCACCTTCATCTATTGTTGCAAATATTGTTGCTGCAAATGCCTCAGTCTGTCCACAGCAAATGACAATATCCGTATGA…	539	7.61
29	leaf_contig_41870	GTGTGCTCTTCCGATCTGGCAAAACTGAGTGAAAAGTCAAGGTTGTTGATCCTTTGCTCACCATCCAACCCTACGGGATCTGTTTATCCTAAGGAACTACTTCAAGAGATTGCTGAAATTGTTGCACGATTCCCCCGGCTTTTGGTTGTATCGGATGAGATCTACGAACATATCATTTACTCACCAGCAAGTCACACTAGCTTTGCATCTTTGCCAGGCATGTGGGAGAG	230	0
30	leaf_contig_12539	CTTTATTAAACCGAACGAAATCGACAATGAAACCAACTTAAAAAAAACCTTGGCCTTAATATACATCAAGTTGAATATATGAACAAGAATAAATGATTGATATTCTAACACGAGATAAAAGATTAATTGTGTAAAATCATCGCAATTATAGGGTGTTTTCTACCCATACTTGTCGAATAGTGTCGTGAGGGTCGCTTATGGCTAGCCATCCAAGGCGCCACCCAGGAACCATCCAACGCTTTGAGAGTGCTCCTATGGTGATAACTGGTGCCAGGTGAGCAAAAGAGGCCATCTGCACAAATTTGCTTCCCCCAAAGGCCATATGTTCATATATCTCATCAGCAACGATAGGGACACCCAACTCTCCAGCAGTTTCAGCAAT	382	19.67
31	leaf_contig_1067	ATAAAATGTTGCTACCAAAATTCATGTCTTATATGATAACCATAAGAACTATTTCAGGTTTTCACACACCAATCCGCTGCATCAGGATGTATTCCAAAGTGTGGCACGATTTGAAGGAGAAGTGGTTGCCATGACAGCTACGTTACTCGGCAGTAGAGAAAATACTTCTGGTGGACAGATCTGTGGCAACATGACATCTGGGGGGACTGAAAGTATACTTCTGGCTGTTAAATCATCACGTGATTATATGAGAGCAAAAAAAGGGATCATAAAACCTGAAATGATACTTCCTGTGTCTGCACATTCGGCATACGATAAGGCTGCCCAATATTTTAATATTAAGGTGTGGCGTGTTCCTGTAAATAAAGAATTTGTTGCGGATGTGAATGGAATCAAGCG…	1395	59.12
32	leaf_contig_4909	GCCTTAGTAATGTTGCTGCTTCCATAAAGTGTACAAACATAAGTTCCATTGTCGTGCTTTAATGCCAACATAATGGTCCTCACATAAGTTGCAAGAGCCGATGTATGCCGAGCAATTGCAGATACTGTTAAGGTCTCGATTATCCTAAATCCATGACGAATGGAAGCTATGCTCAAAAATGACTGGGTGCCATCTTCAAGCAACTGTTCAATGCTTTCCCTTCTCTTTACAAAGTCAGCATCAGCTATAGAAGCAGAAACTGTGCCTCCACTGAAAAATCTCTTATTCAAAATACTGCCTGCCTCATTCCGTACAATAAGAGCTCCAAGCCCAGTTGGATAACCAAAAATCTTGTAGAAAGAAAAAACAACAAAATCAGCAGGATATCTAGCTAGATCT…	621	11.81
33	leaf_contig_6428	CGACGCTCTTCCGATCTACTCACTTCATCTCTCTCGCTCGCTTTCCCCAAACTCAGCGGCAACCCGGCCATCGCCATGCTCGAGCACATATCAGGCGGAGCCCCAAGGCAGGTCCCCACGACTCCGCAAGCATCTCCCCCATCTCGACCACCCGCTCGTGGTTGCGTTTCCGGATCCCTGCGATCCCGCCCTCGAACCGGTCGGTGAATTCGGCGGCGGACGGGACGACGAGCTGGGCGCTGTAGTCGCGGGTCCCGATCCATCCGCTCTCGATGGCGAGGCCGTTGCCGTACTCGTGGGAGACGACGGGGTGGTGGAGGTCGGCGGAGGCTGGGGACTCATTGCGGCAGTAGAGGAGCGCGACGGAGGGGGGGCAGAAGAACCACTTGTGGAGGTTGG…	536	7.63
34	leaf_contig_37859	ATCGGGACGGGTGACTGGAGTTCACGTGGCTCTTCCGATCTCCAACATCCAGCCCTCCTCCTTGTTGATGGAGTGTCATCCATTTGTGCTCTCGATTTCCGTATGGACGAATGGGGAGTAGATGTGGCCATAACTGGTTCTCAGAAAGCCCTTTCCCTTCCTACTGGGATAGGATTTGTGGTTGCAAGCCCTAAAGCTATCGAAGCTTCAAAATCTGCCAAATCACTTCGAGTTTTCTTTGA	242	0
35	leaf_contig_5101	AGAAATGGAGCAAGCAAAAAAGGAATTTTTGATTCAATTCGGTGAAGACTACGGCTACCCCAATGCTCCCAAGGGCGTCGACGAGATCCGAGCTACGGAATTCAAGCGGTTGGAAGGACTAGTTTACCTGGATCACGCTGGAGCTACCCTGTACTCTGAATCCCAGATAGAAGCCGTCGCCAAAGACCTTAGTTTTAATGTTTATGGGAACCCTCATAGCCAAAGTGAATCGAGTATGGCTACATCTGACATCATAAGTTCGGCGAGGCAACAGGTCCTTGACTATTTTAATGCATCTCCAAAGGAATACAAGTGCATATTTACATCTGGGGCAACAGCAGCTCTGAAACTTGTTGGAGAAACATTTCCTTGGAGTAGAGAAAGCTGTTACATGTACAC…	608	12.2		Vc: GABAT2	transamination
36	stalk_contig_17811	TACAAGCATAGTGACATGGTTCATCTCAACGTTCTTCTCTCATGTTGCACGATGGAGAAGAAAGTTGTTATCAGTGATAGCCTCTTTAGTATGGATGGAGATTTTGCTCCATTGGTGGAACTTGTGGAGCTCCGGAAGAAGCATAGATTTTTGCTCGTCATTGATGATGCTCATGCAACACTTGTTTGTGGTGAGAATGGTGGTGGTGTACCTGAAATCTACAAATGTGAGAATGAGGTTGATATATGCATAGGCACTCTGAGCAAGGCTGCAGGTTG	278	0
37	stalk_contig_2451	CAATGGCGCCCGCAACTGAGCAGATGAACGGAGGAGGAGGAGGGTACAATACAGATACAGATACAGATACAACAGCGTGGAAGGGGAAGGGGGTGAGGTGTAACCCATGCTTGACGTCGGAGGGAAAGTCGACGATAAGGGGGACGGTGGCGGAGCTGATGGCGGCGGCCAACGGAGAGAAGCCGTTGATATCCCTCGGGGTGGGGGACGCCTCCGCCTATCSCTGCTTCCGCAATGGGACGCAAGCCTTCTCTCGGGCGGTAGCCCGAGCCGTCTCCTCCGGCGACCACGACTGCTACGCCCCCTCCTTCGGTCTCCCCTCAGCCCGCAGGGCGGTGGCGGATCACCTATCCAAAGGTTTGAACCGGCGGCTGAGGGATTCGGACGTTTTCCTAACGG…	825	0
38	stalk_contig_2474	AGGCCCCAATTTGCTTCCTCTTCTAAATAGTATGGAACAAGAGTACCACCATACAAGGATATTGCAGCTGAATAAAGAGGATATTGTGGAACTGGAACCAAAATCCCATCCTTCTCATTTCTGATAATAGTATTTAGAATCTGCATCACACCTTTGCTAGCACCATCAGTTAGATATATGAGTTCTGGATCACTCGGATACCCATCACGCCTTTCAATGAAATCAGCGATTTCCTTCCTGATTCCAGGGAGACCTCGAGAATCACTATATGCACCTAAACCACCAGAAGTCATCGAAAGATAATGTTTAGCTCTTGCAATGGCATCAGCTGGGAACATAAGTCCCACATTAGGATCATCTAACAAAAAAGGAGCTTGGCATAATGCTACCACCTGACGA…	821	0
39	stalk_contig_687	ATTTTTTTGACTAAGCAGTACACTCTCTCTAGGGTCTTCACCTGCGCCAATGCCCTAACTTGCGTCAATGCCCAAACGCCGGAGGCCCGGGCCGAGTGTGCCGAAGGCACGCGAGGCACGGCCTAAGCCCGCGAGATGAACTAGTAAATATACATTCTTTTACGGTAACAAGTTTGCATCTCCTGCTGAACTACTAAAAGAGACTTTGCAACTGTTTTATTTCCATGTTTAGTTCTTGGAGCACATTAGGTTGGATGATCCATCATGCTGGTTGACCATCCCAAGGGCCTTCTCGAACTGGGCCCACCTCTGCTCGAGGGTCCCGCTGTACCCGACCGACATCCGTATCAGGCCCGGCGCGATCCCGGCGAGGTCCTTGTCCTGCTGGCTCAACTCGCT…	1617	0
40	stalk_contig_517	GCCCTAATTTCAAACCCTAGATCGCGCTCGACTTCGAGTTCTTCGACCTCCACCTTCGGCTTCGCTGCGTGTCCGCCTGTGGCGACTCCTCCCTTGACCCCGTCCTCCGGAAGCTCCGATCCTGAGTCCTGACTAGAAGCCTAGCTCGGTGAGGCAGCAGGCTTCGGTTTCATAAGTGGAGAATATGTTTTCAGCCATGCAGATATCTGCCGCGATCTCCTCAAACTCCTCAGCGATCTTTGGTCAGAGCAGCTTCGATATCAGGAGATCAAAGTCCTCCAATCAAGGGAGGAAGTATGGGATTTGTAGATGCGTTGCGACTCCTACCACCGAGAAAGCCGCTTACAAGACAAAGGTTCCTCGCAATGCAAATATGGCAAAACTTCAAGCTGGTTATTT…	1815	0
41	stalk_contig_5317	GTTCAAAATCAAAGCTTTTGTCCGATCTGTAAATGATTTCATGAGCGTCGCCAAATTCAAAGTCCAGTAAGGTGGATCCAATGCAACGTATACAGGAATACCTCCAGTCAAACGGATGCATGTTTCATATGTTTCATAAGCAGGATCAAATAACAAGACTTCATCACCTTCATCTATTGTTGCAAATATTGTTGCTGCATATGCCTCAGTCTGTCCACAGCAAATGACAATATCCGTATGTGGATTTAAATCAAGACCGTGATTTTGCTTCATCATTGTCGCCAAGAGGTCACAAGTACCTTGCACATGCCTGTACTGGTTGAGGTCTGCGTTAATGGCGGAGACGGCAGCTTCCTTGATGCTAAGAGGAGCGGGGAAATCGGGGAAACCTTCGGCCAG…	508	0
42	stalk_contig_581	GCGGCGTTACTGTTTTGGCGTTGACCCCTGCAGGTTTATTTTTTTATACAAGGCACAACGACTGTGAGGGAAAGTTCGTTCTATGGTGTCCATACCGGGATTCGGTATCTCCACTTTATTCTATTGGAATCACATGATATTCTTAAATACTTGATACAACAATAATCAGGCACTGTGGGGGACTTCGAACTCAGAATTCAGGCCAAGACGGGTGCACTTGGTTTGACAAGAAGCATTGCCCCCTTTATTTTTTTGACCGCCTCCTCCAATGTATGGAGCGACGCTGCATAGGAGATCCGGATGCACTTATCGTCACCAAATGCATCCCCAGGGACGAGCGCCACCTGAGCCTTATCCAGCAGAAACCTGCAGAGAGACTCTGAATCCTTGATGGGCCCA…	1737	0
43	stalk_contig_27206	ATCTAGATGAAGCAACTGGTTGGGGGCTGGAAATATCTGAGCTCAAGAAGCAGTTGCAAGATGCCAAGTCCAAGGGCATCAGTGTTAGGGCTTTAGTTGTTATAAATCCCGGCAATCCAACAGGGCAGGTTCTTGCTGAGGAAAATCAACGGGCTATAGTAGAATTTTGCAAGCAAGAAGGTTTGGTTCTTTTGGCTGATGAGGTATATCAAGAAAATGTTTATGTTCCTG	231	0
44	stalk_contig_25649	GCCCGAGTAGATCTCGTCGGAGATGAGGTGGATGTTCTTGCGCGCGACGAAGTCGAGGACTAGTTCGAGGACCGGTTTCGGGACCGCCGTGCCGAGCGGGTTCGACGGGTTGGTCAGGAGCACTCCCCTGACTCGGGTGTTGGAGGCGGCGGCTTCGGCGAACGCGGATTCGAGGGATTCGAGGGTGATCTGGAATTCGCTGGAGCTGTCGCAGTGGATCGGGACGATGTTCACGCCGG	239	0
45	stalk_contig_694	GCCAAAATTTCAATCAGCCTCGGCTAATATTTGCCTGTGGCGATCCTTCTCATTTCGCCATGCAATCAGACCGGAGGCCCGTGCCGAGTGTGCCGAAGGCACGCGAGGCACGGCCTAAGCCCGCGAGATGAACTAGTAAATATACATTCTTTTACGGTAACAAGTTTGCATCTCCTGCTGAACTACTAAAAGAGACTTTGCAACTGTTTTATTTCCATGTTTAGTTCTTGGAGCACATTAGGTTGGATGATCCATCATGCTGGTTGACCATCCCAAGGGCCTTCTCGAACTGGGCCCACCTCTGCTCGAGGGTCCCGCTGTACCCGACCGACATCCGTATCAGGCCCGGCGCGATCCCGGCGAGGTCCTTGTCCTGCTGGCTCAACTCGCTGCTCGTGC…	1609	0
46	stalk_contig_524	GCTGAAAGTTTCATCATAAACATCAAAAAAAAGGTTCACAATCAAAAGTTAAGTTTTTAAGGAAATACAGAGAGAATATTACAAGGGCAATGGAACTAGTTTCAACGGCAAACACCAAAAGACAACATGACGAACATCTGAAACAAATGTTGGCTGCAGACCATACTGCTGCAATAGCTGATTTTACATAATATTGAAACAAAATCTGCTGATTATGTGTGGATGGAGCTCTTTTTCGCCTGATGAACAATCTGTTGGTTTCTTCAAATCTATGAGAGGTACATCGTCATGGTTCTTAATTGAGCTTCTTCAGTTCGTTCTTCAGCTCGGGCTCCTGTGATTCTACAGGGAAGTACTTGATCCCCACAAGATCCCCAACTTTGCTGATGACCTCCAAGG…	1807	0
47	stalk_contig_10211	GGTTGCCACGGTTCAATGCTTATCAGGTACTGGCTCATTGAGGGTTGGAGGAGAATTTCTGGCCAGGCATTATCACGAAGTAAAGAGTTAAACCTTTTTGATTCATTTTTTCGTTTTGTAACTTGTAATAATTAGAATGAATATGTTGCTTGAACTGCAATCTTTTCCTACAGCGCACTATTTACATTCCCCAGCCAACATGGGGAAACCATCCAAAGGTGTTTACATTAGCAGGGCTGGCTGTTAAGTCTTATCGTTATTATGATCCAGCAACACGAGGGCTGAACTTTCAAGGTCTTCTAGACGATCTCAGTTCTGTCCCTTCAGGAGCAATAGTGCTTCTTCATGCA	350	0
48	1_stalk_contig_356	GTTGAAAGGAGCACGATCAAAGTCCGATCTGCCCTAGGAATCATGATTCGATCTTGGGTTTGTTGATCTCTCTAGGTTTCTCTCTCTCCATCAAAGCTCCCTCAGAGCTCCAAGGTCCTGGCTAACACTTGATTTGGGAACTACCTAAATACAAAAAGGTCTAATTGGGTTGAAACGATTATCACCAAATCATCTATCTCATTACTGGTTGACACATGCTTGCCTTTTCGGTGTAAAATGAGATTAAAGGTCATCGAGGTCTTCGATTTCATCATGATTGTGGGCTTCATTTTGGGTTTTACCAAGTGAAGTAAAAACACCGAATTCTCTGATATCATTTCTTTACTTCAGCATATGAGTACCAATTGCATGTGTTATGGTTTTAATTTTGTCTTTATG…	2239	0
49	1_root_contig_63	GTTGAAAGGAGCACGATCAAAGTCCGATCTGCCCTAGGAATCATGATTCGATCTTGGGTTTGTTGATCTCTCTAGGTTTCTCTCTCTCCATCAAAGCTCCCTCAGAGCTCCAAGGTCCTGGCTAACACTTGATTTGGGAACTACCTAAATACAAAAAGGTCTAATTGGGTTGAAACGATTATCACCAAATCATCTATCTCATTACTGGTTGACACATGCTTGCCTTTTCGGTGTAAAATGAGATTAAAGGTCATCGAGGTCTTCGATTTCATCATGATTGTGGGCTTCATTTTGGGTTTTACCAAGTGAAGTAAAAACACCGAATTCTCTGATATCATTTCTTTACTTCAGCATATGAGTACCAATTGCATGTGTTATGGTTTTAATTTTGTCTTTATG…	2239	66.05
50	stalk_contig_1488	GGGGGACGCAGGCGCTGCAGGTGTGCGTCTCGGTTGTGGCGGCGGCGGGAAGCAACGTGCTTCTCCCGCGACCTGGATTCCCGCCGTACGAGTCGGCGTGCGAGCTCAACGGCGTCGAGGTCCGCCACTACGACCTCCTCCCTCACCGGGGATGGCAGGTTGACCTCGATCAGATCCGGTCACTCGCAGATTCCGCCACCTCCGCCATCGTCATCATCAACCCTAACAACCCCTGCGGGGTCGTCTACCCCGCTGCCCACCTCCGACAGATTGCTGAAACTGCTGGAGAGTTGGGTGTCCCTATCGTTGCTGATGAGATATATGAACATATGGCCTTTGGGGGAAGCAAATTTGTGCAGATGGCCTCTTTTGCTCACCTGGCACCAGTTATCACCATAG…	1110	0
51	stalk_contig_22118	CACCTGCCTCGGTGCTGACCCAGCGTCTGCTTGTTGCGATGCTCTCGGATTCAGAATTCATCGAGAAATACATGAAAGATAACAGAGAGAGGCTCCGGAGGATGCACATGCTTTTTGTTGACGGGTTGAAGCAGCTGGGGGTCGAGTGCGCCGTAAGCGATGGCAGCTTTTATTGCTGGGCGGATTTGGGTAAATTTCTCCGGTCGTATACGGAGAAGGGGGAGCTCGAGCTATGGGAGAAGCTAATGAATGAGGG	256	0
52	stalk_contig_10684	GCCAGCTCATACGCATCAGTAGCTTTTGCACTCAAATAATGGATCCCGCGATGAACATTCGAATTATAGGATTCGTAGTACTCGTTTATCGCATTCAGAACAGCAGACGGTTTCTGAGAAGTCGCGGCATTGTCCAGGTAGACTAGATTGGATCCATTAACAACCTGATGAAGAATGGGGAAATCGGGCCGAGTGATGTCACCGAGAGAAAGGGATTCCGATTCTACGGAGGAGGCGGGAGAGATCGAGGTGGAGCTGATCGAGGAGGAATAGGATCTCCGGAATTTTGAGCTACGTCTGCTGCAATTAGGGTTTCGGTTAGGGTTAGGAGTTGAAGGTTTG	342	0
53	stalk_contig_1472	CCCCAATGCTCCCAAGGGCGTCGACGAGATCCGAGCTACGGAATTCAAGCGGTTGGAAGGACTAGTTTACCTGGATCACGCTGGAGCTACCCTGTACTCTGAATCCCAGATAGAAGCCGTCGCCAAAGACCTTAGTTTTAATGTTTATGGGAACCCTCATAGCCAAAGTGAATCGAGTATGGCTACATCTGACATCATAAGTTCGGCGAGGCAACAGGTCCTTGACTATTTTAATGCATCTCCAAAGGAATACAAGTGCATATTTACATCTGGGGCAACAGCAGCTCTGAAACTTGTTGGAGAAACATTTCCTTGGAGTAGAGAAAGCTGTTACATGTACACGATGGAGAATCATAACAGTGTTCTCGGGATTAGAGAATCATCAAGGAAGATGCTGGC…	1118	0
54	stalk_contig_752	TGTGATATTCATTCGGCTTCTATCGCGAAAGTAAGCACCACATTAAATAGAAACATTTCTCCATATAAGGCCCACAAAATAGAAGGATTATACATCAAAAGACATAGAAGAATGGAGATGAACCTGGACGAACAGCAAACCCAAGCTCCAGCAGAATCAAAGATCCCATTGCTTCCCCTTCTCCATTAACACAAAGATCCGAGCTTTTTACATTGTCCTCAATGCTGAGACCACTGGATGCTCTTGATATTGATCCCTTCCTTCACCATTTCATATAGCGGACTCATCTCCCTCAGCTTCTCAACCTGACGCACCGTCAAATCCACGGCCCGATCGATCTCAGCCTCGGTGGTGAACCTCCCGATCCCAAACCGGATCGAGGTGTGGGCCATATCCTCG…	1558	5.4
55	stalk_contig_931	AAAAGTTTGATCATTTTACAAAATGTAAAAACTTATAAAAACGGTTGCACTGGACTCGCATTTGTTTCTCATCATGAGTTGCGAGTACCATATCTATTCCATTGTCACAATGTACACCAACTGTAATACATGTTGAAACAAATCTGCATGTGAGATCCATTTCTTGTATAATTTTAACAAGATCCATCCATGAACTCTATCAGTAACTCACGCACCATCCCCCTATCAGGCATCTTCCCTGCAGCGCCATACACTGGGGCGAGGCCTCCACTGACCGGGCCGGGATTTTCTTTCACGGTTCGTACAGACTCCCTCAGATCCTTCACGAACTCCTCATGGACAGGAACATGTTGAAGGGTCACGCATATATGAATGCTGTTCGGCCTCTGCAAGGGATTC…	1396	0
56	stalk_contig_3750	TCGCGGCCACCTCTATAAATTGTTCATCAATAATTACGAGGTGTCATTTACAGGGCATGTAAGGAAAAAACTGTAAAGAGTTGCTTATTGATAGGAGTTGAAGAAGTTGATAGTATCTTTAAGTGCTTGAATAAAAACATCCACYTCTTCTTTAGTGTTGTAGAAATGAAGGCTCGCACGCGCACTTGAATTTACACCCAAGTAACGATGGAGAGGTTGAGCACAATGATGACCCGATCGAATAGCCACTCCATGCTGTTCATCAAGAAAAGTTGCAATATCCGTTGGATGAATGTTCTCAACATTAAATGAACAAAGGGCTGCATGATGGACTGWTTCTGAAGGACTGGGACCATAGATGCGCACATTGGGGATAGATTGAAGGCTGTAATAGAGATA…	634	0		Vc: GABAT2	transamination
57	root_contig_3076	GCCAAGGTCAGGAGGTAGAGGAGGTAACAAAGGCATACCCTTTTCGAAAAAGAGCATTGGAGACTGAATGGGGTCAAATTTTGAAGGAGCATACCACCTGATGCAGCATGCATGAATTGTACTCAGGGCGGAAGGTGCGTCCAACAATGTATTGCACATTTAGATAAATTAACTAACTACTTGCTAACAGCTAGTCGATCTATCATCGGAGGATTCGCGCAGAGCGGCGACATATCATCTCCAGAAATTAATTTTGCACTCAGATGTTTGAAGTCGGCCAATCCAGTGATAGGGATGTACTCTTTGACGCGAGACCTGTCATTGACAAGGAGCTGCTCAGCTTGTCTCACCACGTTCAAAACAAGGGGTTTTCCTTCCTCTGTTCTATAGGCACCGACG…	651	57.58
58	root_contig_12689	GCAGCCTCGAGGAAGCAGCTGGAGGAGCTGGTCAGTTTCGCATAGAGGAACGGATCGGTTATCGTGTACGATTCAGCGTATTCTTCGTATATATCAGACGGCAGCCCGAGATCCATCTATGAGATCCCTGGATCCAGAGAGGTCGCGATCGAGATCTCGTCCTTCTCCAAATTCGCGGGTTTCACCGGCGTCCGCCTCGGCTGGACGGTGGTCCCCGATGAGCTCCTCTACTCCGACAGGTCCTCCGTCGTGAAAGACTTCGACAGATCGGAAG	274	0
59	root_contig_15164	AGCAGCTGGTTTTCCAACAAACCGAGCGACCAATTGCTCCAGCTCGGTGTGCAATTTGGTGGTGCCCCCATCTACACGAACGCTACAGGTAGTTGGCGAGTATTTTTTCAGAGCCTCAATAACACGGGGTGTGCAGTACTCGTCTGCTGCTGCAAACCCAAGGTAGTTGTACGAGCCTAGATTCAGGCATTTGGACGCGTTTGAGGTCCGGCTGAATTCTGAGATAGAAACGCCGGGTGTAGAAATCTTCAAG	253	0
60	root_contig_458	AGAGAGAGAGAGAGAGAGAGAGTCATGGCGGCATCTCGGATCTTGATCCCGAGCACGAACCCGAAGAAGCGCGGACCCAAGGAGATGGACGGGGACGACGACGACTGGACGGTGGCGAAGCGTTCTCCRGCGGTGGCGAACGGCGGCGTTTGGGATCCGGCGCAGTCGCTGGCGAGCGCTCGGCACGAGTTCGGCGAGCACGGAGGGGTGAACATGTCGATCGAGGCGTCGGCGACGTTCACGGTGATGGAGCCGGACACGATGCGGCGGATGTTCGCCGGAGAGCTCGGCCCCGACCGGGATTTCTTCATCTACAGCCGCCACTTCAACCCCACCGTCCTCAACCTCGGCCGGCAGATGGCGGCGCTCGAGGGGACCGAGGCCGCCTACTGCACCGCC…	1920	0
61	root_contig_7552	TTATATAATATGTAAGAATTTGTGCCAAATCTGTTTTCATTCAATGGCAGGTCGAACTTAACACTACCCTTCTTTATGATATCCATGATGACATGGACTTTGCCAAAGAGTTGATGAAAGAAGAATCCGTGCTGGTTCTACCAGGTTCTGTGATTGGGCTGAAGGGTTGGGTGAGGATGTTCTTTGGTGTGCCCAACCATTTGTTGGAAGAGGCCTGCGATCGGATCAAGTCATTTTGCGAAAGGCGGTGACACCCAAAAATGAAGCTATTTATGTAATTTATATATTGGGGAATAAATAACTAAAGAGAATTAACTTGTTCTCTTGTAACAAATTCAGTGATGAGAAAAGTTCAG	356	21.66
62	root_contig_567	GTTGAGAAGGTTGGGAGTTGGCGGTTCATCGTCACGGTAGAAGCTGCTCTAACAAGATCCGGTGATCTCTACGGTCTCGGCCGGCGACTCCCCTCGGTGGCGGTCCGGCAGCTCTCCTCGGTGGCGGTCCGGCGATCAAGCTGTGGAAGAGGCTTCGGTTTCATAAGTGGAGAATATGTTTTCAGCCATGCAGATATCTGCCGCGATCTCCTCAAACTCCTCAGCGATCTTTGGTCAGAGCAGCTTCGATATCAGGAGATCAAAGTCCTCCAATCAAGGGAGGAAGTATGGGATTTGTAGATGCGTTGCGACTCCTACCACCGAGAAAGCCGCTTACAAGACAAAGGTTCCTCGCAATGCAAATATGGCAAAACTTCAAGCTGGTTATTTGTTCCCGGA…	1707	0
63	root_contig_528	CTTTTGATCCTTCGATGTCGGCTTCAGCTACGGCCTGCTCTTCGCGTTTGGGCAGCTGAGGGATCTCATCCGAAAGCTCATCGATTGGTTCAAATCCAACTCGAAAAATCTCCAGGGTTACGCTCCGATCTGCTTGGGTCTTGAAGATTTCTACACCCGGCGTCTCTATCTCCGGATTCAGGACTGTTTTGGTCGACCGATTTCAAGTGCACCGGACTCTTGGATTGACGTTGTCGAGCGTCGTTCAAATGACGGTAACAAGACACTCCACCGGACTTCAAACACGTCGAAATGTCTAAATCTAGGCTCGTACAATTACCTCGGATTCGCTGCAGCCGATGAGTACTGTACTCCCCGTGTTATCGAGTCACTGAAAAAGTACTCACCAAGTACCTGCAG…	1754	0
64	root_contig_3206	TCGCGGCCACCTCTATAAATTGTTCATCAATAATTACGAGGTGTCATTTACAGGGCATGTAAGGAAAAAACTGTAAAGAGTTGCTTATTGATAGGAGTTGAAGAAGTTGATAGTATCTTTAAGTGCTTGAATAAAAACATCCACTTCTTCTTTAGTGTTGTAGAAATGAAGGCTCGCACGCGCACTTGAATTTACACCCAAGTAACGATGGAGAGGTTGAGCACAATGATGACCCGATCGAATAGCCACTCCATGCTGTTCATCAAGAAAAGTTGCAATATCCGTTGGATGAATGTTCTCAACATTAAATGAACAAAGGGCTGCATGATGGACTGATTCTGAAGGACTGGGACCATAGATGCGCACATTGGGGATAGATTGAAGGCTGTAATAGAGATA…	634	0
65	root_contig_7586	TTACTATAATCTATTACCTAATTTTTGTTGCTTTCTATGTATAATTTCGTCTAGGAGATTCTTACCATTTGTTTGCTTTCCCATCGGAATGCAATTTCTCTGGTATGAAATTCCCCCTTGACTTGGTTAAGATCATCAAGGAAGATGCTGGCAATTTTGTGGAAGGATCTCTAAATCAGCGGGGACGCTGGATGGTACTGATAGATGCTGCAAAAGGATGTGCTACTGAACCACCAGATCTAGCTAGATATCCTGCTGATTTTGTTGTTTTTTCTTTCTACAAGATTTTTGGTTATCCAACTGGGCTTGGAGCTCTTATTGTACGGAATGAGGCAGGCAGTATTTTGAATAAGAG	355	0
66	root_contig_4084	TAGTTTACCTGGATCACGCTGGAGCTACCCTGTACTCTGAATCCCAGATAGAAGCCGTCGCCAAAGACCTTAGTTTTAATGTTTATGGGAACCCTCATAGCCAAAGTGAATCGAGTATGGCTACATCTGACATCATAAGTTCGGCGAGGCAACAGGTCCTTGACTATTTTAATGCATCTCCAAAGGAATACAAGTGCATATTTACATCTGGGGCAACAGCAGCTCTGAAACTTGTTGGAGAAACATTTCCTTGGAGTAGAGAAAGCTGTTACATGTACACGATGGAGAATCATAACAGTGTTCTCGGGATTAGAGAATAGCCAAAGTGAATCGAGTATGGCTACATCTGACATCATAAGTTCGGCGAGGCAACAGGTCCTTGACTATTTTAATGCATCT…	536	0

## Sheet: Table S8
Table S8. Annotation of transcripts from subtractive libraries identified as potential C16-hydroxylation candidates (from 2OGD enzymes family).
No unique cluster	Unigenes ID	Nucleotide sequence	Unigene Length	FPKM	TPM	Blastx E-value	Blastx accession (E-value)	Function	Organs blastn E-value	Organs blastn accession (E-value)
1	MeJ-RDA_contig_81	CATGAACAGATCACATTGGTGGCCTCCAAGTTCTTAGCCCTAATGGGTGGATTGATGTTCATCCTATTCATGGAACTTTGTTGATAAACATTGGAGATATGCTACAACTAATATCCAATGACATATTTAAAAGCGTGGAGCACCGTGTGCTGGCAAACAAAAATGAACGTGCTAGAATATCAGTGGCACTCTTTTTCACTCTTTATCTCTGTCCTACAACAAGAAAGTATGGTCCTATCAAGGAACTACTCTCAGAAGATAACCCTGCAATTTATAGGGAAACAACATTAACTGAATTTGCTGATCTGTTCATG	314	9012.26	3563.33	5.55e-12	Sl: 16DOX	C-16 hydroxylation	3.45e-12	root_contig_4371
	SQ-RDA_contig_15	GAGACCACCGGACCCAACATGGTTGTTGATATGTGTAAGGGTGTTCATGGATAGTCGACGTCGACTATCCATGAACAGATCACATTGGTGGCCTCCAAGTTCTTAGCCCTAATGGGTGGATTGATGTTCATCCTATTCATGGAACTTTGTTGATAAACATTGGAGATATGCTACAACTAATATCCAATGACATATTTAAAAGCGTGGAGCACCGTGTGCTGGCAAACAAAAATGAACGTGCTAGAATATCAGTGGCACTCTTTTTCACTCTTTATCTCTGTCCTACAACAAGAAAGTATGGTCCTATCAAGGAACTACTCTCAGAAGATAACCCTGCAATTTATAGGGAAACAACATTAACTGAATTTGCTGATCTGTTCATGGATAGTCGACGTCTGT…	581	5311.94	1876.66	4.02e-11	Sl: 16DOX	C-16 hydroxylation	6.55e-12	root_contig_4371
2	MeJ-RDA_contig_2593	ATGAACAGATCAGACTCAACCATTATCCACCTTGTCCTAACCCTGACATTGTTCTAGGATGTGGTCGCCACAAAGATTCTGGTGCTTTAACTGTTCTTGCTCAAGATGAAGTTAGTGGGTTAGAAGTGAGGAGAAAATCTGATGGTGAATGGGTTTTGATTAAACCTTTACCTAATGCTTATATTATCAATGTTGGAGATGTAATTCAGGTTTGGAGTAACGATGCATATGAGAGTGTTGAACATAGAGTGATGCTGAATACAGAGAAGGAAAGGCTTTCATATCCATTCTTTCTCTTTCCCTCACACTACACCATGGTGGAACCTTTGAAAGAGCTCACTAATGATC	348	20.41	8.07	5.6e-26	Sl: 16DOX	C-16 hydroxylation	7.43e-15	stalk_contig_1327
	SQ-RDA_contig_2887	CATGAACAGATCAGACTCAACCATTATCCACCTTGTCCTAACCCTGACATTGTTCTAGGATGTGGTCGCCACAAAGATTCTGGTGCTTTAGCTGTTCTTGCTCAAGATGAAGTTAGTGGGTTAGAAGTGAGGAGAAAATCTGATGGTGAATGGGTTTTGATTAAACCTTTACCTAATGCTTATATTATCAATGTTGGAGATGTAATTCAGGTTTGGAGTAACGATGCATATGAGAGTGTTGAACATAGAGTGATGCTGAATACAGAGAAGGCAAGGCTTTCATATCCATTCTTTCTCTTTCCCTCACACTACACCATGGTGGAACCTTTGAAAGAGCTCACTAATGATCTGTTCATGGA	359	38.29	13.53	1.83e-25	Sl: 16DOX	C-16 hydroxylation	3.98e-12	stalk_contig_1327
3	MeJ-RDA_contig_2081	CATGAACAGATCAATGTCCCTACATTACCTAATGCTCTTGTCGTCAATCTTGGCGACCAAATGCAGATTATGAGTAATGGAATATTCAAGAGCATAATGCACAGGGTTGTGACAAATAGAGAAAAGTTGAGGATGTCTATAGCAATGTTTAATGAGCCAGAACCAGAGAACGACATTGGACCTGTTGATGGACTAATAAATGAGACACGTCCAAGGGTGTATAAAAATGTCAAAAATTATGGTGATATTAACTATAGGTGCTATCAAGAGGGGAAAATAGCACTTGATACTGTCAAAATGACAGATAACTAGCTATGATCTGTTCATGG	329	115.16	45.53	2.04e-09	Sl: 16DOX	C-16 hydroxylation	0.000504	stalk_contig_21917
	SQ-RDA_contig_681	CCATGAACAGATCAATGTCCCTACATTACCTAATGCTCTTGTCGTCAATCTTGGCGACCAAATGCAGATTATGAGTAATGGAATATTCAAGAGCATAATGCACAGGGTTGTGACAAATAGAGAAAAGTTGAGGATGTCTATAGCAATGTTTAATGAGCCAGAACCAGAGAACGACATTGGACCTGTTGATGGACTAATAAATGAGACACGTCCAAGGGTGTATAAAAATGTCAAAAATTATGGTGATATTAACTATAGG	259	106.16	37.5	1.28e-09	Sl: 16DOX	C-16 hydroxylation	0.000391	stalk_contig_21917
4	CHL-RDA_contig_1991	CCATGAACAGATCAATCTGCTATTGATAGTTTAGTGAAGGAGATTGGAAATGCATGCAAAGAGTGGGGATTCTTTCAAGTCACAAACCATGGAATCCCTTTGAGTCTTAGGCAGAGACTTGAGGAAGCTTCTAGATTGTTCCTTGCTCAAAGCTTGGAGGAGAAAAAGAAGGTTGCTAGAGATGAAATCAATCCAACTGGTTATTATGATACAGAGCACACCAAAAATGTTAGAGATTGGAAAGAAGTGTTTGATTTTCTATCCCAAGACCCTACTTTCGTTCCTCTGAATTCTGATGAACATGATGATCTG	312	26.83	10.94	1.73e-10	Sl: 16DOX	C-16 hydroxylation	1.46e-10	stalk_contig_1327
	MeJ-RDA_contig_997	CATGAACAGATCAATCTGCTATTGATAGTTTAGTGAAGGAGATTGGAAATGCATGCAAAGAGTGGGGATTCTTTCAAGTCACAAACCATGGAATCCCTTTGAGTCTTAGGCAGAGACTTGAGGAAGCTTCTAGATTGTTCTTTGCTCAAAGCTTGGAGGAGAAGAAGAAGGTTGCTAGAGATGAAATCAATCCAACTGGTTATTATGATACAGAGCACACCAAAAATGTTAGAGATTGGAAAGAAGTGTTTGATT	255	92.87	36.72	1.94e-12	Sl: 16DOX	C-16 hydroxylation	1.18e-10	stalk_contig_1327
5	CHL-RDA_contig_941	GGTACTTATTACATTACCTTTACAGCAAAACCAAAACTGGAAGATGCTACCCATGTTCATGCTTCCAACTGCCCTGCTACAACTTTTCAGGCTCACGTCTGTAAAAGTAAGCCAGAACCTGTGATCAGATTCGTTCCGCTGCAAGTACGGTGGGATTCTTTCAGGTGATAAACCATGGTGTAGCGCCGGAATTGCTAAGAAGTGTTATTGGTGCTATGAAGGCGTTTCATGAACAGCCTGCGGAGGAGAGGAAGAAGGTGTACCGTAGGGAAATGGGAACTGGTGTGTCTTATATATCCAACGTCG	306	129.96	52.98	9.56e-08	Sl: 16DOX	C-16 hydroxylation	3.15e-06	root_contig_943
	MeJ-RDA_contig_317	ATGAACAGATCAGATTCGTTCCGCTGCAAGTACGGTGGGATTCTTTCAGGTGATAAACCATGGTGTAGCGCCGGAATTGCTAAGAAGTGTTATTGGTGCTATGAAGGCGTTTCATGAACAGCCTGCGGAGGAGAGGAAGAAGGTGTACCGTAGGGAAATGGGAACTGGTGTGTCTTATATATCCAACGTCGATCTGTTCATG	202	527.54	208.58	2.32e-08	Sl: 16DOX	C-16 hydroxylation	2.01e-06	root_contig_943
6	MeJ-RDA_contig_101	TGAACAGATCAAGCTATTTGCAGGACCTATCTCTCCATCATGTCTTGAAGTATAGAATGTTGCAATTGACATTCTTTCTTTTTCAGAGTTCACAATTGCTCGATGCTCAATACTTCGATATATTCCGTTAGTTATAATCTCAAGAATGTCTCCAATATTTACAATGAAGGCATTAGGCAGGGGTTTAACAGGGACCCACATGCCATCTTTTCTTACTTGGAGTCCTTCTACTTCATTGAGTTGAAGAAGGATAGTCAGTCCTGATCTGTTCATGGATAGTCGACGTATTGAGCATCGAGCAAT	303	601.79	237.94	8.54e-17	Sl: 16DOX	C-16 hydroxylation	6.01e-09	stalk_contig_1081
	SQ-RDA_contig_527	TCCATGAACAGATCAAGCTATTTGCAGGACCTATCTCTCCATCATGTCTTGAAGTATAGAATGTTGCAATTGACATTCTTTCTTTTTCAGAGTTCACAATTGCTCGATGCTCAATACTTCGATATATTCCGTTAGTTATAATCTCAAGAATGTCTCCAATATTTACAATGAAGGCATTAGGCAGGGGTTTAACAGGGACCCACATGCCATCTTTTCTTACTTGGAGTCCTTCTACTTCATTGAGTTGAAGAAGGATAGTCAGTCCTGATCTGTTCATGG	279	591.28	208.89	1.32e-15	Sl: 16DOX	C-16 hydroxylation	5.51e-09	stalk_contig_1081
7	SQ-RDA_contig_83	CAGCCTCTCACCGCAGATCCGCGAGGGCGAGCGCGCGCGCCTGGGCCTTACCAACGTCGACTATCCATGAACAGATCACCTCTAGCTGGTCACCGATGTTGATGACGATGGAGTGGCGCAACGGCGGGACTTCGACCCACTGGCCGTCCTTGAGCAGCTGAAGGCCGCTCACCTGGTCGTCTTGGAAGAGGAGGATTACGCCGCCGGCGTCGGTGTGGGCCCGGAGGCCTTTTATCAGCTCGGGACGCGGGCACGGTGGGTAGTTGCTCACCTTGGTGCCGAACGTTGGGCCTTTCGACCCATTGAAGGCCTGCTTCAAGTAACCCTTCTCCAGGCCCAGGTTCTCGCACATCAGATCTGCGGTGAAAGGCTGGAGAGTGCTGTTCATGGATAGTCGAC…	432	626.9	221.48	6.74e-15	Sl: 16DOX	C-16 hydroxylation	2.65e-148	stalk_contig_1066
8	MeJ-RDA_contig_2044	TCTCACCGCAGATCTCTACTATCCAGTTCCCAATAGTGGACTTTAGTGGGCTGAAGATGAGCATGGCAGGAACGGAATTAGCATGGGTGGCCACTCGTGCAAAAGTAATGGAGGCTCTCGAGACCGTCGGATTCTTCACAGTTAAGTTTGACGACATATCGCGGGAGCTCCTCGACGAGCTCTTCGGCCCAGCGGTGAAGTCGTTATTCAGTATCCCCGACGAGCTCAGGGTTAAGATGGCTTCCGAAAACGAGATATCTATGATGAAACGCGTGGCGCCGCGCTACGATAGCTTCTTCATCGACGAGGCACAAAGCCCAGACGCTGTTCATGGATAGT	339	34.93	13.81	0.00119	Sl: 16DOX	C-16 hydroxylation	5.52e-162	root_contig_1189
9	MeJ-RDA_contig_1315	GTTTGTGCTATCACACGGTGCTCCACACTCTTGTACTTCCCATTTGTTATTACCTCAAGCTGGTCACCAAGGTTGACAACAATGGAGTGGCGCATTGGTGGAACATCAACCCACTGGCCATCTTTGAGCAGCTGTAAGCCACTGACTTTGTCATCCTGGAAGAGAAGGATGATTCCACCGGCATCGGTGTGAGCTCGAAGACCCTTCACCAGCTCTGGATTGGGACATTGAGGGTAGTTAGCTACCTTGGTGACCAGCTTGAGGTAATAACAAATGGGAAGTACAAGAGTGTGGAGCACCGTGTGATAGCACAAACGAATGGAACAAGAATGTCCA	336	35.24	13.93	3.16e-21	Sl: 16DOX	C-16 hydroxylation	1.29e-49	stalk_contig_1066
10	SQ-RDA_contig_3167	ATGAACAACCGACGTCGTAGCTTGGGGCGTAGAATGTCACCACTGAGAGCCGGTCCTTTTCTTCCTCCGTCACTACACGGTGCTCCACGCTTTTGTACCTCCCGTTGGTTAGCACTTCTAGAGTATCTCCAATGTTGACAACTAGTGCATTCAGTATGGGACGGACTGGAACCCAGGAGTGACCTTTGAGAATTTGCAATCCTACGGAGTGTGCGTCTTGCTGGAGGACGATGAGAGCGCTGCCATCAGAGTGCGGGCTGAGTCCGAGGACGAGATCTGCGGTG	284	19.36	6.84	7.87e-20	Sl: 16DOX	C-16 hydroxylation	3.54e-05	stalk_contig_15206
11	CHL-RDA_contig_2259	ATGAACAGATCAGGTGCTGAGCATGTGCCGGACGGTAATGAGGCTCTTATCGTCGGGCCTCGGATTACCGGAGGATTACCTGCAACGGGCTTTCGGCGGGGACGACATCGGGGTGTGCATGAGGACGAACTTCTACCCGAAATGCCCTCAGCCGGAGCTGGCGCTCGGGCTGTCGGCGCACTCGGACCCCGGGGGCATCACGGTCCTTTTGGTGGACGACCGCGTGAGGGGGCTCCAGGTCCGCAAGGGCGGCGCGTGGGTCACTGTGGATCTGTTCAT	279	7.5	3.06	4.48e-16	Sl: 16DOX	C-16 hydroxylation	1.92e-08	stalk_contig_33106
12	CHL-RDA_contig_1910	ATAGTCTTTGAATTTCTCACTCATTGTGGGAGCTTGTTGAGCTTGCAGTACTTATAGTCTTTGTATTTCCTCGTCTTATACTTGGCGGGGCTCTTTTTGCTAACAAGTTGAGGCAAAGGGCCGACCACCGTATCTTCGGGCGGCGAGCAAAACACCGGCCACGACATCCTAACCTTCTCCTTGTTCACCGTCGTTCTGTGCAACACACTCTTGTAACGTCCATTGCTCAAAATCTCGATTTTGAGCAATGGACGTTACAAGAGTGTGTTACACA	274	91.66	37.37	6.27e-06	Sl: 16DOX	C-16 hydroxylation
13	MeJ-RDA_contig_2186	CATGAACAGATCATGGTGGGGATTCAAAGCTTATTTCCGAGATGACTCGTTTTGCTAAAGGATTCTTTGATTTGTCACCAGAAGAGAGACTTCGTTTTGACATGTCTGGTGGTAAAAAGGGTGGCTTCATTGTCTCTAGCCATCTCCAAGGAGAAGCTGTGAAGGATTGGAGAGAATTAGTGACATATTTTTCATACCCAATTAGACAAAGAGACTATTCAAGGTGGCCAGACAAGCCAGAAGGATGGAAAGAAGTAACAGAAGAATACAGTG	273	8.67	3.43	1.32e-06	Sl: 16DOX	C-16 hydroxylation
14	SQ-RDA_contig_4194	GAACAGATCCGCCGCTTCTCGTCGGGCTCGAGCGTGAAGAATTCCCTCGCCGAAGACTCGACCCGACGGAGGAGGCTCGAGGGGACCCCGTGGTTGGTCACCTGAAAGAAGCCCCACTCGCTGCACGCGGCCTCGACCTCCGCGACGAGGCTCTCGAGGGCTTCGTCGTCAACGTTGGGGGAATCGAGGAGCGGAGAGAGGTCGATGAGTGGGATTCCGCCTCCCTCGACGGGGGTGGGATTGGGGCGGTGCTTGATCTGTTCATGG	267	10.29	3.64	2.14e-08	Sl: 16DOX	C-16 hydroxylation	2.53e-114	stalk_contig_1327
15	CHL-RDA_contig_2071	CCCAGTATATTTTCAGGTGCTCTAACAATTTTGTCTCCTTTTGGACACAAAAAGAAAGCAAGAGTCTTTCTATCCTTCTCCCTATTAGCCAAAACCCTATGGAGACAACTCTTGTACACTCCATTAGTCAATGCCTTGAAAGTGTCACCAATGTTAATGACAAAGGTATCAGGTTGAGGACGAATAGAAAGCCATTTGTTATCCACAAAAGCTTCTAAACCTCCAACTTGGTCTGTTCATGGA	243	17.23	7.02	1.02e-13	Sl: 16DOX	C-16 hydroxylation	3e-05	stalk_contig_1081
16	SQ-RDA_contig_3026	AAGAGAAGGATGATTCCACCAATGCGCCACTCCATTGTTGTCAGCCTTGGTGACCAGCTTGAGGTAATAACAAATGGGAAGTACAAGAGTGTGGAGCACCGTGTGATAGCACAAACAAATGGAACAAGAATGTCCATAGCATCATTCTACAACCCTGGAAGTGATGCTGTAATCTATCCTGCTCCTGAATTGTTGGAAAAACAAGCAGAGGAAAAACACAATGTGTACC	229	12	4.24	8.53e-10	Sl: 16DOX	C-16 hydroxylation	1.89e-26	stalk_contig_1066
17	SQ-RDA_contig_3875	TCACCGCAGATCAAATCGAGATTTTGAGCAATGGACGTTATAAGAGTGTGTTGCACAGAACGACGGTGAACAAGGAGAAGGTTAGGATGTCGTGGCCGGTGTTTTGCTCGCCGCCCGAAGATACGGTGGTCGGCCCTTTACCTCAACTTGTTAGCAAAAAGAGCCCCGCCAAGTATAAGACGAAGAAATACAAAGACTATAAGTACTGCAAGCTCAACAAGCTCCCAC	228	18.09	6.39	5.2e-05	Sl: 16DOX	C-16 hydroxylation
18	CHL-RDA_contig_3060	CAACCACAAAGACGCAAATCTTTTGAACATCATCTACCAGCATCAACATAAGGGACTTGAGGTGCTCACCAAAAGCGGCGAGTGGCTCTACCCATCACCTAAAACCATCACTATCATGGCAGCTGAATCCTTCCAGGCATACAGCAACGAGAGGATTAAAGCTTCTCTACACCGAGTGAGGATGCAAAAGGAATCGAAAGAAACTAGATACTCGATCTGCGGTGAG	226	37.04	15.1	3.47e-05	Sl: 16DOX	C-16 hydroxylation	4.09e-98	stalk_contig_2725
19	CHL-RDA_contig_2789	GGGTGGGCCCCCAGATGCATTTGAAGGTGAAAAGGCAGGAGACGCTTACTGGGTAACACGGTTAATTGGATATCCAGTTTTATCTGATATCAAAAACCAGGAGAAGCAATGCAGTGACATAGGATGTGGAGCTCATACAGACTATGGTCTTCTAACACTGGTCAATCAAGACGATGGTGTTCATGCTCTTCAGGTGAGGAACTGTTCATGGAT	213	78.61	32.05
20	MeJ-RDA_contig_1082	CCTCTCACCGCAGATATGGGAGACGATAGCACCACGAAAAGGAGGATTCATAGTCAATCTAGGGGACATGCTTGAGCGGTGGAGTAATTGCAAATTCAGGTCAACATTGCACCGAGTGGTTGTGGATGGGCAAGAGCGCTATTCTATTGCGTACTTTGTGGAGCCTAGCCATGATTGTGTTGTGGAATGCTTACCTACATGTGTTCATGGAT	212	44.68	17.67	2.83e-07	Sl: 16DOX	C-16 hydroxylation	1.03e-16	leaf_contig_5165
21	CHL-RDA_contig_1048	TGAACAGATCTCGTCCTCGGACTCAGCCCGCACTCTGATGGCAGCGCTCCCACCGTCCTCCAGCAAGACGCACACTCCGTAGGATTGCAAATTCCCAAAGGTCACTCCTGGGTTCCAGTCCGTCCCATACTGAATGCACTAGTTGTCAACATTGGAGATACTCTAGAAGTGCTAACCAACGGGAGGTACAAAAGCGTGGAGCACCGTG	208	20.13	8.2	4.18e-14	Sl: 16DOX	C-16 hydroxylation	8.83e-05	stalk_contig_15206

## Sheet: Table S9
Table S9. Annotation of transcripts from organs libraries identified as potential C16-hydroxylation candidates (from 2OGD enzymes family).
No unique cluster	Unigenes ID	Nucleotide sequence	Unigene Length	FPKM	Blastx E-value	Blastx accession (E-value)	Function
1	leaf_contig_2343	TGAAAATGAAGGGTCTGGTTGTGTTCGAGTGCATGCGTCCCCTTTCTGTCCACATGTAGCATATAGAGTCTTTCTTCTCCTTTTGTGGCAAAAGCAAAGCCAAGATGTCAAGCTACTACGACCGACGAGCGAGTGACATCAAAGCCTTCGACGAGACGAAATCGGGCGTCAAAGGCCTCGTCGACGGCGGGGTGACCGAGATCCCCCGCTTCTTCATCCACACCCCCGACGACCGCGACCACGATGGAGGAGGCGACGCGCCGTCGATACCGGTAATCGATCTGCGGGACTTGGAATCCCTCCGCGATGAGATCGTGCGTGAGGTCCGGGCGGCGTCGGAGACGTTCGGGTTCTTCCAGTTGGTGAACCACGGGATCCCGAGTGAGATGCTCGGCGAGG…	964	20.87	1.26e-13	Sl: 16DOX	C-16 hydroxylation
2	leaf_contig_936	ACCGAGGTTGAGCAATTCCAAATAGAGTTTATGCAAATCCCTCAAAGCCGGTGATGAGAGGGATCCAAAGTATACGAAGACACGAGGAAACTGTGAATGGCAGAAGTAACCTCTAAGTATGGATATCTGTAACAAGGTGAGTTATAGATCCTTCAACCCTTCAAAATACCGTTTTTTATGCCTTCAACTTCACACGGTCGATTAGATTCTTCCCGTCGAGCTTTCTAGAAAAATAGATCTTCAAGAAGTTCTCGATGCTCATCGTCTCGTAATATTCCTTATCTCCTCGTACAATCTCCGGCAGAGGCCCTACCATGTTACCAGGCAACATACTGTGAAACATCGCGATCGAGAGCCGTTCCTTCTCCGGGTTTATAACAGCCCTATGCTCAATGCTCT…	1477	10.45	7.95e-35	Sl: 16DOX	C-16 hydroxylation
3	leaf_contig_30952	CGCAAAGCCACCACCCGGTGCCACGCGCTCTTGTACCGCCCGTTGCTCAGCACCTCGATCTGGTCCCCGGTGTTGATCACGATCGCGTCCGACACGGGCTGGACGTCGATCCAACGGTCGTCCTTGAGGACCTGGAGGCCGCCGACCTCGTCGTCCTGGAATAAGAGGATGACGCCGCCCGCGTCCGTGCGGGCCCGAAGGCCGCCCACGCAGTCGGGGCCCGGGCACCGCCGGTCGTGGCCAGATCCGAAGAGGGGCGGGGGG	264	0	2.5e-18	Sl: 16DOX	C-16 hydroxylation
4	leaf_contig_46125	CGCCATTCTTTTTTATTTGCAGCCCTTGGACTTGATTGACTTGAAGGAGCAGCGTCAAACCGTTGGCATCGGAGTGCGGTGAGAGGCCCAACACCTTATCTGCCTCGGGACACGGAGGGTAATAATTGATCCTCACTGATTGCGACCCAAATAAGTCGGCGAACTTCTTTGGGTCGGCCCCCAAGTTCTGACCTACCAGTCCAAAGAGATCATGCGCAAC	220	10.45	1.12e-05	Sl: 16DOX	C-16 hydroxylation
5	leaf_contig_789	CGCCCAAGCAAACAATCAATAAGAGAAATAAGATAAGTATCATGTCTAAGACTTATAATGGATATGCATCCATGATACACACATAAAGGCTCACTTTACATGGCTAATTACTGCTCGCTACGAACAAGTACCGAGGTTGAGCAATTCCAAATAGAGTTTATGCAAATCCCTCAAAGCCGGTGATGAGAGGGATCCAAAGTATACAAAGACACGAGGAAACCGTGAATGGCAGGCAGAAGTAACCTCTTATTGTGGAATTATCCGTAACAAGGTGAGTTACAGATCCTTCAGCTTCACACGATCGATTAGCTTCTTCCCGTCAAGCTTGCTAGTAAGAAAGATCATCGCGAAGTTCTCCACACTCATCGTTTCGTAATATTCCTTATCTCCTCGTACAAT…	1581	10.45	1.15e-34	Sl: 16DOX	C-16 hydroxylation
6	leaf_contig_1283	GCTTCATCAACAAACACACCCGACCGCAAGGCTCGAAGCACTCCTCATCAATTACCAAGAAAATGGGATCCTCACCTCCGTCCCTAGAAGGCTAGAATGCCTTGACCTCACCCGGGACCCCAACGTGCTCGTGCCCGGGTCCAATGAATGGAAGCTGATGGGTCGGCGCCTCATCGAGGCCCTGGAAACACACGGCGGGGTCGTTGTAGAGTTCCCCTCCGATGAGCTCGACGGGGAGCTGTTGCTCGACGAGACTTTTTCCGCGGTGAGGGACCTCTTCGACGTCCCCTTCGAGACCAAGCTCGAGATCGCCAAGACCTACTCGAGCTACCCTAACGCGCTACCCCACGATGATTACCCTTACTACGAAGCTCTTGGGGTGGCGGATCCCCTGGAACT…	1280	54.68	7.15e-11	Sl: 16DOX	C-16 hydroxylation
7	leaf_contig_1581	TTAAATCAATCTTTCTTCAAGTTGTGCTCTGACAAATATCATATATTTAAATAGATTTATGTATAATCTCGATCAATTACACTGCAATATACAATCCATGATATACGGCAGGAGCAGCGTTCGACGCAAAATATGGCACATAGCCGTTATCAGGAAGAGTATGTGGCCCTAAAACGCTGCAGTAGGTAGTCGCCGCTGAGGATAGGAGGGAACCTTGGGGGAGAAGTCTCACTGCAGCAACTTTCTAAGCATTTGATCAAACAATCAGGGTGTGGGTCAAGAAAGAAGGCAACAGAATAGCGTTCTTGACCAGTTGTGATTACTCTATGCAATGTTGATCGGAACAAGCAGTTAGTCCATCTCTCCAACATGTCCCCGACATTAACAATGAAAGCCCCG…	1166	28.38	8.62e-10	Sl: 16DOX	C-16 hydroxylation
8	leaf_contig_5165	TTAAATCAATCTTTCTTCAAGTTGTGCTCTGACAAATATCATATATTTAAATAGATTTATGTATAATCTCGATCAATTACACTGCAATATACAATCCATGATATACGGCAGGAGCAGCGTTCGACGCAAAATATGGCACATAGCCGTTATCAGGAAGAGTATGTGGCCCTAAAACGCTGCAGTAGGTAGTCGCCGCTGAGGATAGGAGGGAACCTTGGGGGAGAAGTCTCACTGCAGCAACTTTCTAAGCATTTGATCAAACAATCAGGGTGTGGGTCAAGAAAGAAGGCAACAGAATAGCGTTCTTGACCAGTTGTGATTACTCTATGCAATGTTGATCGGAACAAGCAGTTAGTCCATCTCTCCAACATGTCCCCGACATTAACAATGAAAGCCCCG…	603	28.38	1.52e-12	Sl: 16DOX	C-16 hydroxylation
9	leaf_contig_2094	TGAAAATGAAGGGTCTGGTTGTGTTCGAGTGCATGCGTCCCCTTTCTGTCCACATGTAGCATATAGAGTCTTTCTTCTCCTTTTGTGGCAAAAGCAAAGCCAAGATGTCAAGCTACTACGACCGACGAGCGAGTGACATCAAAGCCTTCGACGAGACGAAATCGGGCGTCAAAGGCCTCGTCGACGGCGGGGTGACCGAGATCCCCCGCTTCTTCATCCACACCCCCGACGACCGCGACCACGATGGAGGAGGCGACGCGCCGTCGATACCGGTAATCGATCTGCGGGACTTGGAATCCCTCCGCGATGAGATCGTGCGTGAGGTCCGGGCGGCGTCGGAGACGTTCGGGTTCTTCCAGTTGGTGAACCACGGGATCCCGAGTGAGATGCTCGGCGAGG…	1023	20.87	1.48e-13	Sl: 16DOX	C-16 hydroxylation
10	leaf_contig_922	ACCGAGGTTGAGCAATTCCAAATAGAGTTTATGCAAATCCCTCAAAGCCGGTGATGAGAGGGATCCAAAGTATACGAAGACACGAGGAAACTGTGAATGGCAGAAGTAACCTCTAAGTATGGATATCTGTAACAAGGTGAGTTATAGATCCTTCAACCCTTCAAAATACCGTTTTTTATGCCTTCAACTTCACACGGTCGATTAGATTCTTCCCGTCGAGCTTTCTAGAAAAATAGATCTTCAAGAAGTTCTCGATGCTCATCGTCTCGTAATATTCCTTATCTCCTCGTACAATCTCCGGCAGAGGCCCTACCATGTTACCAGGCAACATACTGTGAAACATCGCGATCGAGAGCCGTTCCTTCTCCGGGTTTATAACAGCCCTATGCTCAATGCTCT…	1489	2.88	2.71e-35	Sl: 16DOX	C-16 hydroxylation
11	leaf_contig_1648	CAGCAGTCACCCACCCAGTTAATAGTTAGCAAGAAAATGGGATCCTCATCACCTCCGTCCCTTGAGTGCCTTGACTTCACCGACGACCCCAGCGTGCTCGAGCCCGGGTCCGAGGAATGGAAGCTGATGGGCCGGCGCCTCATCGGGGCCCTGGAAAAACACGGCGGGGTCGTTGTAGAGTTCCCCTCCGATGAGCTCGACGGGGAGCTGTTGCTCGACGAGACTTTTTCCGCGGTGAGGGACCTCTTCGACGTCCCCTTCGAGACCAAGCTCGAGATCGCCAAGACCTACTCGAGCTACCCTAACGCGCTACCCCACGATGATTACCCTTACTACGAAGCTTTTGGGGTGGCGGATCCCCTGGAACTCGAAGTGGTTCGGGCCTACACGCAGGTCATA…	1149	0	1.29e-18	Sl: 16DOX	C-16 hydroxylation
12	leaf_contig_1196	ATTAATTTGTAACTAAGAAAGGAAAAGAGATCAGCCACAGCTGTGAGGGATGGAGGGAGTGGGAACCTTGAGCGCAGGGAACTCTATCAAGATCCCAAACGTGCAGGCTCTCGCAGAGGAGGAGTTGAGCGATGTCCCTCCGAGGTACATCAGGCCGGAGACCGAGGTTGAGCCGGTCTCTCGAGTAGGGGATTTGGAGCTACCGGTCGTAGATCTCGAAAGGCTCCTGGATCCCCGATCACGGGACGAGGAGTCCGCCAAGCTTAAATACGCTTGCGAGGATTGGGGATTCTTCCAGCTCATAAACCATGGAGTTCCCGAGGAAGCGATTGAAAGCATGAGGAAAGACCTGAAGGAATTCTTTGATCTCCCTTTGGAGACGAAGCAGGCGTACGCGCA…	1327	87.31	1.16e-45	Sl: 16DOX	C-16 hydroxylation
13	leaf_contig_4033	CAACATGTCCCCGACATTAACAATGAAAGCCCCGTCAACAGGATGCACATCCTCCCATACTTGCGGTTGCTTATCTTTTTCCTTGCAAATCTGAAGACCAGGGACTCCATCTGTTGCTAGAAGTGTGACGAATCCATAGTCAGAATGTGCAGATGCACCGCAACCGCCATTTTCGGAAGTAACTAATTCACCTGGGTAGTGTAACAGGCGAACAACTGGCCGCGGGCAATTTAAGGCACCGATTTTCTCAAAGTATTGATCATCGAGATCTAAAGATAATGCAATCAAACGGCCTAACCTCTTGCCCACATTCAAGATTTTTTCAAGATAGGATTCCATGGTGGATCTCCAAAATGGCAATCGTTCTTCCGAAGGCCATTGATTTATGGACTCTGAGCT…	697	28.38
14	leaf_contig_1757	CTCTATTTTGTCACAGAAAAGTAAAAAACCCTTTCACAAACCGGCTGAAATTGAGCAACACCATTTTACTTGACAACACAAAGCAAACCATTATTAGCTTAACAACACAAAGCAACTCCTTTGAACCATCATCAGCTCCACGCAATCAGATCCCTGCATACATACGTAGAGAATTCTCGTAGGCTTTGTTTGCTCGATTGTACTCCAAAAGATCTTCGTAGGTGAATGTCTTGAAGAGTCGCGGATGCTGGTAGTCCACGAGCTCGCGTGGTGCCTCTATGACCTGTTCCGGTCCTGGCCCGAGAGAAACCACGCAGCAGAACCGGTCGTTGTCCCCAGTACTCATCACAACCTTATGAAGAGGCGCAGCGAGCCTCCCATTGCTCCAACCCTCGAGAG…	1117	10.79	6.62e-16	Sl: 16DOX	C-16 hydroxylation
15	leaf_contig_1544	CCCTACCAATTTATTATGTAAAATTAAAATACAAGCAGTTCCGTATATATTTACGGACAGATCTTAAACATAGCCTCTATTTTGTCACAGAAAAGTAAAAAACCCTTTCACAAACCGGCTGAAATTGAGCAACACCATTTTACTTGACAACACAAAGCAAACCATTATTAGCTTAACAACACAAAGCAACTCCTTTGAACCATCATCAGCTCCACGCAATCAGATCCCTGCATACATACGTAGAGAATTCTCGTAGGCTTTGTTTGCTCGATTGTACTCCAAAAGATCTTCGTAGGTGAATGTCTTGAAGAGTCGCGGATGCTGGTAGTCCACGAGCTCGCGTGGTGCCTCTATGACCTGTTCCGGTCCTGGCCCGAGAGAAACCACGCAGCAGAACCG…	1179	0	8.43e-15	Sl: 16DOX	C-16 hydroxylation
16	leaf_contig_2632	GAGAGAAGAAGGGCATCCAGGTTGCGCTTGCCTTCAGGGCCTTTGGTGTACCACGAAGAGACGTAGTCCCCATATACGACGTCGCAAAACTTGAGAGGAGAGGACCTGGTGACGAGCTGGGGAGCAGGGTATATCTTCCGGGACTTCGACGGATCATGGAAAGTAGCAACCGAGAGCCGGGCACGATCGGAATTTACAACAGCACGGTGCTGCGCGCTCTTGTACTCACCATTGCTTATTATCTCAGTCTGGTCAGCCAAAATAACAATGATGGCATCGGATAGAGGTTGTGCAAGTACCCACTCCCCATCCTTCCACACCTCAAGGCCACCAACTTCATCTTGTATCAGAAGAGTTATGGCACCCATATCAGAATGGGCTTGCAAGCCAAGCGCGAGC…	900	0	9.92e-16	Sl: 16DOX	C-16 hydroxylation
17	leaf_contig_992	GACGCTCTTCCGATCTGGCTTACTTTACATGGCTAACTACTGCTCGCTAAGAACAGGTGAATGGCAGGAGTAACCTCTTATTCTGGATATCTGTAACAAGGTGAGTTATAGATCCTTCAACCCTTCAAAATACCGTTTTTTATGCCTTCAACTTCACACGATCGATTACATTTTTCCCTTCGAGCTTGCTTGTAAAGTAGATCTTCATGAAGTTCTCGATGCTCATCGTCTCGTAATATTCCTTATCTCCTCGTACAATCTCCGGCAGAGGCCCAACCATGTCACCGGGCATCACATTGTGAAACGTTGCGATCGAGAGCCGTTCCTTCTCCGGGTTTATAACAGCCCTATGCTCAATGCTCTTATACTTTCCATTGCTTAGTACCTCGAGGGTGTCGC…	1441	10.45	5.2e-36	Sl: 16DOX	C-16 hydroxylation
18	leaf_contig_1228	CTCGAAATAACGGGGTTCATTCATCCAGCCCCAAGGCTTTTATTACAAGCATGTGAACAAGGACTCACATGAGGTGATGCCTCTTCCATAAGCTTGGAGGTGAAGCAAGCATGAACCGAGTTCGATACTGAAATTAGAAGTTGCCTTTATTTATCCATCAGTTGGAATACTAAGTTCAAGTTGCTTATCAACACACACTGAAACTAATCCATCACTCCTTCAAGCTCTCTTGTAGTGATATATCTGTACGTTCTCCACATCGAGCTTCTTTAAGTTACTGGTCTTTCGCGCCTTGAAGAACTCCCCCCAGTTGTACTCCTCGTAGCGGGACGGGTTGTCGTCGTCCACAAGTTCCGCTAATGGGCCCACCATCGTCTGATGCCCCGGGTTTAACAAGAA…	1309	4.44	1.79e-44	Sl: 16DOX	C-16 hydroxylation
19	leaf_contig_12983	TAGCTTAACGACACAAAGCAACGCCATTGAAACATCCTCAGCTCCACCGCCACGCAATCATATCCCTGCATACGTACGTAGACAATTCACGTAGTTGTTTTTTGTTAAACTGTACTCATAAAAATCTTTGTAGGTGAACGGCTTGAATAGTTGCGGATGTTGGTCGTCAACGAGCTCGCGCGGTGCCTCTATGCCCTGATCGGGTTTTGGCCCGACAAAAAACCCACAAGAGAACCGTTCGCTGTCCCCATTCATCACAACGGTATGAAAAGCCGCGCCGAGCCTCCCATTGCTCCAGCCCTCGAGAGCTTGGCCAACAAGGATAACTACAGATCCTTTTCGCGGGACGTTCGCCGGAAACCACTCCCCTTGCTTG	376	0	8.43e-10	Sl: 16DOX	C-16 hydroxylation
20	leaf_contig_13453	AACAGCTGTGTGGTGAATGAGTATGTGGAAGCAGTCAGGGAGCTGGCATGTGAGATCCTGGAGTTGCTGAGTGAAGGGTTAGGCCTGGAGGACACTGAGGCCTTCAGCAGGCTGCTGAGAGACAGAGAGAGTGACTCTGTGGTGAGGCTGAACCACTACCCTCAGTCCTACAGCAATAAGGACATCAAGGATGGGAGGAGTCAGGTCGGGTTCGGTGAGCACACAGATCCTCAAATCCTGACCCTACTCCGATCCAACTCCGTTGCGGGACTGCAGATATTGGGGCCCGCAAACGATTGCACGTGAGTCTCGGTTCCACCTATCCCGGCCGCCTTCTGCGTCATGGCCGGCGACGTCCTCCAGGCTATGA	370	0	4.57e-06	Sl: 16DOX	C-16 hydroxylation
21	leaf_contig_3565	GTCTGCAGGGACATAATATTGGAGTACTCATCTCTTGTGCAAAAACTGGGGGTGACCCTGTTTGAACTGCTTTCATTGGCTCTTGGGCTTGATGGAAGCCATCTGAAAGAGATGGATTGTGCGGAAGGACTCACTTTTGTTGGACATTACTACCCTCCGTGCCCGCAGCCGCACCTCACTCTCGGCACTAGCAAGCATTCGGACCCGGATTTCCTCACAGTTCTCCTCCAGGACCAAATCGGCGGCTTACAGGTGCTGCATCAGAACCGTTGGATCGATGTCGCCCCATTGCCTGGAGCTCTGATCATTAATATCGGAGACCTATTACAGCTGATCTCGAATGACAAATTGAAGAGTGTGGAGCACAGGGTTCTTGCAAGAAAGAATGTTTCGAGAATC…	752	20.87	1.16e-29	Sl: 16DOX	C-16 hydroxylation
22	leaf_contig_974	GACGCTCTTCCGATCTGGCTTACTTTACATGGCTAACTACTGCTCGCTAAGAACAGGTGAATGGCAGGAGTAACCTCTTATTCTGGATATCTGTAACAAGGTGAGTTATAGATCCTTCAACCCTTCAAAATACCGTTTTTTATGCCTTCAACTTCACACGATCGATTACATTTTTCCCTTCGAGCTTGCTTGTAAAGTAGATCTTCATGAAGTTCTCGATGCTCATCGTCTCGTAATATTCCTTATCTCCTCGTACAATCTCCGGCAGAGGCCCAACCATGTCACCGGGCATCACATTGTGAAACGTTGCGATCGAGAGCCGTTCCTTCTCCGGGTTTATAACAGCCCTATGCTCAATGCTCTTATACTTTCCATTGCTTAGTACCTCGAGGGTGTCGC…	1453	0	1.92e-36	Sl: 16DOX	C-16 hydroxylation
23	leaf_contig_2297	CATCTTTTTGTACAAGCTCGGCCTTGTCTCGTCGTCAATGAGGCCCTCCGCCGGCTTCAGCTCTTTCTCGGCATCGAGATTGTAAAACATCGCCACCGATATCCTGTCCTGTGTTGTGTTTGGTTATGACCCTGTGCACGGGGCTTTTGAATATCCCGTTGCTCATTATCTCCATCTGGTCTCCCAAGTTAACCAACAACGCATGAGGGACCAAAGGGATCTTCACCCACTCGCCATCTTTGAGCACCTGAAGGCYCTCCRCATCTTTGTCGGGYAAAACAATGGTGATYGCGGAWCYATCAGAATGAGGCTTGATTCCAAAGACGAGATCGGGCCTCGGACAACGCGGGTAGTAGTTGAATCTCGCGTACACCCTAGCCCTTTCTCCGAATTGGTCGA…	976	6.51	4.33e-35	Sl: 16DOX	C-16 hydroxylation
24	leaf_contig_3279	GTGGATTCTTCATCGCCGGCGACAGGTTTCGAATTTGGCCAAACTGGTTCCTATATCAAGCGCCACTGAGCCTAAGGCTGTCGATGAAGCTCCGACCATTGGTAACGTCATTGGTCGAGATGTAATTGAGAAAACCTCTAAAGCTGCTATCTCTATACCTTTTAGGATGATGCTCGTCCACGAGCTTCTCAGGTGTAATTACCATCATGTCCATCGAGAGGCTGTGGATGCTCGTGATTGAGGTTCTCTTCCTCGCGTTGAGGATTGCTCGGTGCACGAGGCCCTTATATCGACCATTACTCAGCACCTCAAGGTAATCCCCAATGTGGACATGCAATGTCTCTGGAGCCTCAGGGACCGAGCCCCATGATTCAGTGCCCCTGTCGAGGATCTGTAGGC…	788	0	5.38e-21	Sl: 16DOX	C-16 hydroxylation
25	leaf_contig_1723	GCTTCATCAACAAACACACCCGACCGCAAGGCTCGAAGCACTCCTCATCAATTACCAAGAAAATGGGATCCTCACCTCCGTCCCTAGAAGGCTAGAATGCCTTGACCTCACCCGGGACCCCAACGTGCTCGTGCCCGGGTCCAATGAATGGAAGCTGATGGGTCGGCGCCTCATCGAGGCCCTGGAAACACACGGCGGGGTCGTTGTAGAGTTCCCCTCCGATGAGCTCGACGGGGAGCTGTTGCTCGACGAGACTTTTTCCGCGGTGAGGGACCTCTTCGACCTCCCCATCGAGACCAAGCTCGAGATCGTCAAGAGCTCCCCGAGCTACCCTAACGTGCTACCCAACGATGATCACCCTAATTACTACCAAGGTTTGGGGCTCGAGTATCCCCTGGA…	1125	54.68	4.08e-13	Sl: 16DOX	C-16 hydroxylation
26	leaf_contig_3792	CAACATGTCCCCGACATTAACAATGAAAGCCCCGTCAACAGGATGCACATCCTCCCATACTTGCGGTTGCTTATCTTTTTCCTTGCAAATCTGAAGACCAGGGACTCCATCTGTTGCTAGAAGTGTGACGAATCCATAGTCAGAATGTGCAGATGCACCGCAACCGCCATTTTCGGAAGTAACTAATTCACCTGGGTAGTGTAACAGGCGAACAACTGGCCGCGGGCAATTTAAGGCACCGATTTTCTCAAAGTATTGATCATCGAGATCTAAAGATAATGCAATCAAACGGCCTAACCTCTTGCCCACATTCAAGATTTTTTCAAGATAGGATTCCATGGTGGATCTCCAAAATGGCAATCGTTCTTCCGAAGGCCATTGAATATTTATGGTCTCAGA…	724	28.38	1.48e-16	Sl: 16DOX	C-16 hydroxylation
27	leaf_contig_1147	TGAAAATGAAGGGTCTGGTTGTGTTCGAGTGCATGCGTCCCCTTTCTGTCCACATGTAGCATATAGAGTCTTTCTTCTCCTTTTGTGGCAAAAGCAAAGCCAAGATGTCAAGCTACTACGACCGACGAGCGAGTGACATCAAAGCCTTCGACGAGACGAAATCGGGCGTCAAAGGCCTCGTCGACGGCGGGGTGACCGAGATCCCCCGCTTCTTCATCCACACCCCCGACGACCGCGACCACGATGGAGGAGGCGACGCGCCGTCGATACCGGTAATCGATCTGCGGGACTTGGAATCCCTCCGCGATGAGATCGTGCGTGAGGTCCGGGCGGCGTCGGAGACGTTCGGGTTCTTCCAGTTGGTGAACCACGGGATCCCGAGTGAGATGCTCGGCGAGG…	1353	9.2	1.1e-41	Sl: 16DOX	C-16 hydroxylation
28	leaf_contig_13926	GAACCACACTACGACTACTATCAAGACAAATCCAAATTAGAGCTCGGTGGGAATCCTATCGCTACCGTCCTGATGTATCTATCTAACATCACCCAAGGTGGTGAAACAGTTTTCCCCCAATCGGAGTTAAGGGACATTCAATACAAGGACGACACATTGTCCGATTGTGTGGCAACTGGTTACTCGGTGAAACCCATAAAGGGGGACGCTCTCCTTTTCTTCAATCTCCACCTAGATGCGACGCCTGACGAGTGCAGCCTCCATGGTGGATGCAAGATGGTTGAGGGAGAGAAGTGGTCCGCAATCAAATGGATCCATGTTCGGCCCTTCAACACGACTAAACCTATCCCATCGGTGGCGGTC	363	0
29	leaf_contig_1638	CATCTATCAGCAGTCACCCACCCAGTTAATAGTTAGCAAGAAAATGGGATCCTCATCACCTCCGTCCCTTGAGTGCCTTGACTTCACCGACGACCCCAGCGTGCTCGAGCCCGGGTCCGAGGAATGGAAGCTGATGGGCCGGCGCCTCATCGGGGCCCTGGAAAAACACGGCGGGGTCGTTGTAGAGTTCCCCTCCGGTAAGGAGGTGTTCGACGAGACTTTTTCCGCGGCGAGGGATCTCTTTGATCTCCCCATGGAGACCAAGCTCGAGATCACCAAGCGCTACCCGGACTTCCCTACCGTGCTACCCAGTTATGATGATCGCTGGCCCTTCTACCAAGCTTTGGGGCTAAAGAATCCCCTGGAGCTTGAAGAGGTTCGGGCCTTCACGCAGGTCTT…	1152	14.77	1.72e-15	Sl: 16DOX	C-16 hydroxylation
30	leaf_contig_1233	ATTAATTTGTAACTAAGAAAGGAAAAGAGATCAGCCACAGCTGTGAGGGATGGAGGGAGTGGGAACCTTGAGCGCAGGGAACTCTATCAAGATCCCAAACGTGCAGGCTCTCGCAGAGGAGGAGTTGAGCGATGTCCCTCCGAGGTACATCAGGCCGGAGACCGAGGTTGAGCCGGTCTCTCGAGTAGGGGATTTGGAGCTACCGGTCGTAGATCTCGAAAGGCTCCTGGATCCCCGATCACGGGACGAGGAGTCCGCCAAGCTTAAATACGCTTGCGAGGATTGGGGATTCTTCCAGCTCATAAACCATGGAGTTCCCGAGGAAGCGATTGAAAGCATGAGGAAAGACCTGAAGGAATTCTTTGATCTCCCTTTGGAGACGAAGCAGGCGTACGCGCA…	1306	87.31	1e-45	Sl: 16DOX	C-16 hydroxylation
31	leaf_contig_25937	TTATGAACATCCTCTACCAGCGCCAGGCTCAGGGGCTCGAGGTGCTCACCAAAGACGGCGAATGGCTCTTAGCGCCGCCTAACTCCATCACTGTCATGACGGGTGACTCCTTCGAGGTATGGAGCAATGGGAGGATTAAAGCTGGTCTACATCGGGTGAGACTGACGAGCAACGAGACGAGGTACCCGGTGGGCTTCGGGTCCCCGTTCAGAGATGGGTACGTTTTGGAAGCCACATCGGAAACCCGTCCTGTCGGGGAAGAGTTTAGGACCCGGGGGGCG	281	0	4.63e-08	Sl: 16DOX	C-16 hydroxylation
32	leaf_contig_51537	AAAATGGTGAGGCTATGCAGATACTACACTATGAGAATGGCCAGAAATACGAGCCACATTTTGATTATTTCCATGATGAAGCCAATCAAAAAATCGGGGGCCATCGGATCGCCACCGTGCTCATGTATCTATCTGATGTCCAGAAAGGCGGAGAAACTATTTTTCCCTCATCAGAGGTAAAGGAATCCATTGAAATTTGAAACCGCTGT	209	0
33	stalk_contig_22738	AGACGGTGCTCTTCCGATCTGGAATATTCTAGGCAAGTAGAGGGTTTGGGGAAACTCTTATTTGAGCTATTATCAGAAGCACTAGGACTCAAAAGTGACCATCTTGAAAGCTTGGATTGTGCTAAAGGGCACCAACTTATGTGTCATTATTACCCACCATGTCCTGAGCCTGAATTGACTATGGGAAGTACCAGACACTCTGATCCCGATTTTCTTACCGTTCTGCTTCAAGATCACATTGGTGGCCTCAGCT	253	0	2.56e-09	Sl: 16DOX	C-16 hydroxylation
34	stalk_contig_1085	CGTTTACCTACCTTCTCCTACTTTTCTTCTGTTAACAGATCTATGAAAATGAAGGGTCTGGTTGTGTTTGAGTGCATGCGTCCCCTTTCTGTCCACATGTAGCATATAGAGTCTTTCTTCTCCTTTTGTGGCAAAAGCAAAGCCAAGATGTCAAGCTACTACGACCGACGAGCGAGTGACATCAAAGCCTTCGACGAGACGAAATCGGGCGTCAAAGGCCTCGTCGACGGCGGGGTGACCGAGATCCCCCGCTTCTTCATCCACACCCCCGACGATCACGATCACGATGAAGGAGGCAACGCGCCGTCGATACCGATAATCGATCTGCGGGACATGGAATCCCGCCGCGATGAGATCGTGCCTGAGATTCGGGCGGCATCGGAGACGTTCGGGTTCTTC…	1300	7.23	6.27e-27	Sl: 16DOX	C-16 hydroxylation
35	stalk_contig_33106	GTCCGGGGACCATGTTGTGGAGGATGAAGGAGAGGGCGCTGACGTCGGTGTGGGCCTCCACGCCGAGGGCCAGGTCGGGGCGAGGGCATTTCGGGTAGTAGTTTATTTTCATCTGGAGGAGTAGCTCATCAGCGCCGCCGACCTCGGACTCGAGCCGCGGTTCCTCGAGGCCTAGCCCGAGCGAGAGTATGGAGAGCATCTTTGACACCA	210	0	1.2e-07	Sl: 16DOX	C-16 hydroxylation
36	stalk_contig_16339	GGAGGATGTAAAGTGGGCCCAAGGGCTCGTCGGAGTTCTCCAGTTGAACTCGTACCCGGCTTGCCCGGAGCCGGAGCGAGCCATGGGAATGGCGGAGCACACCGACTCCAGCCTCTTCACCGTGCTCCACCAGACCAATACTACGGGACTGCAGGTTCTCTTCAACTCCAGCAGCTGGGTCACCGTTCCACCGGTGCCCGGAGCGCTCGTGGTCAACGTCGGGGATTTGCTCCACATCCTCTCCAATGGACGCTTTAGGAGCGTCCTCCACCGGGTGCTCGTCAAC	286	0	1.15e-18	Sl: 16DOX	C-16 hydroxylation
37	stalk_contig_10259	CTAAACTAATCGAGTATCTCGTTGCATTGCTCATCATCCTCACTCCGTGTTTAACGGATTGAATCCTCCCATTGGTCCATGCCTCTAAGGAGTCAGCAGTAAAGATAGTAAAGGTTTTAGGTGATACAAAGTGCCAGTCGCCAGTTTTGGCGAGCAACTGAAGCCCCTGTTGCTCATGCTGGTAGATGATAGTCAAAATGTGCTGATCTTTGTGGGGGTCCAACCCGACCATGTCCGGATCCACCGGAGCACCGTAGTGAAAAATGCTGAACTCGTGCGTAATGGACTCCACGAGAGAGTTGAAGTGCTCCACAATGCCAAGGCTCTCTAGTATCATCCTCTTCACTAT	349	0	1.09e-09	Sl: 16DOX	C-16 hydroxylation
38	stalk_contig_1066	GCTCTTCCGATCTGGAGTGAGTACTAAGTGTTTAATTTCAAGAGAGAGAGAGAGAGATGGCTTCAAATATCTTCCCTGTTATAAACATGGAGAAGCTTCAAGGAGAGGAGAGAGGAGCAACCATGGAGCTCCTGAATGATGCTTGCGAGAACTGGGGATTTTTTGAGCTGCTCAACCATGGGATCTCAGAGGAGCTGATGGATGAGGTGGAGAGGCTGAGCAAGGAGCACTACCAGACGTGCAGGGAGCAAAGGTTTAAAGAATTTGCAAGCAAAACCTTAGAGGCGGAAGGAGCGAAGGTCGACGCCGATAACCTCGACTGGGAGAGTACCTTCTACCTCCGCCACCTCCCCGACTCCAACATGTCCGAAATCCCCGACCTCACCGATCGTTACAGGA…	1311	24.83	4.45e-43	Sl: 16DOX	C-16 hydroxylation
39	stalk_contig_874	GACGCTCTTCCGATCTGGCTTACTTTACATGGCTAACTACTGCTCGCTAAGAACAGGTGAATGGCAGGAGTAACCTCTTATTCTGGATATCTGTAACAAGGTGAGTTATAGATCCTTCAACCCTTCAAAATACCGTTTTTTATGCCTTCAACTTCACACGATCGATTACATTTTTCCCTTCGAGCTTGCTTGTAAAGTAGATCTTCATGAAGTTCTCGATGCTCATCGTCTCGTAATATTCCTTATCTCCTCGTACAATCTCCGGCAGAGGCCCAACCATGTCACCGGGCATCACATTGTGAAACGTTGCGATCGAGAGCCGTTCCTTCTCCGGGTTTATAACAGCCCTATGCTCAATGCTCTTATACTTTCCATTGCTTAGTACCTCGAGGGTGTCGC…	1441	0	5.2e-36	Sl: 16DOX	C-16 hydroxylation
40	stalk_contig_960	CGTTTACCTACCTTCTCCTACTTTTCTTCTGTTAACAGATCTATGAAAATGAAGGGTCTGGTTGTGTTTGAGTGCATGCGTCCCCTTTCTGTCCACATGTAGCATATAGAGTCTTTCTTCTCCTTTTGTGGCAAAAGCAAAGCCAAGATGTCAAGCTACTACGACCGACGAGCGAGTGACATCAAAGCCTTCGACGAGACGAAATCGGGCGTCAAAGGCCTCGTCGACGGCGGGGTGACCGAGATCCCCCGCTTCTTCATCCACACCCCCGACGATCACGATCACGATGAAGGAGGCAACGCGCCGTCGATACCGATAATCGATCTGCGGGACATGGAATCCCGCCGCGATGAGATCGTGCCTGAGATTCGGGCGGCATCGGAGACGTTCGGGTTCTTC…	1378	0	4.26e-42	Sl: 16DOX	C-16 hydroxylation
41	stalk_contig_34283	GGAGGTTTTAGGCGATGGGTAGAGCCAGTCGCCGCTTTTGGCGAGAATCTCAAGCCCCTGGTGTTGATGCTGGTAGAGGATGGTCAAAAAATGCGGGTCTCTGTGGCTTTTCATGGCGATCGAATTCTCCGGATGATCACCGTATTTAATTATGTTTAACCCGTACTGGTTGGAGTAGTCCAAGAGAGAGTTGAAGTGTTCCTCAAT	207	0
42	stalk_contig_3310	GCTTGAAGAGGTTCGGGCCTTCACGCAGGTCATTTGGCCACATGGGAACGACAGTTTCAGCAACACCTTAAACGGGATTAGCACGAAGATTCACCAAGTGCTCCGAATAATCTTAGAGATGATATTCGATAGCTACGGCGTACGAAGCCACTATGACTCACAGATCCGTAACGCAAGACAAAGCCTCCGCATGTCGAAGTACTCGGCTCCGGCGAAGGGGGAATCCATCGTTGCCCTCACGCCGCACTTCGATCCGAACTTCCTCACCGCGCTGTATCCAAACACAGTGGATGGGCTCCAACTCAAATCCAAGCAAGGGGAGTGGTTTCCAGTGAACGTCCCGCGAAAAGGATCTTTAGTTATTCTTGTTGGCCAAGCTCTCGAGGGTTGGAGCAATGG…	684	0	6.45e-13	Sl: 16DOX	C-16 hydroxylation
43	stalk_contig_11481	ATTGAAGAGGACCTCGATTCCCACCTTCGATCGGTGTGTTACAAACTGCGGTTTTCGGAGTACAAGGTGTTCGAGGGCGAAGAGACCGTCCTCCCCGACCACCTTGACGCCAACCTGATGACCATTGACTGCCAGCACCACGTCGAGGGGCTCGAGGTGCAGACCGACGGCGGCAACTGGATCACCGTCCATCCGTTGCCCAACTCCTTCACTGTCTTGATAGGGGAGTCCATGGAGGTACATATATGCATGCACATTTTTAATTTCACAATTTTATTGTTCAAGTTAATAATTTTATCAAAAAAATGCAGTTAGCAAAGAACAAGGTGT	330	0	1.21e-05	Sl: 16DOX	C-16 hydroxylation
44	stalk_contig_4801	AGGACCTCGATTCCCACATTCGATTGGCGTCCACTTACAAGCTTCGTGTTTCGAAGAATAAGGTGTTTGAGGGCGACGACGTTGTTCTCCCCGACCACTTCGACGGCAACGTACTCACCCTCATCTGCCAGCAACGCGAGGGGCTCGAGGTGCAGACCAACGACAATGACTGGATCGCCATCAAACCCTTGCCCAACTCCTTCGCTGTCTTGATAGGGGAGAACATGGAGGCGTGGACCAACGGGAGGTTGCGCCCTACTTTCCACCGTGTGAGGATAAGCAACACGGAACCGAGGTACTCAATGATCTTTCTCACAGGTTTCGACAAGGACAAAGTGGTAGTGGCTCCGCAGGAGCTTGTCAACGACGAGCACCCCGCCCTCTTTAAGCCCTTCATGA…	542	0	4.75e-15	Sl: 16DOX	C-16 hydroxylation
45	stalk_contig_1327	GTTGTCTTCACTCCAATCATTCAATCAATCGAGATGGGTTTCGAGGTGGATTCAGCATTCATCCAGGCGATCGAGCACCGCCCCAATCCCACCCCCGTCGAGGGTGGCGGAATCCCACTCATCGACCTCACTCCGCTCCTCCATTCCCCCAACGTCGTCGTCGACAAAGCCCTCGAGGGCCTCGTCGCGGAGGTCGAGGCCGCGTGCAGCGAGTGGGGCTTCTTTCAGGTGACCAACCACGGGGTCCCCTCGAGCCTCCTCCGTCGGGTCGAGTCCTCGGCGAGGGAATTCTTCGCGCTCGAGCCCGACGAGAAGCGGCGGATCAAGCGGGACGAGGTCAACCCGCTCGGATACTACGATACAGAGCACACCAAGAATGTCAGAGACTGGAAGGAGGTT…	1177	0	1.47e-43	Sl: 16DOX	C-16 hydroxylation
46	stalk_contig_1391	TCAGAATACAGTAATTACCAAGTTACCAACACACCAAAAGCACCAACAAGCAACAACAAAACAAGTGCGAGATAAAACATAAACTGTATGCGAGCTCAGATTTTCGCCCATTCGATTGCCCTCTCTCCCAATACATAATTTTGGAAGAAGACGGCGTAGTAATCCTTTGCTATCATCTTTTTGTACAAGCTCGGCCTTGTCTCGTCGTCAATGAGGCCCTCCGCCGGCTTCAGCTCTTTCTCGGCATCGAGATTGTAAAACATCGCCACCGATATCCTGTCCTTTGCTGCGTTGGTCACGACCCTGTGCACGGGGCTTTTGAATATCCCGTTGCTCATTATCTCCATCTCGTCTCCCAAGATGACCAGCAACGCATGAGGGACCAAAGGGATCTTCACC…	1151	0	1.14e-39	Sl: 16DOX	C-16 hydroxylation
47	stalk_contig_1669	CATCTATCAGCAGTCACCCACCCAGTTAATAGTTAGCAAGAAAATGGGATCCTCATCACCTCCGTCCCTTGAGTGCCTTGACTTCACCGACGACCCCAGCGTGCTCGAGCCCGGGTCCGAGGAATGGAAGCTGATGGGCCGGCGCCTCATCGGGGCCCTGGAAAAACACGGCGGGGTCGTTGTAGAGTTCCCCTCCGGTAAGGAGGTGTTCGACGAGACTTTTTCCGCGGTGAGGGACCTCTTCGACCTCCCCATCGAGACCAAGCTCGAGATCGTCAAGAGCTCCCCGAGCTACCCTAACGTGCTACCCAACGATGATCACCCTAATTACTACCAAGGTTTGGGGCTCGAGTATCCCCTGGAGCCCGAAAAGGTTAGGGCCTTCATCCAGGCCATTTG…	1038	0	2.86e-15	Sl: 16DOX	C-16 hydroxylation
48	stalk_contig_22085	GAAGCTCATGTTCATTTCATTGGGCCTGACCGAGGAGGACGTGAAGTGGGCAGGGCCTATCGGAGGATCGCGAAAGGTATCAGCGGCCCTGCAGCTGAACTGGTACCCGGCCTGCCCGGACCCGAACCGCGCCATGGGCCTCGCAGCCCACACGGACTCCGGCCTCCTCACCGTCCTCTATCAGAGCTCCGGCGACCCCGGGCTCCAGGCTCTCCGACCCGAGGACCGGAACGGGCCGGCCCGGTGGGTGGGGGTC	256	0	3.59e-09	Sl: 16DOX	C-16 hydroxylation
49	stalk_contig_27824	CCACTACCCGCCGTGCCCCTCACCGCACCTCGTGTTGGGTGTTGGGCGGCACAGAGACACCGGGGCACTCACTGTCCTCTTCCAAGACGACGTCGGCGGTCTCGAGGTGAAGCGAAAGTCCGACGGCGAGTGGGTTCGCGTCAAACCCATTCGGGATTCTTACATCATCAATGTCGGCGCTATCATTCAGGTATGGAGCAATGATAAGTACGAGAGCGCCGAGCACAGG	229	0	1.47e-19	Sl: 16DOX	C-16 hydroxylation
50	stalk_contig_1324	GAGAGAGAGAGAGAGAGAGATGGGCTCTGATACCACTTTTTCAAAGATCCCGAACATCGACTTCCGTGGGTTGGAGCTGAGCAAGCCAGGAACGAAAGCATGGGATGCCACACGTGCCAAAGTGATGGAGGCTATGGATACCGTCGGGTTCTTTACGGCGGAGTTCGACGAAGTCTCCGACGAGCTCTTCTCCGTGATAGACGAACTATTCCTCCATCCTCTAGAGTTGAAGAAGAAGCTAGTCACGGAGAAGCCGTATCAGGGGTACATCCCGTCGGCGCCGGGCGCCGAGTTCGAGAGCCACAACATCAAAGATCCGCTGCGCCCCGAGTCCGTTCGAGCTCTCACCGATCACTTGTGGCCTGGAGGGAACCCCAGAGTCTGCGATGCATTGACCAC…	1178	0	3.31e-17	Sl: 16DOX	C-16 hydroxylation
51	stalk_contig_1388	CATCTATCAGCAGTCACCCACCCAGTTAATAGTTAGCAAGAAAATGGGATCCTCATCACCTCCGTCCCTTGAGTGCCTTGACTTCACCGACGACCCCAGCGTGCTCGAGCCCGGGTCCGAGGAATGGAAGCTGATGGGCCGGCGCCTCATCGGGGCCCTGGAAAAACACGGCGGGGTCGTTGTAGAGTTCCCCTCCGGTAAGGAGGTGTTCGACGAGACTTTTTCCGCGGCGAGGGATCTCTTTGATCTCCCCATGGAGACCAAGCTCGAGATCACCAAGCGCTACCCGGACTTCCCTACCGTGCTACCCAGTTATGATGATCGCTGGCCCTTCTACCAAGCTTTGGGGCTAAAGAATCCCCTGGAGCTTGAAGAGGTTCGGGCCTTCACGCAGGTCTT…	1152	0	1.72e-15	Sl: 16DOX	C-16 hydroxylation
52	stalk_contig_731	CGCCCAAGCAAACAATCAATAAGAGAAATAAGATAAGTATCATGTCTAAGACTTATAATGGATATGCATCCATGATACACACATAAAGGCTCACTTTACATGGCTAATTACTGCTCGCTACGAACAAGTACCGAGGTTGAGCAATTCCAAATAGAGTTTATGCAAATCCCTCAAAGCCGGTGATGAGAGGGATCCAAAGTATACAAAGACACGAGGAAACCGTGAATGGCAGGCAGAAGTAACCTCTTATTGTGGAATTATCCGTAACAAGGTGAGTTACAGATCCTTCAGCTTCACACGATCGATTAGCTTCTTCCCGTCAAGCTTGCTAGTAAGAAAGATCATCGCGAAGTTCTCCACACTCATCGTTTCGTAATATTCCTTATCTCCTCGTACAAT…	1581	0	1.15e-34	Sl: 16DOX	C-16 hydroxylation
53	stalk_contig_29083	GGGGTTGGGCTGGACGGCGACCCACCGGGAGTCCTTCATGAGCTGCAGGCCGCCGACCTGGTCCTGGTAGAGGATGGTGAGGAAGTCGCTGTCGGTGTGGGGCATCAGGCCGAAGGTCTCCGGCGAGTAGGGGCACGGAGGGTAGCGGTTCAGCCGGAGGAAGCACGTGCTCTTGCTGCAGCCCTCCGTGAATCCGCGACTCCCGGGGTATCCCAGGTTCTCC	223	0	2.81e-12	Sl: 16DOX	C-16 hydroxylation
54	stalk_contig_2567	GCTTGAAGAGGTTCGGGCCTTCACGCAGGTCATTTGGCCACATGGGAACGACAGTTTCAGCAACACCTTAAACGGGATTAGCACGAAGATTCACCAAGTGCTCCGAATAATCTTAGAGATGATATTCGATAGCTACGGCGTACGAAGCCACTATGACTCACAGATCCGTAACGCAAGACAAAGCCTCCGCATGTCGAAGTACTCGGCTCCGGCGAAGGGGGAATCCATCGTTGCCCTCACGCCGCACTTCGATCCGAACTTCCTCACCGCGCTGTATCCAAACACAGTGGATGGGCTCCAACTCAAATCCAAGCAAGGGGAGTGGTTTCCAGTGAACGTCCCGCGAAAAGGATCTTTAGTTATTCTTGTTGGCCAAGCTCTCGAGGGTTGGAGCAATGG…	804	0	2.49e-12	Sl: 16DOX	C-16 hydroxylation
55	stalk_contig_2759	AAAAATGTCAGCAAGCCTGAAGCTTCCAGTGGTGGACTTGTCGTCTCCAGATCGTGCAGCCGTCGCCACATTGATCCGAGAGGCGTGCCTTGATCACGGTTTCTTCTACCTCACAAATCATGGGATCGAGGCCTCCTTCTTTGAGCAGGTGTTTGATGAGAGCAGGAAGTTATTCTCGCTACCTCTACACGACAAGATGAAGATTCAACGGAACGAAGACAACATGGGCTATAACCCCTTGTTCGCCGAGACCCTCGATTCTTCGTTGAAATCTAAAGGAGATCCAAAAGAGAGTTTCCACATTGGTCATATGGGAGGCAGCAACTCTGAGACCATAAATATTCAATGGCCTTCGGAAGAACGATTGCCATTTTGGAGATCCACCATGGAATCCTATTA…	768	0	1.19e-17	Sl: 16DOX	C-16 hydroxylation
56	stalk_contig_10909	GAAATCAGAAGGCCTCGAGCTGCTCACCAAAAGCGGCGAGTGGCTTCGGGCACCACCCAAGACCTTCACTTGCATTACTGGTGATTCATTCTACGCATGGAGCAATGGAAGAATTAAACCTGCGGAGCATGTTGTGAGGATGACGAGCAATGAAACAAGATACTCGATTGACCTTTTATCGCAATTTAAGGATGGATGCAAGATAAAAGTCCCGACAGAGCTCGTGAGCGACGAGCATCCGATGCGCTTCAACACCTTCGATTTCTTGAACTACTTGTCATTCCGCTTCTAGGAGGAGGGTAACAAAGCCAACGAGCCTGTGAAAGCGTACTGCGGAA	338	0
57	stalk_contig_21917	GTGGATCACAGTTCAACCAGTTGAAGGTGCTTTTGTGGTCAATCTTGGAGACCATAGTCCTTATCTAAGTAATGGACGGTTCAAAAATGCTGATCACCACGCAGTGGTGAATTCCAATTACAGCCGATTATCAATAGCAACATTCCAAAACCCAGCACCAGATGCAACTGTGTACCCTTTGAAGATTAGAGAAGGAGAAAAATCTGTAATGGAGGAACCAATTACTCTTGCTGAAATGTATAGGAGGAAGATGAGCT	257	0	9.51e-11	Sl: 16DOX	C-16 hydroxylation
58	stalk_contig_1375	CATCTATCAGCAGTCACCCACCCAGTTAATAGTTAGCAAGAAAATGGGATCCTCATCACCTCCGTCCCTTGAGTGCCTTGACTTCACCGACGACCCCAGCGTGCTCGAGCCCGGGTCCGAGGAATGGAAGCTGATGGGCCGGCGCCTCATCGGGGCCCTGGAAAAACACGGCGGGGTCGTTGTAGAGTTCCCCTCCGGTAAGGAGGTGTTCGACGAGACTTTTTCCGCGGTGAGGGACCTCTTCGACCTCCCCATCGAGACCAAGCTCGAGATCGTCAAGAGCTCCCCGAGCTACCCTAACGTGCTACCCAACGATGATCACCCTAATTACTACCAAGGTTTGGGGCTCGAGTATCCCCTGGAGCCCGAAAAGGTTAGGGCCTTCATCCAGGCCATTTG…	1158	0	3.53e-15	Sl: 16DOX	C-16 hydroxylation
59	stalk_contig_1397	GAGAGAGAGAGAGAGAGAGATGGGTTCCGATACCAACATGATCCCAAAGATTGACTTCCGTGGGTTGGAGCTGAGCAAGGCAGGAACGGAAGCATGGGATGCCACCCGAGCCAAAGTGATGGAGGCTCTCGAGAGCTTCAGTTTCTTTACGGTGGTGTTCGACGGCGTCTCCGACGAGCACCTCGACGAGCTCTTCACCTCGGTGGGAGACGAGCTGTACAGCGCCCCGCTAGAGCTGAAGATGAAGCTACTAGTCCCGGGCCAGACCCAAGAGGGGTACATCCCTCAAGTGGAAGGCTCGGGCTACACCTTCGAGACCCTCAACATCCATGCTCCCCATCGCCTAGACGCCGTTCAAGATTTCACTCATCAATTGTTCCCTCAAGGGAACCCCAAAAT…	1150	0	1.3e-15	Sl: 16DOX	C-16 hydroxylation
60	stalk_contig_13215	AATAGTTCCTTGATGGGACCAAAAGTTCTTGTAGATGCATGATGCAATGTGCCAAAAAAGCTTGCAAGAGAGACTCTTGGACCTACAAGATTTGATGGTACTCTGTGCTGAACACTCTTGAATTTATCATTTGTGAGAATCTGGAGAAAGTCACCAATGTTGACAATTAGAGCCTCTGGTACAGCTGGTATATCAACCCACAAATCGTTATGAAGAACTTGGAGGCCACCTATATGATCTTGTAGAAGCACTGTCATGAAATCCATATCCGTATGTTTTATGGTTCCCATAGCTAATTCTGGTTCAGG	308	0	1.93e-15	Sl: 16DOX	C-16 hydroxylation
61	stalk_contig_15200	GTCCAGGTACTGAGCAACGGTGGTTTTAGAAGCGTGGAGCACAGAGTGATGGTCAACTCGGAGGCCGAGAGATTGTCCATCGCTTTCTTCTATAACCCGAGAGGGGATATCTCGCTGGGGCCGGCGACGGAGCTGGTGGCGCCACCGGAGAGGCCGGCGAGGTACGGGACCATGACGTTCAATGAGTACCGGATGGCGATCAGGAAGAGGGGGCCCAAAGGGAAGTCACTGGTGGAGTCGCTTCAGACATCCTGACAGATAGCTCGATCATGGCTCGTCGCTGTGTACATTG	292	0	1.03e-06	Sl: 16DOX	C-16 hydroxylation
62	stalk_contig_1120	GGACGCGTCGTATCCACCGCTCTTCCGTCGGGCCGGCCTGAACCGCGGTTCGCGCCTCCCTCCGAGCGGTTCAAATCGACAGACCGGCGGCGGCCTAGAGATCCCGGTAGTGGACCTGCAGGCCCTGGACCCGAGCCGGCTCGGCGAAGCCTGCAGGGAGTGGGGGATCTTCCGGCTGGCGAACCACGGGATCCCTCCGGCGGTCGTCGGACGGCTCCTGGACCGGACCCGGTCGATCCTATCCTCGCCCTTCGAGTCGAAGCTGGAGCGGTTCACTCAGCCGGTCGCCTATTTTTGGGGAACCCCAGTTGTCAACCAGAGGGTCAGGTCCCTCAACTGGCTCGAAGGGCTCCACGTCCAGCGCCTCAGCGACCTCAAGTGCGGTGGTGGAGACGGAGG…	1285	0	3.08e-23	Sl: 16DOX	C-16 hydroxylation
63	stalk_contig_3041	AAAAATGTCAGCAAGCCTGAAGCTTCCAGTGGTGGACTTGTCGTCTCCAGATCGTGCAGCCGTCGCCACATTGATCCGAGAGGCGTGCCTTGATCACGGTTTCTTCTACCTCACAAATCATGGGATCGAGGCCTCCTTCTTTGAGCAGGTGTTTGATGAGAGCAGGAAGTTATTCTCGCTACCTCTACACGACAAGATGAAGATTCAACGGAACGAAGACAACATGGGCTATAACCCCTTGTTCGCCGAGACCCTCGATTCTTCGTTGAAATCTAAAGGAGATCCAAAAGAGAGTTTCCACATTGGTCATATGGGAGGCAGCAACTCTGAGACCATAAATATTCAATGGCCTTCGGAAGAACGATTGCCATTTTGGAGATCCACCATGGAATCCTATCT…	724	0	1.48e-16	Sl: 16DOX	C-16 hydroxylation
64	stalk_contig_3148	CTCATTTCTCTCCACATTTAGTCGATACTAGGGTTTATATTTTACTTGAATCTGTGATCGATTTGAACGATTTGGAGGATTGAAAGCAACACCTTAAACGGGATTAGCACGAAGATTCACCAAGTGCTCCGAATAATCTTAGAGATGATATTCGATAGCTACGGCGTACGAAGCCACTATGACTCACAGATCCGTAACGCAAGACAAAGCCTCCGCATGTCGAAGTACTCGGCTCCGGCGAAGGGGGAATCCATCGTTGCCCTCACGCCGCACTTCGATCCGAACTTCCTCACCGCGCTGTATCCAAACACAGTGGATGGGCTCCAACTCAAATCCAAGCAAGGGGAGTGGTTTCCAGTGAACGTCCCGCGAAAAGGATCTTTAGTTATTCTTGTTGGC…	710	0	3e-11	Sl: 16DOX	C-16 hydroxylation
65	stalk_contig_15543	ATGTGCATTCACATGTTGAATTCACAACTTGAAGGACTCCAAGGAAGATTTTCCATTATGGCCTTCGGCATATAAATGTGCCGTGAAATCTTTTATGGTAACATCTTTGTAGATTGGTGGATCTTCTTCTGTAATCAGCTCCTTAATAGGACCATAAACCTTTGAAGTACGATAATTCACAAAGAAGCTTGCTATAGAAATTCTCGAGCCTACGTTTTGTGGTAAGACTCGGTGAAAAACACTAACAAACTTGTCATTTGTGATAAGCTTTAGAAGATCTCCTATGTTTA	290	0
66	stalk_contig_1081	TGTGCTCTTCCGATCTAAAAAAAAAAGGAAAAGAGGTGAGCCACAGCTGCGAGTGATGGGGGGAGTGGGAACCTTGAGCGCAGGGAACTCTATCAAGATCCCAAACGTGCAGGCTCTCGCAGAGGAGGAGTTGAGCGATGTCCCTCCGAGGTACATCAGGCCGGAGACCGAGGTTGAGCCGGTCTCTCGAGTAGGGGATTTGGAGCTACCGGTCGTAGATCTCGAAAGGCTCCTGGATCCCCGATCACGGGACGAGGAGTCCGCCAAGCTTAAATACGCTTGCGAGGATTGGGGATTCTTCCAGCTCATAAACCATGGAGTTCCCGAGGAAGCGATTGAAAGAATGAGGAAAGACCTGAAGGAATTCTTTGATCTCCCTTTGGAGACGAAGCAGGCGTA…	1303	0	3.74e-44	Sl: 16DOX	C-16 hydroxylation
67	stalk_contig_6393	TGATTACTTTCAAGACACTTTTAACTTGGAGCGTGGAGGCCAGCGAGTAGCAACGATTCTCATGTATTTAAGTGATAATGTGGAAGGCGGAGAAACATTATTTCCAATGGCGGGAGATGGAGAATGTAGCTGTGGAGGCAAAATGGTGAAGGGTCTCTGTGTGAAGCCAAACAAGGGAGATGCACTGCTCTTCTGGAGCATGGGACTAAATGGGGGAACAGATCCCAAGAGTCTTCATGGAGGATGTGCAGTTCTCAAAGGCGAGAAATGGTCGGCCACGAAATGGATGAGGCAGAAAACTGCATCCTGATTTCACACTTACACTTCTTTACTATTCTTCACACTGCAGATAAGATGTAGAAACTTGTTATTGTTAATAACGATCGATGATACTCATCC…	454	0
68	stalk_contig_2426	CTCATTTCTCTCCACATTTAGTCGATACTAGGGTTTATATTTTACTTGAATCTGTGATCGATTTGAACGATTTGGAGGATTGAAAGCAACACCTTAAACGGGATTAGCACGAAGATTCACCAAGTGCTCCGAATAATCTTAGAGATGATATTCGATAGCTACGGCGTACGAAGCCACTATGACTCACAGATCCGTAACGCAAGACAAAGCCTCCGCATGTCGAAGTACTCGGCTCCGGCGAAGGGGGAATCCATCGTTGCCCTCACGCCGCACTTCGATCCGAACTTCCTCACCGCGCTGTATCCAAACACAGTGGATGGGCTCCAACTCAAATCCAAGCAAGGGGAGTGGTTTCCAGTGAACGTCCCGCGAAAAGGATCTTTAGTTATTCTTGTTGGC…	830	0	1.09e-10	Sl: 16DOX	C-16 hydroxylation
69	stalk_contig_1530	GGGAGGGAAAGAGATCGAGAGAGATTATGAGTTCCATCCCAAAGATAGATTTTAATGGGTTGGATTTTAGCAAGGCAGGAACTGAAGCATGGGTTGCCACGCGTGCGAAAGTGATCGATGCTCTCGACACCGTCGGATTCTTCACGGCGGTTTTCGACGAAGTCCCCGGCGAGCTGCTCGACGAGCTGTTTGGCCCGGTGGGAAAGATGTTATTTGATTTCCCAGCCGAGCTCAGGCTAAAGGTGACCCCAAACAAGGAGCCCTACTATAAGGAATACGAGGACCCGGGCTACGCCAGCTTCCTCATCGAAAAAACTCCGCAAAACCTCGAGACCGTTCAGGCTTTCACCAAGCAGCTGTGGCCTGAAGGGAACTCTGCAGTCTGTGAGACGCTGTGGG…	1093	0	7.1e-19	Sl: 16DOX	C-16 hydroxylation
70	stalk_contig_2725	ACACGTGCCAAAGTGATGGAGGCTCTCAACACCGTTGGATTCTTTACGGCGGCGTTTGATGACGGGCTCTCTGACGAGAACTTTGGCTCGGTGGTAAACTCGATATTTAGTGCTCCTCTAGAGTTAAAAATGAAGCTGGTCTCGGACAAGCCGTATCAGGGGTACATCCCGGAGAGGCCGGGCCAAAAGTTCGAGAGCCACGGCATCCAAAATGCGCAACGCCCCGAGTCCGTTCGAGCTTTCACCGATCACATGAGGCTTCAAGGGAACCCCACAATCTGCGATGCAATGACCACCTACTGTCAGAAATTATATAAGTTGGAGCTGATAGTGAAGAGGATGATACTAGAGGGCCTTGGCATTGAGGAACACTTCAACTCTCTCGTGGAATCCAACCAG…	774	0	2.01e-11	Sl: 16DOX	C-16 hydroxylation
71	stalk_contig_1893	CTGCAAGGCTGAACGCAGATCCACAGTAAAATTGAACAAATCTCTTCTTGAACTAAATAGAGAGAAAAGAAAGGAGCTTGGAGTCACCAAGAATGTCCCTCGTAACGAGTGTCTCAGGCCTGGAATGGTTCTACTGAAGAATTATATAGGCCACGATGATCAGGTTAAAATCATTAAAAGTTGTCGAGATCTTGGTCTCGGATTGGGTGGATTCTATACACCGGGGTATAAAGATGGAGCAAAGTTAAACCTGCAGATGATGTGTCTCGGTAAGAATTGGGATCCAAATTCGAGATTGTACGAGGACAAGAGACCTACTGATGGTGCCAAGCCGCCCGAAATCCCAGAGGAGTTCAGGAAATTGGTCAATGGAGCAATTGAGGTCTCTCATGATTTTTT…	970	0
72	stalk_contig_912	GTCGGGATGCTCATTGATAGATATATCACAGCTCGTGTTTTTGCTTGCATTCCAATTGGATTCCATGGCGGGCACAAACGGTGGTGCCAAGTTTCACAAAGTTGGGTCTCTCCCGGTGCCGAACGTGCAGGCGCTCGCCGCCGCCGGAGTCGCCGGCGATGAGGTTCTCCGGAGGTACAATCGGCCGGAGATCAACAACGATCCCGTCATAGATGACGTCAGCAACTCCGGCGAGATCCCCATCATCGATTTCTCAAAGCTTCTCCTTCACGATCCTCACAACAATGATGAACTCTCCAGGCTTCACTTGGCTTGCCAGGACTGGGGCTTCTTTCAGCTGATAAACCATGGAGTACCCGATGAGTTGATCGAGAAAATGAAGGGCGTGATCCAGGAGTT…	1407	0	9.94e-36	Sl: 16DOX	C-16 hydroxylation
73	stalk_contig_1253	CTCTAGGTTGTGATGGGGGTTAAGCATTGACCCCTACCAATTTATTATGTAAAATTAAAATACAAGCAGTTCCGTATATATTTACGGACAGATCTTAAACATAGCCTCTATTTTGTCACAGAAAAGTAAAAAACCCTTTCACAAACCGGCTGAAATTGAGCAACACCATTTTACTTGACAACACAAAGCAAACCATTATTAGCTTAACAACACAAAGCAACTCCTTTGAACCATCATCAGCTCCACGCAATCAGATCCCTGCATACATACGTAGAGAATTCTCGTAGGCTTTGTTTGCTCGATTGTACTCCAAAAGATCTTCGTAGGTGAATGTCTTGAAGAGTCGCGGATGCTGGTAGTCCACGAGCTCGCGTGGTGCCTCTATGACCTGTTCCGGTC…	1210	0	8.91e-15	Sl: 16DOX	C-16 hydroxylation
74	stalk_contig_13051	GATGGCTGATGGGTTGGGGATTAAGCCGAGAAATGCTTTGAGCCGGATGGTGATCGATGAAGGCAGTGACTCACTGCTCCGGCTCAACTATTACCCTCTCTGTCCTCGGCTGCGAGGGCTCAACTGCAAATTGACGGGATTTGGGGAGCACACGGACCCACAGATCATCTCGGTGTTGATGTCGAACAACTCCACGGGGCTTCAGATTGCTCTGCGGGACGGCAGCTGGCTCTCGGTTCCGCCGGATCAGAGCTCCCTCTTCGTCAACGTCGGCGACTGCTTGCAGGTTCTGACGAATGGGAGATTTAAG	310	0	7.2e-12	Sl: 16DOX	C-16 hydroxylation
75	stalk_contig_16144	TCCATTGCTCCATACCTCGAAGGATTCACCGGTAAAGATGGTAAAGGTGTTGGGTGATGCGGAGAGCCATTCGCCATTTTTGGTTCTAAGCTCGAGCCCCTTACCTTCATACTGGTAGAGGATGTTCAAAAGATTGGGATCCTTGTTGGCCGTAAGCCCGATCATGGTATGCTGGCCCTTAGGAGCACTGTATTCTAGTATCCTGCACCCATGTTTTGTAGATTCCACGAAAGAGCTGAATTGCTCCACAACTCCAAGGCCCTCAAGTATCATCCTCCTCACTATCAG	288	0	1.58e-07	Sl: 16DOX	C-16 hydroxylation
76	stalk_contig_1531	CTATCTGTCCACATGTGTTGTGCATAGTAGCATAAAGTCTTTCTTCTTCTTTCGGCGGCGAAAGCAAAGCCACGATGGCGGGCTACTACGACCAACGAGCGAGTGAGATTAAAGCCTTCGACGAGACGAAATCCGGCGTCAAAGGCCTCGTCGACGGCGGGGTCACTGAGATCCCCCGCTTCTTCATCCACAGCCCCGACGGCCACGATCACGATGGAGGAGGCGACGCGCCGTCGATACCGGTAATCGATCTGCGGGACATGGAATCCCGCCGCGATGAGATCGTGCGTGAGGTCCGGGCGGCGTCGGAGACGTTCGGGTTCTTCCAGTTGGTGAACCACGGGATCCCGAGTGAGATGCTCGGCGAGGTGGTCGAAGGGGTGAGGAGGTTCAACGAGC…	1093	0	2.09e-39	Sl: 16DOX	C-16 hydroxylation
77	stalk_contig_15206	TGGAGTTCAGACGTGGGCTGTTCCGATGTCCAGGTGCGGAAGGGCGGCGGGTGGGTGACCGTGAACCCCATTCCCAACGCCTTCATCATTAACATCGCCGATCAGATTCAGGTGCTGAGCAATGCGGTGTACAAGAGCGTGGAGCACCGGGTGAGAGTTAACGCCTCCGAAGAGCGAATCTCGATCGCCTTCTTCTACAACCCGAGGAGCGATCTACTGCTGGCCCCCGCGAGGGAGCTGGTGACGCCCGATCGTCCACCGCTCTACCAACCGATGACGTTCAACGATTACA	292	0	3.77e-11	Sl: 16DOX	C-16 hydroxylation
78	root_contig_13042	CGAGAAATGCTTTGAGCCGGATGGTGATCGATGAAGGCAGTGACTCACTGTTCCGGCTCAACTATTACCCTCTCTGTCCTCGGCTGCGAGGGCTCAACTGCAAATTGACGGGATTTGGGGAGCACACGGACCCACAGATCATCTCGGTGTTGAGGTCGAACAACTCCACGGGGCTTCAGATTGCTCTGCGGGACGGCAGCTGGCTCTCGGTTCCGCCGGACCAGAGCTCCCTCTTCGTCAACGTCGGCGACTGCTTGCAGGTTCTGACGAA	271	0	2.72e-10	Sl: 16DOX	C-16 hydroxylation
79	root_contig_4371	GAAAGATTACATAATTTATTTCCTTGTTAAATATAGGGAGGGAATCAGTGTATTATTATGCTACAACATCATCCATTTCCTTGTTTTTAAGTACAAAGCGTATAGATTTTAGACGGATACAACCACAAAGAAATTACTTTTAACTCTCACACATTTATTATATCTATCATTGATAACATATATCAGATTATATCTTAAAATGGTCGAGGGCCGAATGACCATCAAGCCCTTTTGAGTTGTAGTACAAGGCGAAGTCCTTCAAGAGGATTTGTTTGTAAAGTGGGGGGGTTTCTAAGCACAACTCCTTGATAGGCCCATAGAGCCTTTCCGATGGGAAAAGATTTGTTGTAAAGAAGCAGGCTACTGAGATTCTCGAAACATTCTTTCTTGCAAGAACCC…	512	21.66	8.87e-14	Sl: 16DOX	C-16 hydroxylation
80	root_contig_1238	CAAGCATCGATCTATCTACAAAGAAGATAGAGAGAAAGAGAAAGAGAGATGGGCAAAACCGAGATCCCAACGATTAACTTTAGTGGGTTGGAGCTACAAAGTGAAGCATGGGTAGCCACACGTGCCAAAGTGATGGAGGCTATGGATACCGTCGGGTTCTTTACGGCGGAGTTCGACGAAGTCTCCGACGAGCTCTTCTCCGTGATAGACGAACTATTCCTCCATCCTCTAGAGTTGAAGAAGAAGCTAGTCACGGAGAAGCCGTATCAGGGGTACATCCCGTCGGCGCCGGGCGCCGAGTTCGAGAGCCACAACATCAAAGATCCGCTGCGCCCCGAGTCCGTTCGAGCTCTCACCGATCACTTGTGGCCTGGAGGGAACCCCAGAGTCTGCGATGCA…	1153	7.22	3.91e-17	Sl: 16DOX	C-16 hydroxylation
81	root_contig_8140	GAATATCCCCTGAAGCTCGAAACGGTTAAGGCCTTCATCCAGGCAATTTGGCATCATGGGAACGACAGGTTCAGCAAATCCTTAAACAGGATTAGCCTGAAAATTTACCAAGTGCTCCGAATAATCTTCGAGATGATATTCGATACCTACGGCGTACGAAGCCACTGTGACTCCTTGATCGGTAACACAACCAAAAGCCTCCGCATGTCGAAGTACACAGCTCCGGTGAAGGGGGAATCCGTCATTGCCCTCGCGCCGCACCTCGATCCAAACTTCCTCACCGCGCTGTATTCCACCGCGGTGGATGGGCTCCAATTCAAATCCAAGCAAGGGGAGTGGT	340	0	0.01	Sl: 16DOX	C-16 hydroxylation
82	root_contig_943	AAGAGAATCAATCAATAAGAGAACTACTATAAGTAACATATCTAAGACTTATAATGGATATGGCATCCATGATCCACACATAAAGGCTTACTTTACATGGCTAACTACTGCTCGCTAAGAACAGGTGAATGGCAGGAGTAACCTCTTATTCTGGATATCTGTAACAAGGTGAGTTATAGATCCTTCAACCCTTCAAAATACCGTTTTTTATGCCTTCAACTTCACACGATCGATTACATTTTTCCCTTCGAGCTTGCTTGTAAAGTAGATCTTCATGAAGTTCTCGATGCTCATCGTCTCGTAATATTCCTTATCTCCTCGTACAATCTCCGGCAGAGGCCCAACCATGTCACCGGGCACCATATTGTGAAACGTCGCGATTGAGAGCCGTTCCTTCTC…	1329	0	3.46e-36	Sl: 16DOX	C-16 hydroxylation
83	root_contig_6181	AAAAACCCTTTCACAAACCGGCTGAAATTGAGCAACACCATTTTACTTGACAACACAAAGCAAACCATTATTAGCTTAACAACACAAAGCAACGCCATTGAACCATCGATCATCTGCCTCACGGAATCATATCCCTGCATACATACGAAGACTATGCCCGAAGGCATTGTTTGCTTCATTGTGCGCGTTAAGATCTTTGTAGTTGAATGTCTTGAAGACTCGCGGATGCTGGTCGTCTACGAGCTCGTGCGGTGCCTCTATGACATGATCTGGCTTTGGCCCGAGAAAAACCCCGCAGCTGAAGCGGTCGCTGTCCTCGGTCATCAGAACGTTGTGAAGAGGCGCGTGGAGCCTCCCATTGCTCCAACCCTCGAGAGTTTGGCCAACAAGGATAACTAA…	404	0	3.33e-06	Sl: 16DOX	C-16 hydroxylation
84	root_contig_3098	CCAAACCCCCCCTGAAATAAACAGGGATTTCATTCTCCCGAACAACTTTTCTTCTTACGTTCACATTAATCAAATTTGGTAGAAAAATATCTTAAATTTATATCCCTGCATACATACGTAGAGATATCTTGTATCCGCGATTGTACTCAATAAGATCTTTGTAGGTGAATGTTTTGAAGAGTCGCGGATGCTGGTAGTCTACGAGCTCGCGCGGTGCCTCTACGACCTGTTCCGGTTCTGGCCCGAGAGAAACCACGCAGCAGAACCGGTCGTTGTCCCCAGTACTCATCACAACCTTATGAAGAGGCGCAGCGAGCCTCCCATTGCTCCAACCCTCGAGAGTTTGGCCAACAAGGATAACTAAAGATCCTTTTCGCGGGAGGTTCACCGGAACCCACT…	647	0	4.3e-14	Sl: 16DOX	C-16 hydroxylation
85	root_contig_2437	ACCTGTAAGCCGCCGATTTGGTCCTGGAGGAGGATTGTGAGGAAATCTGGGTCCGAATGCTTGCTAGTGCCGAGAGTGAGGTGCGGCTGCGGGCATGGAGGGTAGTAATGTCCAACAAAAGCGAGTCCTTTGGCACAATCCATCTCTTTCAGATGGCTTCCATCAAGCCCAAGAGCCAATGAAAGCAGTTCAAACAGGGTCACCCCCAGTTTTTGCACAAGAGACGAGTACTCCAATATTATGTCCCTGCAGACAGGGGGAAAGTCGTCCGGATTTGGGGGCTCGGGTGCCATGACGCAAAACATTGTGTCCCTCCAGTTTGCCGCGGGCGTGCTGTAGAGGTCGAAGTTGCTGTTGTATAGAACCCTTTTCCCCACCGAATCCCGCGTGTAGTACTCC…	755	70.04	6.48e-27	Sl: 16DOX	C-16 hydroxylation
86	root_contig_1287	GAGGGAGAGATGAGTTCCGATACCAACATGATCCCAAAGATCGACTTCCGTGGGTTGGAGCTGAGCAAGGCAGGAACGGAAGCATGGGATGCCACCCGAGCCAAAGTGATGGAGGCTCTCGAGAGCTTCAGTTTCTTTACGGTGGTGTTCGACGGCGTCTCCGACGAGCACCTCGACGAGCTCTTCACCTCGGTGGGAGACGAGCTGTACAGCGCCCCGCTAGAGCTGAAGATGAAGCTACTAGTCCCGGGCCAGACCCAAGAGGGGTACATCCCTCAAGTGGAAGGCTCGGGCTACACCTTCGAGACCCTCAACATCCATGCTCCCCATCGCCTAGACGCCGTTCAAGATTTCACTCATCAATTGTTCCCTCAAGGGAACCCCAAAATCTGCGATGCA…	1131	7.22	1.72e-16	Sl: 16DOX	C-16 hydroxylation
87	root_contig_1544	CTCAAGAAAATGGGATCCTCACCTCCGTCCCTTGAGTGCCTTGACTTCACCCGGGACCCCAACGTGCTCGAGCCCGGGTCCGATGAATGGAAGCTGATGAGCCGGCGCCTCGTCGAGGCCCTGGAAACACACAGCGGGGTCGTCGTCGAGTACCTCTCCGATGGGGTCAACGGGGAGCTGTTGTTCGACGAGACTTTTTCCGCGGTGAGGGACCTCTTCGACCTCCCCTTGGAGACCAAGCTCGAGATCACCAAGAGCTACCCGCGCTACCCCAACGTGCTAGCCAACGATCATCTCCCTCACTACCAAGCTCTGGGGCTGGCGAATCCCGTGAAGCTYGAAGAGGTTCGGGCCTTCACGCAGGTCATTTGGCCACATGGGAACGACAGTTTCAGCAAC…	1019	0	1.59e-14	Sl: 16DOX	C-16 hydroxylation
88	root_contig_3102	GGCCCAAGCAAACAATCAATAAGAGAAATAAGATAAGTATCATGTCTAAGACTTATAATGGATATGCATCCATGATACACACATAAAGGCTCACTTTACATGGCTAATTACTGCTCGCTAAGAACAAGCACCGAGGTTGAGCAATTCCAAATAGAGTTTATGCAAATCCCTCAAAGCCGGTGATGAGAGGGATCCAAAGTATACAAAGACACGAGGAAACCGTGAATGGCAGAAGTAACCTCTTATTGTGGAATTATCCGTAACAAGGTGAGTTACAGATCCTTCAGCTTCACACGATCGATTAGCTTCTTCCCGTCAAGCTTGCTAGTAAGAAAGATCATCGCGAAGTTCTCCACACTCATCGTTTCGTAATATTCCTTATCTCCTCGTACAATCTCC…	647	48.96	2.18e-09	Sl: 16DOX	C-16 hydroxylation
89	root_contig_1354	CTCTATTTTGTCACAGAAAAGTAAAAAACCCTTTCACAAACCGGCTGAAATTGAGCAACACCATTTTACTTGACAACACAAAGCAAACCATTATTAGCTTAACAACACAAAGCAACTCCTTTGAACCATCATCAGCTCCACGCAATCAGATCCCTGCATACATACGTAGAGAATTCTCGTAGGCTTTGTTTGCTCGATTGTACTCCAAAAGATCTTCGTAGGTGAATGTCTTGAAGAGTCGCGGATGCTGGTAGTCCACGAGCTCGCGTGGTGCCTCTATGACCTGTTCCGGTCCTGGCCCGAGAGAAACCACGCAGCAGAACCGGTCGTTGTCCCCAGTACTCATCACAACCTTATGAAGAGGCGCAGCGAGCCTCCCATTGCTCCAACCCTCGAGAG…	1105	0	7.2e-15	Sl: 16DOX	C-16 hydroxylation
90	root_contig_1142	GGGGAAAGCGGAGGAGCTGATAGAGCAGCGGGTGCAGGAGGTGGCGGAGGACGGCGGTGAACCGTCCTTCCGATTCATCCACAGAGAGGAGGACCGTCCGATGGATGCTCCCCCTCCGACGATCCCTATTCCCGTCGTCGATCTCGGCCGCCTCCTCCAACCGGACGCCGGCGATGAGGCCGACAAGCTCCGGTCGGCCCTCCAGTCGTGGGGGCTGTTTCAGGCTATCGGACATGGGATGTCAGCCTCTTTCTTGGATGAGGTACAAAACATAACGAGATCCTTCTTCCGACTATCGATGGAGGTGAAAAAGAAGTCTAGCATAAAAGTAGCTGAAGATTTCGCAGATTTTGTGGATGGCTACGGCAACGGCAACGAGGCTCTCCTTATAGAAAATCA…	1199	44.15	1.23e-37	Sl: 16DOX	C-16 hydroxylation
91	root_contig_13676	GAGATCTAAACTCTTCCCCTACACCACACTCTGCCGATCTCATCACTTTGTGCTCCACACTCTTGTAAACATCATTACTCCATGCCTGAAAGAAATCTCCAATGTTGACGATAAGAGCGTCTGGGTTCGGCTTGACGGCAACCCATCAGGAATCCTTCATGAGTTGCAGCCCACCGACCTGATCCTGATAGAGAATAGTGAGGAAGTCGCTGTCGGTGTGAGGCATCAGGCCAAAGGTCTCCGGCGAGAAGGGGCGTGACGGGTAT	266	0	1.34e-13	Sl: 16DOX	C-16 hydroxylation
92	root_contig_2999	TGTCTCGGTAAGAATTGGGATCCAAATTCGAGATTGTACGAGGACAAGAGACCTACTGATGGTGCCAAGCCGCCCGAAATCCCAGAGGAGTTCAGGAAATTGGTCAATGGAGCAATTGAGGTCTCTCATGATTTTTTGAGGCGAAACAATGGATGTAATCATGTCGAAGATGAGCTTCCGTGGATGTCACCGGACATCTGCATTGTCAACTTCTACAGTAAAAATGGAAGACTTGGGCTCCACCAGGACAGAGATGAGAGCAGAAAGAGTCTCCACAAAGGATTAGCGGTCGTCTCCTTCTCATTGGGGGACTCCGCCGAGTTCCTCTATGGAGAATTCAGAGATACGGATTTAGTTGAAAGTGTTGTTCTCGAATCCGGTGATGTCTTAATATTCGGC…	661	0
93	root_contig_14211	AATCCGAGGGGGGGGACGTTGATAGTGAACATCGGGGACCTGCTGCAGGCTTGGAGCAATGGACGGTTGCGATCGTCCGAGCACCGTGTCGTCCTTAAACGTCAAGCGGAACGCCTATCACTGGCTTTCTTCTGGTGTTTCGAGGACGAGAAGGTAATATCTGCTTCAGACGACATGGTTGGCGAGGGGAGGCTGAGGGCCTACATGCCGTTCGTCTGCCGAGATTACGTGAGGTTCAGGGAGAGCAGCGAGAAAGGGAGG	261	0	3.75e-07	Sl: 16DOX	C-16 hydroxylation
94	root_contig_1207	ATACTGAAATTAGAAGTTGCCTTTATTTATCCATCAGTTGGAATACTATGTTCAAGTTGCTTATCAACACACACTGAAACCGATCCATCACTCCTTCAAGCTCTCTTGTAGTGATGTATCTGTACGTTCTCCACATCGAGCTTCTTGAAGTTGCTGTTCTTTCGCGCCTTGAAGAACTCCCCCCAGTTGTACTCCTCGTATCGGGACGGGTTGTCGTCGTCCACAAGTTCCGCTAATGGGCCCACCATTGTCTGATGCCCCGGGTTGAAGAAGAAGGGGATCGAAAGCCGGTCCCTCTCCGAGTTCACTGCCACCCTGTGCTCGGCGCTCTCGTACTTGTCATTGCTCCATACCTGAGTGATATCGCCGACGTTGACGATGTAAGAATCCGGGATGGGT…	1167	142.98	1.97e-45	Sl: 16DOX	C-16 hydroxylation
95	root_contig_15043	ACCTGTAAGCCGCCGATTTGGTCCTGGAGGAGGATTGTGAGGAAATCTGGGTCCGAATGCTTGCTAGTGCCGAGAGTGAGGTGCGGCTGCGGGCATGGAGGGTAGTAATGTCCAACAAAAGCGAGTCCTTTGGCACAATCCATCTCTTTCAGATGGCTTCCATCAAGCCCAAGAGCCAATGAAAGCAGTTCAAACAGGGTCACCCCCAGTTTTTGCACAAGAGATGAGTACTCCAAGATTATGTCCCTGCAGAT	254	21.66	4.28e-13	Sl: 16DOX	C-16 hydroxylation
96	root_contig_2276	GTCGGCAAGTCTGAAGCTTCCAGTGGTGGACTTGTCGTCTCCAGATCGTGCAGCCGTCGCCACATTGATCCGAGAGGCGTGCCTTGATCACGGTTTCTTCTACCTCACAAATCATGGGATCGAGGCCTCCTTCTTTGAGCAGGTGTTTGATGAGAGCAGGAAGTTATTCTCGCTACCTCTACACGACAAGATGAAGATTCAACGGAACGAAGACAACATGGGCTATAACCCCTTGTTCGCCGAGACCCTCGATTCTTCGTTGAAATCTAAAGGAGATCCAAAAGAGAGTTTCCACATTGGTCATATGGGAGGCAGCAACTCTGAGACCATAAATATTCAATGGCCTTCGGAAGAACGATTGCCATTTTGGAGATCCACCATGGAATCCTATCTTGAAAA…	786	0	5.87e-13	Sl: 16DOX	C-16 hydroxylation
97	root_contig_1189	CGATCAGAGAGAGAGAGATATGGGCACGCAGATGACGACCACTACTATCCAGTTCCCAATAGTCGACTTTAGTGGGCTGAAGATGAGCATGGCAGGAACGGAATTAGCATGGGTGGCCACTCGTGCAAAAGTAATGGAGGCTCTCGAGACCGTCGGATTCTTCACAGTTAAGTTTGACGACATATCGCGGGAGCTCCTCGACGAGCTCTTCGGCCCAGCGGTGAAGTCGTTATTCAGTATCCCCGACGAGCTCAGGGTTAAGATGGCTTCCGAAAACGAGATATCTATGATGAAACGCGTGGCGCCGCGCTACGATAGCTTCTTCATCGACGAGGCACAAAGCCCTGACGCTGTTCGAGCTTTCACCGATGTCTTGTGGCCTCATGGTTACCCCTCATT…	1177	0	4.89e-15	Sl: 16DOX	C-16 hydroxylation
98	root_contig_1317	CTCTATTTTGTCACAGAAAAGTAAAAAACCCTTTCACAAACCGGCTGAAATTGAGCAACACCATTTTACTTGACAACACAAAGCAAACCATTATTAGCTTAACAACACAAAGCAACTCCTTTGAACCATCATCAGCTCCACGCAATCAGATCCCTGCATACATACGTAGAGAATTCTCGTAGGCTTTGTTTGCTCGATTGTACTCCAAAAGATCTTCGTAGGTGAATGTCTTGAAGAGTCGCGGATGCTGGTAGTCCACGAGCTCGCGTGGTGCCTCTATGACCTGTTCCGGTCCTGGCCCGAGAGAAACCACGCAGCAGAACCGGTCGTTGTCCCCAGTACTCATCACAACCTTATGAAGAGGCGCAGCGAGCCTCCCATTGCTCCAACCCTCGAGAG…	1117	0	6.62e-16	Sl: 16DOX	C-16 hydroxylation
99	root_contig_997	CTCCGGGTGATTTTTAATTTACACTTTCCATCCTAACATTATGATCATACATATAAATTCAGATCTTATAATAGCTTCTTGTAACTCGATTGCCACCTTCTTATAGTCCGGGAGACAGCCCGGAATCATGATGACTTATTCAAACCTAGTCATTTAAGGTTCATAGAAACCACATTAATTTCTCATTTTAACATCATACTCTCCAAGAGTCTCTTCCCTTCAAGTTTTTCAGAGAAGTAGGACTTCATGTAATTCTCATAGCTTATGGTTTTGAAATGCTCTTTGTCGTTCCTCACAAGCTCCGGGATTGGTCCGACCGCTGTGTTCGCGTCCGGGGCAAGGAACGCTGCAATCGAGATCCTAACTCTCTTTGTGTCGACGACGGCTCTGTGCTCGATG…	1296	16.5	3.21e-45	Sl: 16DOX	C-16 hydroxylation
100	root_contig_1829	GAGAGAAGAAGGGCATCCAGGTTGCGCTTGCCTTCAGGGCCTTTGGTGTACCACGAAGAGACGTAGTCCCCATATACGACGTCGCAAAACTTGAGAGGAGAGGACCTGGTGACGAGCTGGGGAGCAGGGTATATCTTCCGGGACTTCGACGGATCATGGAAAGTAGCAACCGAGAGCCGGGCACGATCGGAATTTACAACAGCACGGTGCTGCGCGCTCTTGTACTCACCATTGCTTATTATCTCAGTCTGGTCAGCCAAAATAACAATGATGGCATCGGATAGAGGTTGTGCAAGTACCCACTCCCCATCCTTCCACACCTCAAGGCCACCAACTTCATCTTGTATCAGAAGAGTTATGGCACCCATATCAGAATGGGCTTGCAAGCCAAGCGCGAGC…	914	0	1.46e-15	Sl: 16DOX	C-16 hydroxylation
101	root_contig_23303	CTTTTCTCAAATACCTGCTGAAAATGGAGAACTGATTCAAGTTCTGCGGTATGAAGCAAATCAATATTATAAGCCACATAATGATTACTTTCAAGACACTTTTAACTTGGAGCGTGGAGGCCAGCGAGTAGCAACGATTCTCATGTATCTAAGTGATAATGTGGAAGGCGGAGAAACATTATTTCCAATGGCGGGAGATGGAGG	204	0

## Sheet: Table S10
Table S10. Annotation of transcripts associated with reduction of heterocycles from oxidoreductases family (unigene no 1) and from short-chain dehydrogenases/reductases family (SDR) (unigenes no 2-22) in all three differential products.
No unigenes	Unigenes ID	Nucleotide sequence	Unigene Length	FPKM	TPM	Lowest E-value	Accession (E-value)
1	SQ-RDA_contig_2664	TCCATGAACAGATCACGTGGTAGACCAGCTGCTACTCCTCCATCAGCCAGAGCCTCTATT GCTAAATAAATATAAGCAGGACCACTCCCACTCAGGCCAGTTATTGCATCAAAATACTTA TCATCAGCTTTCCATATTTTGCCAATTGACCCAAATAATTGGGATATAAGATTTGCATCT TCGTCTGTTGCTGCTCCCCCCAAGCTCATAACTGATGCTGCCTCGCCAACTGTAGCAGGT GTGTTAGGCATAACCCTTATAAATCTTTCATGGCCAGCCCATTCCTGAAGATCTGTTCAT GGAT	314	18.09	6.39
2	CHL-RDA_contig_2945	GTCCTAAGATGAGCTCAACGAGAACAGAAATCTCGTGTGGAGCAAAAGGGTAAAAGCTCGTTTGATTCTGATTTCCAGTACGAATACGAACCGTGAAAGCGTGGCCTATTGATCAAAGCTGGTTTGTCAGCTCTTGTCACTGGTGGTGCTTCTGGAATCGGTAAAGGTCTTGTGCTAGCTCTTGCAGAGAAAGGTGTATTTATCACAATTGTTGATTTTTCTCAAGAAAAAGGAACACAAACTGCAGCACCTGTTCAGAAAATAAATGCAAAGATTCATCCAAACTTACGACATCCATCTGTCTTATTTGTCAAATGCGATGTCAACAAC	330	3843.51	1566.82
3	CHL-RDA_contig_1112	TCCATGAACAGATCGCCTAAAGTTATCGACGAATTGGCGAACACTGTCAAGAGAGGAAAGGTCTAGGTGCATGATTGTGTAGTTTTCCTTCGCCATTCCAGCAGATTTTGCAGCTCTTGCAGCTTTGAGGAAATCCCTACAAGCCATAATTACATGCCACTTTCCTGTCTCAGCCAAAGCTTTAGCAGTGGCAAGGCCTAATCCAGATGAAGCACCAGTGATC	223	112.63	45.91
4	CHL-RDA_contig_2660	GGTAAAAACTTTTAAAATCCTCATCAAACGAATAGAGTGCCTCATCAGATTTGTCATGATTATGCCTGGATGAACGGAATTCACGGTGATATTTACGCCTTCTTCCTGTAAGCGTCTAGAAAGCTCACTCGCATGTAGTAAATTTGCTAATTTGGATTGCCCGTAAGCCTTTTTGTCATTATATCCCTCTTTATTGTTGATTCCATCAAACCATATTCCTTCTTCATATGTATGAAGCTGTGCGATAGAGGATAAAATTTACGATCTGCGGTGAGAGGCTGGAGAGTGCTGTACATGGATAGTCG	305	144.11	58.75
5	CHL-RDA_contig_763	CGAAACAAAAGGGTTTCGTCATCAACATCTCATCCATTGCTGGCCATCACCTTGGTGGCGGCATTGACGCCTACTTTTGACACGGTGTAGGCGAGCGCTCCAGGTAATTGTCCACGATGGAGGCCAGCAATGGATGAGATGTTGATGACGGAACCCTTTTGTTTCGTATCACGCATTCGCTTGCAAACGTGCTTCGATACGAGCCAAAGCCCAGTTAGGTTGGTCGTCATGACCGTGTTCATGGATAGTCGACGTCGGTATTCATGGATAGTCGACGTCGGTGTTCATGGATAGTCGACGTCGGTGCGTCGGTGTTCATGGA	322	149.5	60.94
6	CHL-RDA_contig_1696	GAACAGATCCCATAGCAGCTTACCAGAGAAAGAGCCTTCAATTTTGCACTACAGTTAAAAAGGACACCGAAAAACCCAAATTGGGTAATTCTGTGGCACTCTTCCAATTGTAGGCTTTCAAGTGATATGGCAGCCTTGGTGAATGAAATCAATCCGTTGTCCGAGAGAAATGCACACTTGTGAAGGCGTACGCTTTTCAAATTAGGACATCCCTTTCCAACAAGCACTCTCCAGCCTCTCACCGCAAAACAGCAGTCGAGAGAAAAGATGGTCCCTTCGTGGAAGAACTGCTTTAGTCACCGGAGGAACCAAGGGAATCGGGTATGCAATAGTTGGAGAGCTAGCTTGGCTCGGGGTGGCAGTGTATACATGTTCTCGCAACGAGTCGGATCTGTTCAT…	401	99.17	40.43	2.35e-71	stalk_contig_1513
7	CHL-RDA_contig_300	TCCAAGTTCGGCGTGCTCGGCTTCACGCCGACCTCGCCCTTCGTCTCGGCGGCGAGGGCCCGCGTGAAGCCGAGCACGCCGAACTTGGAGGCGCAGTACGCGGTCGCATCCGAGACGGCCTTGATGGCGAGCGACGACGCGACGGTGACGACGCGGCCGTGCGACTCGGTGAGGAACGGCAGCGCCGCGCGGACGACGGCGACCGTGCCCATGAGGTTCACGCCGATGACCTTCTCCCACTCGGTGGGGGCGACGTCGACGAGGCGGCCGCAGCGGTCGATGCCCGCGGCGGTGACGACGGCATCCAGCCCGCCGTGCTTCTCGGTGATCTGCGGTGAGAAGCTGGAGAGTGCTGTTCATGGATAGCTG	369	584.23	238.16
8	CHL-RDA_contig_3479	CTCCTCTACCTAAATTCAACACATCATTTACTTCCTGCACCCCCATCACCATCGCCAACAACAACAACAACAACCTCTTCTCACTTTCTCTTACAAAACCAACTTCATCCTTTCTCATAACAGCTTCTTCTAATAACACTCAGTCACAAACCGTGCTTCCTCCTTACAACGTTTTGATTACTGGCTCAACCAAAGGGATAGGGTATGCTTTGGCGAAAGAGTTTCTAAAAGCAGGGGACAACGTCTTAGTTTGCTCAAAAA	261	0	0	1.95e-19	leaf_contig_14915
9	CHL-RDA_contig_2839	CATGTTGACAATAACCCCTTGCTTCTTTTCTATCATAAGTGGTAGAAAGTGACGAAGAACATTTGAAACTCCCTTGATATTTGTATCCATAACCATATCAAACTCTTTAGCAGGCACTTCCCATACCTTGTTGCATTTATTAATAGTCCCAGCATTGTTTACTATAATATCCGGCACCAGATTCATCCCCGCAACAAGTTTCGCAAATCCCTGAATGCCGTTATCTGAACTCACGTCGACATCGGTGAGGAGGTGTTTCGCGTTGTCGCCGGAGTGGTGTTCATG	285	29.36	11.97	2.96e-144	stalk_contig_5005
10	MeJ-RDA_contig_1516	CGACTATCCATGAACAGATCCGGGCGAAAGACATTGTCAGGTGGGGAGTTTGGCTGGGGCGGCACATCTGTTAAAAGATAACGCAGGTGTCCTAAGATGAGCTCAACGAGAACAGAAATCTCGTATGGAACAGAAGGGTAAAAGCTCGTTTGATTCTGATTTCCAGTACGAATACGAACCGTGAAAGCGTGGCCTATCGATCACTGGTGCTTCATCTGGATTAGGCCTTGCCACTGCTAAAGCTTTGGCTGAGACAGGAAAATGGCATGTAATTATGGCTTGTAGGGATTTCCTCAAAGCTGCAAGAGCTGCAAAATCTGCTGGAATGGCGAAGGAAATCCCTACAAGCCA	351	2867.33	1133.7
11	MeJ-RDA_contig_455	GCGTCGTTCGCGGCCGTCATCCCGAGCGTCGGAGCGGCCGCGTACGGCGCGTCGAAGGCCGCGGTCGTGCAATTCACGCGCGTGCTCGCGAGCGAGCTCGGGCCATGGGGCATCACCGTCGACTATCCATGAACACCCGAACTACGACAACGCGTTCATGCAGCCGGCCGTCCTCCCCGCGGCGTTCCCGAACCTGCTGGTCAACGGCGCGAGCGGCATCGCGGTCGGCATGGCGACGAACATGGTCCCCCACAACCTGATCCCGTCACGGGCGAGGTCGTGCGGGAAGCGAGCGTGTACTGATGGACCTGCCCACCATCTGGTTCGGCGTCATCGGCCTCACCTACGACGACGTCATGCTCCTGCCGGGGCACACCGACGTCGACTATCCATGAACAC…	500	94.72	37.45	0.00747	stalk_contig_5494
12	MeJ-RDA_contig_3113	ATGAACAGATCAAAGCTGGTTTGTCAGCTCTTGTCACTGGTGGTGCCTCTGGAATCGGCAAAGGTCTTGTCCTAGCTCCTGCAGAGAAAGGTGTATTTATCACAATTGTTGATTTTTCTCAAGAAAAGGGAACACAAACTGCAGCACTTGTTCAGAAAATTAATGCCAAATTTCATCCTAACTTACAACACCCATCCGCCTTATTTGTCAAATGTGATGTCACCAACTCAAGGG	234	30.36	12
13	MeJ-RDA_contig_3444	TCCATGAACAGAGACTCTAGCTATGAGCTCCTCTCTTTGTGCACGAGACGCCACATCACAGACGGAACCAGTAATTTTGTATCCTTTTGTGACCCATTGATGTAAGCATTCATTGAGTTGAGTTTGGTTCCTAGCACATGTGTGTACCGTGGCCCCTAGCTCTGCTAACTGCTCCACGATATCATATCCTATTCCTTTGGA	201	47.13	18.63	9.32e-16	root_contig_13569
14	MeJ-RDA_contig_1772	CATGAACAGTCGACTATCCATGAACTAGCACTCTCCAGCCTCTCACCGCAGATCAGCGTGGTCACGCCGACCTCGCCCTTCGTCTCGGCGGCGAGGGCCCGCGTGAAGCCGAGCACGCCGAACTTGGAGGCGCAGTACGCGGTCGCACCCGAGACGGCCTTCGCGGCGGCGACGACCTGGTCGGTCGTGGCACCCGTCGTCTGCGAGTTGTACACGAGCGCGGCGACCTTCTTCTCGACGAAGAGCGCGAGCGTCTCCTTGAGCACGTCGGCGGGCACGTCGGTGCCCTCCTCCACTGCCTCGCTGAACTCGTCCGGCGTGCGGTTCTCGAGACCCATGGCACTCGTCATGTAGAGCGGCACGGGCTCCGTGATCTGCGGTGAGAGGCTGGAGAGTGCT…	411	1336.72	528.52
15	MeJ-RDA_contig_2359	CATCCAAGGAAGCCGAAGAGGTTTCCAAGGAGATTGAGGCTCTGGGTGGGCAGGCTCTAACATATGGTGGAGATGTTTCTAAAGAAGCTGATGTGGACTCTATGATTAAAACTGCAATGGATGCTTGGGGAACTGTTGATGTATTGATAAACAATGCAGGAATAACTAGAGATGGTTTATTGATGAGAATGAAGAAATCTCAGTGGCAAGAGGTTATTGATC	222	85.33	33.74	3.39e-28	root_contig_12724
16	SQ-RDA_contig_1999	ATCCATGAACAGATCAAAGCTGGTTTGTCAGCACTTGTCACCGGTGGTGCCTCTGGAATCGGTAAAGGTCTTGTTCTAGCTCTTGCAGAGAAAGGTGTATTTATCACAATTGTTGATTTTTCTCAAGAAAAGGGAACACAAACTGCAGCACTTGTTCAGAAAATCAATGCCAAGTTTCATCCTAACTTACAACATCCATCTGTCTTATTTGTCAAATGCGATGTCACCAACTCAAGGGATCTGTTCATGG	250	27.49	9.71
17	SQ-RDA_contig_1721	GAAGAGACTCTAGCTATGAGCTCCTCTCTTTGTGCACGAGATGCCACATCACAGACTGAACCAGTAATTTTGTATCCTTTTGTGACCCATTGATGTAAGCATTCATTGAGTTGAGTTTGGTTCCTAACACATGTGTGTACCGTGGCCCCTAGCTCTGCTAACTGCTCCACGATATCATATCCTATTCCTTTGGATCTGTTCATGG	205	67.06	23.69	7.82e-17	root_contig_13569
18	SQ-RDA_contig_2183	TCCATGAACAGATCAAGCGCTTTGAAGGGTAATCAGATTTTCCCAGGTCCTCGAGCAAAAGGCGTGAAAGGAGGAAATGACCTAGATGGTTTGTCCCAACACTAAGCTCAAAGCCTTCAGCGGTGAATCTAGGTTCCTTGGCAGTTGGCAAATAAACAGCGGCATTGTTAACAAGCACATCCAACGGCATTTCAGATCTGTTCATG	206	160.16	56.58
19	SQ-RDA_contig_4659	GAACAGAAGGAATAACAATAGCAGCACCAGAACCAATATTAACAATAGCCCCTTTCTTCCTCTTCAACATCCCAGGCAAAACAGCTTGAGTAACCTTAGTAGTACCAACAACATTAACCTTAATCAAATTCTTCAAAAGGTCTTCATCAACTTCATGAAAGAATCTCGCATAAGGATACGAAATTCCCACGTTGTTAATCAAAACCCCAACATCCAACCCATCAATGGTTTCAGAAATCCTCTTAACACCCTCGTCGAGATC	262	0	0	8.88e-24	stalk_contig_18526
20	SQ-RDA_contig_2558	CAGCCAAATTCCCCACCTGACAATGTCTTCCGCCCGGATCATCCAAGGAAGCCGAAGAGGTTTCCAAGGAGATTGAGGCTCTGGGTGGGCAGGCTCTAACATATGGTGGAGATGTTTCTAAAGAAGCTGATGTGGACTCTATGATTAAAACTGCAATGGATGCTTGGGGAACTGTTCATGGATTGATAAACAATGCAGGAATAACTAGAGATGGTTTATTGATGAGAATGAAGAAATCTCAGTGGCAAGAGGTTATTGATCTGTTCATGGA	271	71.02	25.09	2.17e-25	root_contig_12724
21	SQ-RDA_contig_1577	TCCATGAACAGATCGATAGGCCACGCTTTCACGGTTCGTATTTGTACTGGAAATCAGAATCAAACGAGCTTTTACCCTTTTGTTCCACACGAGATTTCTGTTCTCGTTTAGCTCATCTTAGGACACCTGCGTTATCTTTTAACAGATGTGCCGCCCCAGTCAAACTCCCCACCTGACAATGTCTTCCGCCCGGATTAGCACTCTCCAGCCTCTCACCGCAGATCATCGGCCCGTCGTAGCCGGCCATGATGTCGGTGTCCGCCGCGCCGAGGTGCACGCCCTGCACGAGCGTCCCCTGCCCGGCGAGCTCCAGCCGCACCGCGTTCGTCATGTTCCACTCGGCCGCCTTCGCCGCCGCGTACCCGCCGTTGCCCGAGGTCGAGAACCAGGACAGCAAGG…	249	1967.9	695.24
22	SQ-RDA_contig_1962	GTCTTCCGCCCGGATCGCCTAAAGTTATCGACGAATTGGCGAACACTGTCAAGAGAGGAAAGGTCTAGGTGCATGATTGTGTAGTTTTCCTTCGCCATTCCAGCAGATTTTGCAGCTCTTGCAGCTTTGAGGAAATCCCTACAAGCCATAATTACATGCCATTTTCCTGTCTCAGCCAAAGCTTTAGCAGTGGCAAGGCCTAATCCAGA	209	157.86	55.77

[truncated: 1 more sheets: Table S11]
